# Supplementary material for: Enantioselective photooxygenation of β-dicarbonyl compounds in batch and flow photomicroreactors
Source: Royal Society of Chemistry journal article supplement (doi:10.1039/c9ob01379b), 2019-01-01
Supplement: c9ob01379b1.pdf [file c9ob01379b1.pdf]

## Supporting Information

### Enantioselective photooxygenation of $\beta$ -dicarbonyl compounds in batch and flow photomicroreactor

Xiao-Fei Tang, Jing-Nan Zhao, Yu-Feng Wu, Ze-Hao Zheng, Shi-Hao Feng, Zong-Yi Yu,  
Guang-Zhi Liu, Qing-Wei Meng <sup>\*a</sup>

*State Key Laboratory of Fine Chemicals, School of Chemical Engineering, Dalian University of Technology, Dalian 116024, P.R. China.*

#### Contents

|                                                                                                        |     |
|--------------------------------------------------------------------------------------------------------|-----|
| 1. General Information .....                                                                           | S2  |
| 2. Synthesis of Catalysts .....                                                                        | S2  |
| 3. General procedure in the flow photomicroreactors .....                                              | S11 |
| 4. Control experiments and mechanistic studies .....                                                   | S14 |
| 5. General procedure for the asymmetric $\alpha$ -hydroxylation of $\beta$ -dicarbonyl compounds ..... | S16 |
| 6. Copies of NMR Spectra .....                                                                         | S22 |
| 7. Copies of HPLC Spectra .....                                                                        | S53 |
| 8. References .....                                                                                    | S73 |

## 1. General Information

Unless otherwise stated, all commercial reagents and solvents were used without further additional purification. Analytical TLC was visualized with UV light at 254 nm. Thin layer chromatography was carried out on TLC aluminum sheets with silica gel 60 F<sub>254</sub>. Purification of reaction products was carried out with chromatography on silica gel 60 (200-300 mesh). Melting points were determined with a hot plate apparatus. Optical rotations were measured on a digital polarimeter with a sodium lamp at 20°C (10 cm cell, c given in g/100 mL). <sup>1</sup>H NMR (400 MHz or 500 MHz) spectra was obtained at 25 °C; <sup>13</sup>C NMR (101 MHz) were recorded on a VARIAN INOVA-400M and AVANCE II 400 spectrometer at 25 °C. Chemical shifts are reported as δ (ppm) values relative to TMS as internal standard and coupling constants (J) in Hz. High resolution mass spectrometry data were obtained with UPLC/Q-ToF Mass Spectrometer and were determined by electrospray ionization (ESI). The enantiomeric ratio (ee) were determined by HPLC. HPLC analyses were performed on equipped with Diacel Chiralpak AD-H, OD-H and AS-H chiral column (0.46cm × 25 cm), using mixtures of n-hexane/isopropyl alcohol as mobile phase, at 25 °C with an injection volume of 20 μL at a flow rate of 1 mL/min.

## 2. Synthesis of Catalysts

### 2.1 Preparation of Cn-3

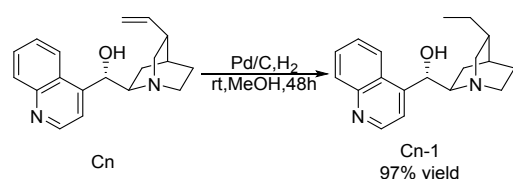

Cn-1 was prepared partly according to Jeong's method<sup>1</sup>. Cn (8.83 g, 30 mmol) and 10% Pd/C (1.77 g) were added to MeOH (150 mL) under H<sub>2</sub>. The reaction was left to stir for 48 h at room temperature. The reaction mixture was filtered and washed with chloroform/MeOH(8/2, 3 × 200 mL). The solution was concentrated in vacuo to give a white solid of Cn-1 (8.63 g, 97% yield).

$[\alpha]_D^{20} = +96$  (c 0.1, CHCl<sub>3</sub>); m.p. 284-286 °C;

<sup>1</sup>H NMR (400 MHz, DMSO-*d*<sub>6</sub>) δ 8.82 (d, *J* = 4.4 Hz, 1H), 8.24 (d, *J* = 8.5 Hz, 1H), 8.01 (d, *J* = 8.4 Hz, 1H), 7.71 (t, *J* = 7.7 Hz, 1H), 7.59 (t, *J* = 7.7 Hz, 1H), 7.51 (d, *J* = 4.5 Hz, 1H), 5.61 (s, 1H), 5.34 – 5.21 (m, 1H), 2.98 (q, *J* = 8.6 Hz, 1H), 2.77 – 2.52 (m, 3H), 1.81 (s, 1H), 1.64 (s, 1H), 1.54 – 1.27 (m, 6H), 0.88 (t, *J* = 7.3 Hz, 3H). <sup>13</sup>C NMR (101 MHz, Chloroform-*d* and Methanol-*d*<sub>4</sub> (4:1)) δ 150.34, 149.54, 147.33, 129.26, 129.17, 126.84, 125.49, 122.85, 118.32, 70.90, 59.72, 50.73, 50.03, 37.11, 26.74, 26.01, 24.89, 19.51, 11.77. HRMS (ESI/[M+H]<sup>+</sup>): Calculated for C<sub>19</sub>H<sub>25</sub>N<sub>2</sub>O requires *m/z* 297.1961, found *m/z* 297.1956.

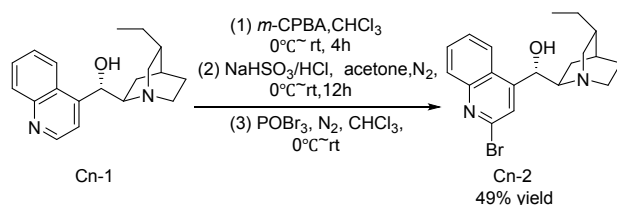

Cn-2 was prepared partly according to Deng's method<sup>2</sup>. Cn-1 (5.93 g, 20 mmol) and *m*-CPBA (75%, 11.53 g, 50 mmol) was added to CHCl<sub>3</sub> (100 mL) at 0°C. The resulting suspension was allowed to warm to room temperature and stirred for 3 hours, during which time the reaction mixture

became a clear yellow solution. The reaction was quenched with NaOH (*aq*) (10% in H<sub>2</sub>O) until pH = 10. The resulting two-phase mixture was extracted with a mixed solvent of CHCl<sub>3</sub>/MeOH (10/1, 6×100 mL). The organic phase was collected and evaporated in vacuo to give the crude product A. This crude product A was used in the next step without further purification. To the solution of product A in acetone (10 mL) at 0°C was added dropwise an aqueous solution of 65% NaHSO<sub>3</sub> /37% HCl /H<sub>2</sub>O(9.6 g/ 6.08 g/ 40 g) under N<sub>2</sub>. The resulting mixture was warmed to room temperature for 1 h. The resulting mixture was stirred overnight. Then, the acetone was removed under vacuum, and it was adjusted to pH=8 with NH<sub>4</sub>OH *aq*. Chloroform (5×250 mL) was used to extract the aqueous layer and concentrated in vacuo. This crude product B was used in the next step without further purification. At 0°C, to the solution of product B in CHCl<sub>3</sub> (100 mL) was added dropwise the solution of POBr<sub>3</sub> (22.9 g, 80 mmol) in CHCl<sub>3</sub> (20 mL) under N<sub>2</sub>. Then orange solution was warmed to room temperature and stirred overnight. CHCl<sub>3</sub> (50 mL) was added and the mixture was poured into ice-water (50 mL). Then it was adjusted to pH=8 with NH<sub>4</sub>OH (*aq*). The organic layer was separated and the aqueous layer was extracted with CH<sub>2</sub>Cl<sub>2</sub> (5×100 mL). The organic layers were combined, dried over Na<sub>2</sub>SO<sub>4</sub> and concentrated. The residue was purified by column chromatography on silica gel (MeOH/EA/PE/Et<sub>3</sub>N=10/40/48/2) to afford Cn-2 as a white solid (3.68 g, 49% yield).  $[\alpha]_D^{20} = +141.2$  (c 0.1, CHCl<sub>3</sub>); m.p. 231-232 °C; <sup>1</sup>H NMR (400 MHz, DMSO-*d*<sub>6</sub>) δ 8.28 (d, *J* = 8.5 Hz, 1H), 7.95 (d, *J* = 8.4 Hz, 1H), 7.78 (t, *J* = 7.7 Hz, 1H), 7.71 – 7.56 (m, 2H), 5.79 (d, *J* = 4.9 Hz, 1H), 5.22 (dd, *J* = 7.8, 5.1 Hz, 1H), 2.97 (q, *J* = 8.4 Hz, 1H), 2.73 – 2.57 (m, 2H), 2.49 – 2.38 (m, 2H), 1.76 (dd, *J* = 13.2, 8.7 Hz, 1H), 1.64 (s, 1H), 1.54 – 1.27 (m, 6H), 0.87 (t, *J* = 7.3 Hz, 3H). <sup>13</sup>C NMR (101 MHz, Chloroform-*d* and Methanol-*d*<sub>4</sub> (2:1)) δ 152.93, 148.19, 141.98, 130.08, 128.47, 127.05, 124.24, 122.98, 122.75, 70.60, 59.61, 50.54, 49.83, 36.93, 26.54, 25.82, 24.72, 19.29, 11.53. HRMS (ESI/[M+H]<sup>+</sup>): Calculated for C<sub>19</sub>H<sub>24</sub>BrN<sub>2</sub>O requires *m/z* 375.1067, found *m/z* 375.1065.

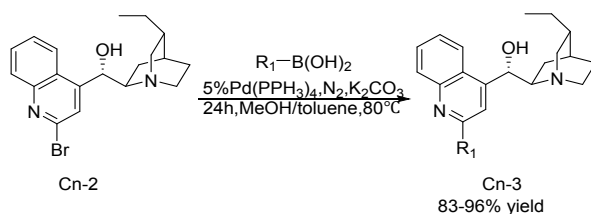

To a flame-dried flask equipped with a magnetic stirring bar and a reflux condenser, Cn-2 (0.38 g, 1.0 mmol), substituted phenylboronic acid (1.2 mmol), K<sub>2</sub>CO<sub>3</sub> (0.28 g, 2.0 mmol), Pd(PPh<sub>3</sub>)<sub>4</sub> (0.06 g, 0.05 mmol) and MeOH/toluene (4 mL/ 4 mL) were added; the solution was stirred at 80°C under nitrogen atmosphere for 24 hours. The reaction was quenched by water (5 mL). CHCl<sub>3</sub> (2×10 mL) was used to extract the aqueous layer. The organic layer were combined, washed by brine (10 mL), dried over Na<sub>2</sub>SO<sub>4</sub> and concentrated in vacuo. The residue was purified by column chromatography on silica gel (MeOH/EA/PE/Et<sub>3</sub>N=5/40/53/2) to afford Cn-3.

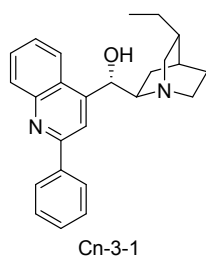

The general procedure was followed using Cn-2 (0.38 g, 1.0 mmol), phenylboronic acid (0.15 g, 1.2 mmol),  $K_2CO_3$  (0.28 g, 2.0 mmol),  $Pd(PPh_3)_4$  (0.06 g, 0.05 mmol). The product Cn-3-1 was obtained as a white solid (0.35 g, 0.94 mmol, 94% yield).  $[a]_D^{20} = +108.0$  (c 0.1, MeOH); m.p. 248-250 °C;  $^1H$  NMR (400 MHz, Methanol- $d_4$ )  $\delta$  8.17 (d,  $J = 8.5$  Hz, 1H), 8.10 (dd,  $J = 17.3$ , 7.5 Hz, 4H), 7.75 (t,  $J = 7.7$  Hz, 1H), 7.61 (t,  $J = 7.7$  Hz, 1H), 7.52 (dt,  $J = 15.6$ , 7.2 Hz, 3H), 5.80 (d,  $J = 2.9$  Hz, 1H), 3.40 (dd,  $J = 13.4$ , 7.3 Hz, 2H), 3.10 (dt,  $J = 10.9$ , 5.3 Hz, 1H), 3.02 – 2.90 (m, 2H), 2.82 (dt,  $J = 13.3$ , 8.9 Hz, 1H), 2.20 (dd,  $J = 13.1$ , 9.3 Hz, 1H), 1.75 (d,  $J = 4.3$  Hz, 1H), 1.56 (qt,  $J = 14.1$ , 7.0 Hz, 5H), 1.08 (ddd,  $J = 13.8$ , 9.2, 4.6 Hz, 1H), 0.93 (t,  $J = 7.1$  Hz, 3H).  $^{13}C$  NMR (101 MHz, Methanol- $d_4$  and Chloroform- $d$  (1:1))  $\delta$  158.38, 151.15, 148.70, 140.31, 130.22, 130.16, 130.06, 129.39, 128.40, 127.32, 125.18, 123.42, 117.46, 71.42, 60.70, 51.32, 50.53, 37.65, 27.06, 26.69, 25.54, 20.20, 12.19. HRMS (ESI/[M+H] $^+$ ): Calculated for  $C_{25}H_{29}N_2O$  requires m/z 373.2274, found m/z 373.2268.

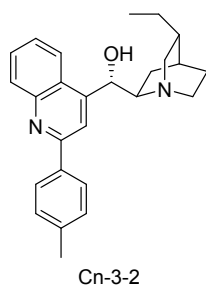

The general procedure was followed using Cn-2 (0.38 g, 1.0 mmol), *p*-tolylboronic acid (0.16 g, 1.2 mmol),  $K_2CO_3$  (0.28 g, 2.0 mmol),  $Pd(PPh_3)_4$  (0.06 g, 0.05 mmol). The product Cn-3-2 was obtained as a white solid (0.32 g, 0.83 mmol, 83% yield).  $[a]_D^{20} = +101.5$  (c 0.1,  $CHCl_3$ ); m.p. 283-284 °C;  $^1H$  NMR (400 MHz, DMSO- $d_6$ )  $\delta$  8.16 (dd,  $J = 22.9$ , 6.6 Hz, 3H), 8.06 (d,  $J = 6.5$  Hz, 2H), 7.70 (t,  $J = 7.6$  Hz, 1H), 7.54 (t,  $J = 7.7$  Hz, 1H), 7.35 (d,  $J = 7.8$  Hz, 2H), 5.68 (s, 1H), 5.39 (s, 1H), 3.08 (d,  $J = 8.0$  Hz, 1H), 2.86 (s, 1H), 2.80 – 2.55 (m, 3H), 2.42 (s, 3H), 1.93 (s, 1H), 1.70 (s, 1H), 1.47 (ddt,  $J = 37.8$ , 19.8, 8.7 Hz, 6H), 0.91 (t,  $J = 7.3$  Hz, 3H).  $^{13}C$  NMR (101 MHz, Methanol- $d_4$  and Chloroform- $d$  (3:2))  $\delta$  158.19, 150.74, 148.47, 140.08, 137.30, 129.94, 128.16, 126.95, 124.86, 123.17, 117.15, 71.21, 60.43, 51.18, 50.42, 37.47, 26.93, 26.50, 25.37, 21.44, 19.88, 12.13. HRMS (ESI/[M+H] $^+$ ): Calculated for  $C_{26}H_{31}N_2O$  requires m/z 387.2431, found m/z 387.2428.

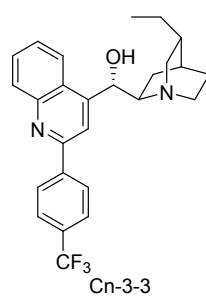

The general procedure was followed using Cn-2 (0.38 g, 1.0 mmol), (4-(trifluoromethyl)phenyl)boronic acid (0.23 g, 1.2 mmol),  $K_2CO_3$  (0.28 g, 2.0 mmol),  $Pd(PPh_3)_4$  (0.06 g, 0.05 mmol). The product Cn-3-3 was obtained as a white solid (0.41 g, 0.93 mmol, 93% yield).  $[a]_D^{20} = +109.3$  (c 0.1,  $CHCl_3$ ); m.p. 276-278 °C;  $^1H$  NMR (400 MHz, Chloroform- $d$ )  $\delta$  8.28 (d,  $J = 8.0$  Hz, 2H), 8.19 (d,  $J = 8.5$  Hz, 1H), 8.09 (d,  $J = 1.7$  Hz, 1H), 7.98 (d,  $J = 8.4$  Hz, 1H), 7.82 – 7.66 (m, 3H), 7.48 (dd,  $J = 8.6$ , 6.6 Hz, 1H), 5.72 (d,  $J = 4.7$  Hz, 1H), 3.41 (s, 1H), 3.11 (td,  $J = 9.2$ , 4.6 Hz, 1H), 3.04 – 2.82 (m, 3H), 2.74 (dt,  $J = 13.3$ , 8.8 Hz, 1H), 2.00 – 1.87 (m, 1H), 1.54 – 1.45 (m, 2H), 1.44 – 1.34 (m, 3H), 1.30 – 1.14 (m, 2H), 0.86 (td,  $J = 7.1$ , 2.1 Hz, 3H).  $^{13}C$  NMR (101 MHz, Methanol- $d_4$  and Chloroform- $d$  (1:1))  $\delta$  156.45, 151.61, 148.69, 143.70, 130.45, 130.30, 128.68, 127.66, 126.18, 126.14, 125.38, 124.75 (d,  $J = 274.7$  Hz,  $CF_3$ ), 117.03, 71.51, 60.59, 51.27, 50.50, 37.66, 27.15, 26.62, 25.48, 20.21, 12.16. HRMS (ESI/[M+H] $^+$ ): Calculated for  $C_{26}H_{28}F_3N_2O$  requires m/z 441.2148, found m/z 441.2147.

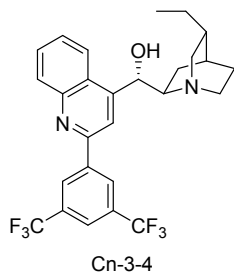

The general procedure was followed using Cn-2 (0.38 g, 1.0 mmol), (3,5-bis(trifluoromethyl)phenyl)boronic acid (0.31 g, 1.2 mmol),  $K_2CO_3$  (0.28 g, 2.0 mmol),  $Pd(PPh_3)_4$  (0.06 g, 0.05 mmol). The product Cn-3-4 was obtained as a white solid (0.49 g, 0.96 mmol, 96% yield).  $[a]_D^{20} = +65.0$  (c 0.1,  $CHCl_3$ ); m.p. 162-164 °C;  $^1H$  NMR (400 MHz,  $DMSO-d_6$ )  $\delta$  8.89 (s, 2H), 8.44 – 8.30 (m, 2H), 8.25 (s, 1H), 8.16 (d,  $J = 8.4$  Hz, 1H), 7.79 (t,  $J = 7.7$  Hz, 1H), 7.65 (t,  $J = 7.7$  Hz, 1H), 5.75 (d,  $J = 5.3$  Hz, 1H), 5.35 (dd,  $J = 8.3, 4.8$  Hz, 1H), 3.16 (q,  $J = 8.5$  Hz, 1H), 2.80 – 2.58 (m, 2H), 2.44 (q,  $J = 6.8, 5.6$  Hz, 2H), 1.90 – 1.73 (m, 1H), 1.67 (s, 1H), 1.51 (dddd,  $J = 31.3, 20.9, 11.4, 5.8$  Hz, 4H), 1.34 (q,  $J = 8.4, 7.4$  Hz, 2H), 0.89 (t,  $J = 7.4$  Hz, 3H).  $^{13}C$  NMR (101 MHz,  $Chloroform-d$ )  $\delta$  153.51, 151.48, 148.34, 141.83, 132.24 (q,  $J = 33.3$  Hz) 130.88, 129.76, 127.67, 127.60, 127.16, 125.03, 123.57 (q,  $J = 273.7$  Hz,  $CF_3$ ), 122.88 – 122.76 (m), 122.64, 115.32, 71.69, 60.31, 51.20, 50.34, 37.43, 29.83, 27.07, 26.39, 25.21, 20.51, 12.05. HRMS (ESI/[M+H]<sup>+</sup>): Calculated for  $C_{27}H_{27}F_6N_2O$  requires m/z 509.2022, found m/z 509.2023.

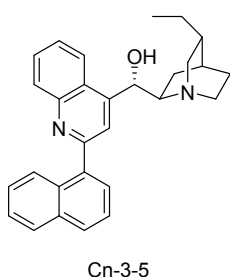

The general procedure was followed using Cn-2 (0.38 g, 1.0 mmol), naphthalen-1-ylboronic acid (0.21 g, 1.2 mmol),  $K_2CO_3$  (0.28 g, 2.0 mmol),  $Pd(PPh_3)_4$  (0.06 g, 0.05 mmol). The product Cn-3-5 was obtained as a white solid (0.40 g, 0.95 mmol, 95% yield).  $[a]_D^{20} = +87.7$  (c 0.1,  $CHCl_3$ ); m.p. 168-170 °C;  $^1H$  NMR (400 MHz,  $DMSO-d_6$ )  $\delta$  8.36 (d,  $J = 8.4$  Hz, 1H), 8.16 (d,  $J = 8.4$  Hz, 1H), 8.08 (q,  $J = 7.9, 6.7$  Hz, 3H), 7.86 – 7.73 (m, 3H), 7.67 (q,  $J = 8.3$  Hz, 2H), 7.59 (t,  $J = 7.3$  Hz, 1H), 7.52 (t,  $J = 7.6$  Hz, 1H), 5.72 (s, 1H), 5.36 (t,  $J = 6.1$  Hz, 1H), 3.09 (q,  $J = 8.3$  Hz, 1H), 2.72 (t,  $J = 8.9$  Hz, 2H), 2.57 (t,  $J = 8.3$  Hz, 2H), 1.83 (t,  $J = 10.7$  Hz, 1H), 1.66 (s, 1H), 1.59 – 1.26 (m, 6H), 0.86 (t,  $J = 7.1$  Hz, 3H).  $^{13}C$  NMR (101 MHz,  $Methanol-d_4$  and  $Chloroform-d$  (5:2))  $\delta$  159.32, 150.59, 134.18, 129.93, 129.75, 129.54, 128.71, 127.90, 127.22, 126.85, 126.31, 125.74, 125.56, 124.74, 123.18, 120.98, 71.34, 60.23, 51.10, 50.42, 37.47, 27.09, 26.44, 25.25, 20.00, 12.09. HRMS (ESI/[M+H]<sup>+</sup>): Calculated for  $C_{29}H_{31}N_2O$  requires m/z 423.2431, found m/z 423.2428.

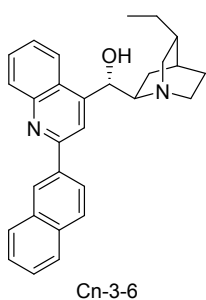

The general procedure was followed using Cn-2 (0.38 g, 1.0 mmol), naphthalen-2-ylboronic acid (0.21 g, 1.2 mmol),  $K_2CO_3$  (0.28 g, 2.0 mmol),  $Pd(PPh_3)_4$  (0.06 g, 0.05 mmol). The product Cn-3-6 was obtained as a white solid (0.36 g, 0.86 mmol, 86% yield).  $[a]_D^{20} = +77.0$  (c 0.1, MeOH); m.p. 248-249 °C;  $^1H$  NMR (400 MHz,  $Chloroform-d$ )  $\delta$  8.61 (d,  $J = 1.8$  Hz, 1H), 8.37 (dd,  $J = 8.6, 1.8$  Hz, 1H), 8.28 – 8.20 (m, 2H), 8.06 – 7.95 (m, 3H), 7.90 (dt,  $J = 6.2, 3.4$  Hz, 1H), 7.71 (ddd,  $J = 8.4, 6.9, 1.3$  Hz, 1H), 7.54 (dt,  $J = 6.2, 3.2$  Hz, 2H), 7.48 (ddd,  $J = 8.3, 6.8, 1.3$  Hz, 1H), 5.76 (d,  $J = 4.5$  Hz, 1H), 3.42 (s, 1H), 3.14 (td,  $J = 9.2, 4.6$  Hz, 1H), 3.04 (dd,  $J = 14.3, 6.4$  Hz, 1H), 2.97 – 2.85 (m, 2H), 2.76 (dt,  $J = 13.1, 9.0$  Hz, 1H), 2.05 – 1.93 (m, 1H), 1.55 – 1.37 (m, 5H), 1.31 – 1.17 (m, 2H), 0.88 (t,  $J = 6.8$  Hz, 3H).  $^{13}C$  NMR (101 MHz,  $Methanol-d_4$  and  $Chloroform-d$  (5:1))  $\delta$  157.25, 150.31, 148.15, 136.99, 133.80, 133.41, 129.92, 129.40, 128.75, 128.48, 127.66, 127.38, 126.75, 126.52, 126.35, 125.14, 124.42, 122.60, 116.61, 71.09, 59.79, 50.89, 50.17, 37.19, 26.79, 26.13, 24.97, 19.28, 11.89. HRMS

(ESI/[M+H]<sup>+</sup>): Calculated for C<sub>29</sub>H<sub>31</sub>N<sub>2</sub>O requires m/z 423.2431, found m/z 423.2430.

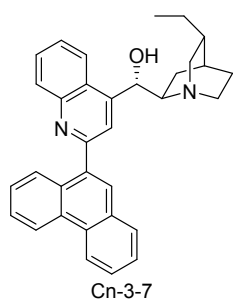

The general procedure was followed using Cn-2 (0.38 g, 1.0 mmol), phenanthren-9-ylboronic acid (0.27 g, 1.2 mmol), K<sub>2</sub>CO<sub>3</sub> (0.28 g, 2.0 mmol), Pd(PPh<sub>3</sub>)<sub>4</sub> (0.06 g, 0.05 mmol). The product Cn-3-6 was obtained as

a white solid (0.41 g, 0.87 mmol, 87% yield).  $[\alpha]_D^{20} = +62.6$  (c 0.1, CHCl<sub>3</sub>);

m.p. 140-142 °C; <sup>1</sup>H NMR (400 MHz, DMSO-*d*<sub>6</sub>) δ 8.98 (d, *J* = 8.4 Hz, 1H), 8.93 (d, *J* = 8.2 Hz, 1H), 8.38 (d, *J* = 8.5 Hz, 1H), 8.21 – 8.09 (m, 3H), 8.07 (s, 1H), 7.84 (s, 1H), 7.71 (dddd, *J* = 46.5, 21.2, 15.8, 7.8 Hz, 6H), 5.76 (d,

*J* = 4.8 Hz, 1H), 5.37 (t, *J* = 6.1 Hz, 1H), 3.10 (q, *J* = 8.4 Hz, 1H), 2.70 (q, *J* = 13.0, 10.3 Hz, 2H), 2.58 (q, *J* = 10.3, 8.0 Hz, 2H), 1.82 (dd, *J* = 13.3, 8.6 Hz, 1H), 1.65 (s, 1H), 1.44 (ddp, *J* = 43.3, 23.6, 8.1, 7.1 Hz, 6H), 0.85 (t, *J* = 7.3 Hz, 3H). <sup>13</sup>C NMR (101 MHz, Methanol-*d*<sub>4</sub> and Chloroform-*d* (3:1)) δ 159.27, 150.42, 148.03, 137.44, 131.46, 131.02, 130.78, 130.50, 129.93, 129.75, 129.34, 128.93, 127.58, 127.25, 127.02, 127.00, 126.65, 124.74, 123.28, 123.12, 122.83, 120.93, 71.14, 60.20, 51.04, 50.37, 37.33, 26.93, 26.34, 25.15, 19.87, 12.01. HRMS (ESI/[M+H]<sup>+</sup>): Calculated for C<sub>33</sub>H<sub>33</sub>N<sub>2</sub>O requires m/z 473.2587, found m/z 473.2587.

## 2.2 Preparation of cinchonine-derived phase-transfer catalysts (PTC)

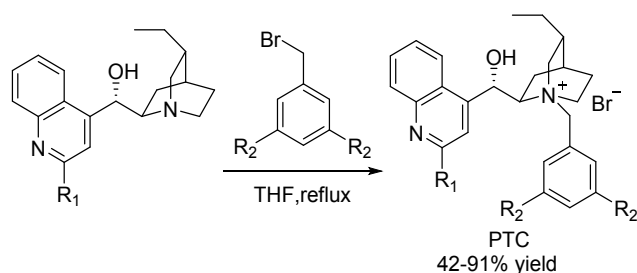

The phase-transfer catalysts (PTCs) were synthesized according to known procedures. To a flame-dried flask equipped with a magnetic stirring bar and a reflux condenser, the Cn-3 (0.2 mmol), the desired bromide (0.24 mmol) and THF (4 mL) were added. The mixture was heated to reflux under N<sub>2</sub> for 12 hours. The mixture was cooled to room temperature and poured into Et<sub>2</sub>O and isolated by filtration. Then, the crude product was recrystallized from MeOH/Et<sub>2</sub>O to afford corresponding product.

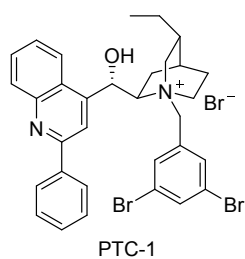

The general procedure was followed using Cn-3-1 (0.075 g, 0.2 mmol), 1,3-dibromo-5-(bromomethyl)benzene (0.079 g, 0.24 mmol). The product PTC-1 was obtained as a white solid (0.105 g, 0.15 mmol, 75% yield).

$[\alpha]_D^{20} = +79.3$  (c 0.1, MeOH); m.p. 257-258 °C; <sup>1</sup>H NMR (400 MHz, Methanol-*d*<sub>4</sub>) δ 8.31 (d, *J* = 7.5 Hz, 1H), 8.25 (s, 1H), 8.11 (d, *J* = 7.5 Hz, 2H), 7.95 (d, *J* = 7.5 Hz, 3H), 7.78 (s, 1H), 7.58 (t, *J* = 7.4 Hz, 2H), 7.54

(d, *J* = 7.0 Hz, 1H), 7.47 (dd, *J* = 10.0, 5.5 Hz, 2H), 6.43 (s, 1H), 5.62 (d, *J* = 12.1 Hz, 1H), 5.09 (d, *J* = 12.1 Hz, 1H), 4.16 (dt, *J* = 29.1, 10.3 Hz, 3H), 3.35 (t, *J* = 5.7 Hz, 1H), 2.86 (q, *J* = 10.2 Hz, 1H), 2.23 (t, *J* = 12.2 Hz, 1H), 1.89 (s, 1H), 1.73 (dq, *J* = 43.6, 10.1, 9.5 Hz, 3H), 1.57 (hept, *J* = 6.8 Hz, 2H), 0.92 (q, *J* = 8.4, 7.2 Hz, 4H). <sup>13</sup>C NMR (101 MHz, Methanol-*d*<sub>4</sub> and Chloroform-*d* (5:2)) δ 157.47, 147.80, 145.77, 139.59, 136.58, 135.53, 131.36, 130.00, 129.92, 129.72, 129.23, 128.09,

127.92, 123.86, 123.53, 123.35, 118.20, 68.09, 66.00, 60.88, 57.08, 56.79, 36.17, 24.72, 24.46, 24.34, 21.57, 11.52. HRMS (ESI/[M-Br]<sup>+</sup>): Calculated for C<sub>32</sub>H<sub>33</sub>Br<sub>2</sub>N<sub>2</sub>O requires m/z 619.0954, found m/z 619.0958.

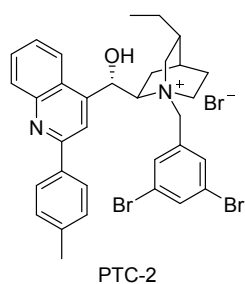

The general procedure was followed using Cn-3-2 (0.077 g, 0.2 mmol), 1,3-dibromo-5-(bromomethyl)benzene (0.079 g, 0.24 mmol). The product PTC-2 was obtained as a white solid (0.125 g, 0.174 mmol, 87% yield).

$[\alpha]_D^{20} = +129.3$  (c 0.1, CHCl<sub>3</sub>); m.p. 243-245 °C; <sup>1</sup>H NMR (400 MHz, DMSO-*d*<sub>6</sub>) δ 8.29 (d, *J* = 11.5 Hz, 2H), 8.21 (d, *J* = 7.9 Hz, 2H), 8.15 (d, *J* = 8.4 Hz, 1H), 8.10 (s, 3H), 7.86 (t, *J* = 7.7 Hz, 1H), 7.72 (t, *J* = 7.6 Hz, 1H), 7.41 (d, *J* = 7.8 Hz, 2H), 6.76 (s, 1H), 6.47 (s, 1H), 5.06 (d, *J* = 12.4 Hz, 1H), 4.86 (d, *J* = 12.4 Hz, 1H), 3.90 (ddd, *J* = 45.7, 21.3, 9.9 Hz, 3H), 3.51 (t, *J* = 11.2 Hz, 1H), 3.00 (q, *J* = 10.1 Hz, 1H), 2.42 (s, 3H), 2.39 – 2.31 (m, 1H), 1.91 – 1.64 (m, 4H), 1.54 (dt, *J* = 14.0, 7.0 Hz, 2H), 1.10 (q, *J* = 10.2, 6.6 Hz, 1H), 0.87 (t, *J* = 7.3 Hz, 3H). <sup>13</sup>C NMR (101 MHz, Chloroform-*d*) δ 156.27, 147.32, 144.34, 139.38, 137.16, 136.30, 135.15, 131.10, 129.77, 129.63, 128.38, 127.64, 126.90, 123.49, 123.11, 122.27, 117.29, 67.55, 65.91, 59.57, 56.62, 56.17, 36.09, 24.50, 24.30, 23.98, 21.67, 21.48, 15.36, 11.45. HRMS (ESI/[M-Br]<sup>+</sup>): Calculated for C<sub>33</sub>H<sub>35</sub>Br<sub>2</sub>N<sub>2</sub>O requires m/z 633.1111, found m/z 633.1107.

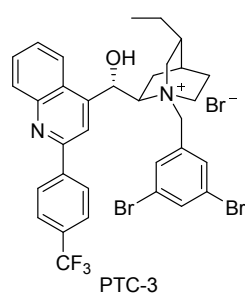

The general procedure was followed using Cn-3-3 (0.088 g, 0.2 mmol), 1,3-dibromo-5-(bromomethyl)benzene (0.079 g, 0.24 mmol). The product PTC-3 was obtained as a white solid (0.112 g, 0.146 mmol, 73% yield).

$[\alpha]_D^{20} = +107.3$  (c 0.1, MeOH); m.p. 246-248 °C; <sup>1</sup>H NMR (400 MHz, DMSO-*d*<sub>6</sub>) δ 8.54 (d, *J* = 8.1 Hz, 2H), 8.42 (s, 1H), 8.35 (d, *J* = 8.4 Hz, 1H), 8.22 (d, *J* = 8.4 Hz, 1H), 8.10 (d, *J* = 4.2 Hz, 3H), 7.97 (d, *J* = 8.2 Hz, 2H), 7.91 (t, *J* = 7.7 Hz, 1H), 7.79 (t, *J* = 7.6 Hz, 1H), 6.81 (d, *J* = 3.6 Hz, 1H), 6.51 (s, 1H), 5.09 (d, *J* = 12.4 Hz, 1H), 4.87 (d, *J* = 12.4 Hz, 1H), 3.93 (ddd, *J* = 35.1, 19.0, 8.0 Hz, 3H), 3.51 (t, *J* = 11.1 Hz, 1H), 3.00 (q, *J* = 10.0 Hz, 1H), 2.37 (t, *J* = 11.8 Hz, 1H), 1.90 – 1.65 (m, 4H), 1.56 (h, *J* = 6.7 Hz, 2H), 1.12 (dq, *J* = 13.7, 7.4, 5.6 Hz, 1H), 0.87 (t, *J* = 7.3 Hz, 3H). <sup>13</sup>C NMR (101 MHz, DMSO-*d*<sub>6</sub>) δ 154.08, 147.62, 146.66, 142.37, 135.49, 135.04, 132.54, 130.11, 129.71 (q, *J* = 31.3 Hz), 128.09, 127.74, 125.87 – 125.75 (m), 124.25 (q, *J* = 273.7 Hz, CF<sub>3</sub>), 123.94, 123.78, 122.77, 117.26, 67.87, 65.05, 60.26, 56.19, 56.06, 34.82, 24.06, 23.61, 20.29, 11.36. HRMS (ESI/[M-Br]<sup>+</sup>): Calculated for C<sub>33</sub>H<sub>32</sub>Br<sub>2</sub>F<sub>3</sub>N<sub>2</sub>O requires m/z 687.0828, found m/z 687.0825.

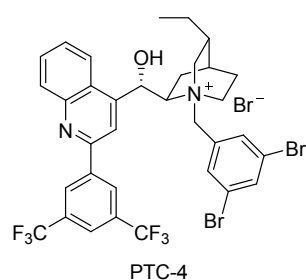

The general procedure was followed using Cn-3-4 (0.102 g, 0.2 mmol), 1,3-dibromo-5-(bromomethyl)benzene (0.079 g, 0.24 mmol). The product PTC-4 was obtained as a white solid (0.07 g, 0.084 mmol, 42% yield).  $[\alpha]_D^{20} = +91.1$  (c 0.1, CHCl<sub>3</sub>); m.p. 288-289 °C; <sup>1</sup>H

NMR (400 MHz, DMSO-*d*<sub>6</sub>) δ 8.91 (s, 2H), 8.54 (s, 1H), 8.38 (d, *J* = 8.4 Hz, 1H), 8.33 (s, 1H), 8.28 (d, *J* = 8.4 Hz, 1H), 8.11 (s, 3H), 7.94 (t, *J* = 7.7 Hz, 1H), 7.82 (t, *J* = 7.6 Hz, 1H), 6.81 (s, 1H), 6.53 (s, 1H), 5.07 (d, *J* = 12.5 Hz, 1H), 4.85 (d, *J* = 12.5 Hz, 1H), 4.04 – 3.76 (m, 3H), 3.52 (t, *J* = 11.2 Hz, 1H),

3.00 (q,  $J = 10.1$  Hz, 1H), 2.40 (t,  $J = 11.8$  Hz, 1H), 1.94 – 1.64 (m, 4H), 1.56 (dt,  $J = 14.2, 7.1$  Hz, 2H), 1.09 (s, 1H), 0.87 (t,  $J = 7.3$  Hz, 3H).  $^{13}\text{C}$  NMR (101 MHz,  $\text{DMSO-}d_6$ )  $\delta$  152.12, 147.39, 147.15, 140.97, 135.47, 135.04, 132.67, 130.9 (q,  $J = 32.3$  Hz), 130.09, 127.89, 127.59, 124.15, 124.10, 123.33 (q,  $J = 273.71$  Hz,  $\text{CF}_3$ ), 122.91, 122.74, 117.04, 68.21, 65.45, 60.03, 56.14, 55.89, 34.90, 24.09, 23.67, 23.59, 20.41, 11.35. HRMS (ESI/[M-Br] $^+$ ): Calculated for  $\text{C}_{34}\text{H}_{31}\text{Br}_2\text{F}_6\text{N}_2\text{O}$  requires  $m/z$  755.0702, found  $m/z$  755.0706.

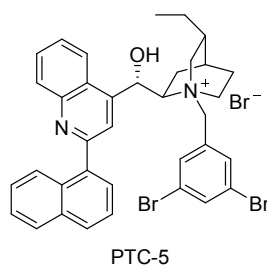

The general procedure was followed using Cn-3-5 (0.085 g, 0.2 mmol), 1,3-dibromo-5-(bromomethyl)benzene (0.079 g, 0.24 mmol). The product PTC-5 was obtained as a white solid (0.084 g, 0.112 mmol, 56% yield).  $[\alpha]_D^{20} = +97.8$  (c 0.1, MeOH); m.p. 252-254 °C;  $^1\text{H}$  NMR (400 MHz,  $\text{DMSO-}d_6$ )  $\delta$  8.40 (d,  $J = 8.4$  Hz, 1H), 8.19 (t,  $J = 7.5$  Hz, 2H), 8.15 – 8.01 (m, 6H), 7.93 (t,  $J = 7.7$  Hz, 1H), 7.82 (t,  $J = 7.1$  Hz, 2H), 7.72 (t,  $J = 7.8$  Hz, 1H), 7.62 (t,  $J = 7.5$  Hz, 1H), 7.55 (t,  $J = 7.6$  Hz, 1H), 6.76 (s, 1H), 6.54 (s, 1H), 5.11 (d,  $J = 12.4$  Hz, 1H), 4.88 (d,  $J = 12.5$  Hz, 1H), 4.09 – 3.79 (m, 3H), 3.50 (t,  $J = 11.5$  Hz, 1H), 3.01 (q,  $J = 10.0$  Hz, 1H), 2.33 (t,  $J = 11.8$  Hz, 1H), 1.75 (dt,  $J = 35.0, 11.1$  Hz, 3H), 1.47 (h,  $J = 7.2$  Hz, 2H), 1.26 (dd,  $J = 16.5, 9.3$  Hz, 1H), 0.83 (t,  $J = 7.4$  Hz, 3H).  $^{13}\text{C}$  NMR (101 MHz, Chloroform- $d$ )  $\delta$  158.18, 146.91, 144.64, 138.54, 136.29, 135.13, 134.12, 131.18, 131.04, 129.73, 129.38, 128.74, 128.59, 127.99, 127.32, 126.69, 126.08, 125.77, 125.55, 123.52, 123.46, 122.16, 121.60, 67.33, 65.60, 59.56, 56.59, 56.17, 35.94, 24.44, 24.20, 23.89, 21.71, 11.36. HRMS (ESI/[M-Br] $^+$ ): Calculated for  $\text{C}_{36}\text{H}_{35}\text{Br}_2\text{N}_2\text{O}$  requires  $m/z$  669.1111, found  $m/z$  669.1109.

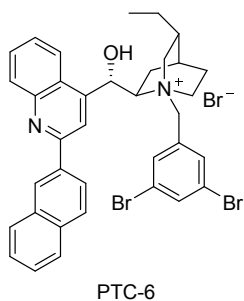

The general procedure was followed using Cn-3-6 (0.085 g, 0.2 mmol), 1,3-dibromo-5-(bromomethyl)benzene (0.079 g, 0.24 mmol). The product PTC-6 was obtained as a white solid (0.136 g, 0.181 mmol, 91% yield).  $[\alpha]_D^{20} = +142.8$  (c 0.1,  $\text{CHCl}_3$ ); m.p. 249-251 °C;  $^1\text{H}$  NMR (400 MHz,  $\text{DMSO-}d_6$ )  $\delta$  8.87 (s, 1H), 8.51 (d,  $J = 9.0$  Hz, 2H), 8.33 (d,  $J = 8.4$  Hz, 1H), 8.22 (t,  $J = 8.8$  Hz, 2H), 8.13 (d,  $J = 17.3$  Hz, 4H), 8.06 – 7.99 (m, 1H), 7.90 (t,  $J = 7.7$  Hz, 1H), 7.76 (t,  $J = 7.6$  Hz, 1H), 7.68 – 7.56 (m, 2H), 6.82 (s, 1H), 6.51 (s, 1H), 5.08 (d,  $J = 12.4$  Hz, 1H), 4.86 (d,  $J = 12.4$  Hz, 1H), 3.99 (t,  $J = 10.6$  Hz, 1H), 3.88 (d,  $J = 13.7$  Hz, 2H), 3.65 – 3.45 (m, 2H), 3.01 (q,  $J = 10.2$  Hz, 1H), 2.43 (t,  $J = 11.6$  Hz, 1H), 1.86 (s, 1H), 1.82 – 1.68 (m, 3H), 1.58 (h,  $J = 6.6$  Hz, 2H), 1.21 – 1.10 (m, 1H), 0.89 (t,  $J = 7.3$  Hz, 3H).  $^{13}\text{C}$  NMR (101 MHz, Chloroform- $d$ )  $\delta$  155.93, 147.59, 144.35, 136.32, 135.15, 133.88, 133.54, 131.13, 129.98, 129.02, 128.53, 127.77, 127.18, 126.69, 126.33, 125.19, 123.55, 123.37, 117.46, 68.04, 67.82, 59.66, 56.67, 56.19, 36.13, 25.69, 24.52, 24.33, 24.01, 21.73, 11.47. HRMS (ESI/[M-Br] $^+$ ): Calculated for  $\text{C}_{36}\text{H}_{35}\text{Br}_2\text{N}_2\text{O}$  requires  $m/z$  669.1111, found  $m/z$  669.1109.

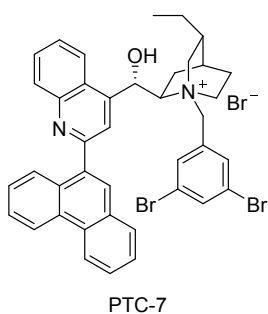

The general procedure was followed using Cn-3-7 (0.095 g, 0.2 mmol), 1,3-dibromo-5-(bromomethyl)benzene (0.079 g, 0.24 mmol). The product PTC-7 was obtained as a white solid (0.120 g, 0.15 mmol, 75% yield).  $[\alpha]_D^{20} = +25$  (c 0.1,  $\text{CHCl}_3$ ); m.p. 251-253 °C;  $^1\text{H}$  NMR (400





J<sup>+</sup>): Calculated for C<sub>36</sub>H<sub>35</sub>Cl<sub>2</sub>N<sub>2</sub>O requires m/z 581.2121, found m/z 581.2120.

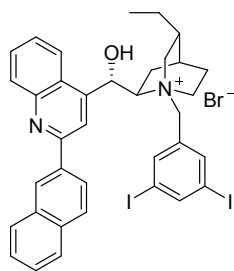

PTC-10

The general procedure was followed using Cn-3-6 (0.095 g, 0.2 mmol), 1,3-diiodo-5-(iodomethyl)benzene (0.113 g, 0.24 mmol). The product PTC-10 was obtained as a white solid (0.105 g, 0.124 mmol, 62% yield).

$[\alpha]_D^{20} = +142.3$  (c 0.1,  $\text{CHCl}_3$ ); m.p. 240-241 °C;  $^1\text{H NMR}$  (400 MHz,

Chloroform-*d*)  $\delta$  8.64 (s, 1H), 8.53 – 8.28 (m, 3H), 8.10 (d,  $J = 11.3$  Hz, 4H), 7.97 (d,  $J = 8.5$  Hz, 1H), 7.87 (d,  $J = 7.8$  Hz, 1H), 7.69 (d,  $J = 8.1$  Hz, 1H), 7.54 (p,  $J = 7.0$  Hz, 2H), 7.06 (dt,  $J = 20.4, 7.0$  Hz, 2H), 6.67 (d,  $J =$

5.6 Hz, 1H), 6.54 – 6.38 (m, 1H), 6.24 (d,  $J = 11.9$  Hz, 1H), 5.25 (d,  $J = 11.9$  Hz, 1H), 4.20 (q,  $J = 9.3$  Hz, 2H), 4.09 (t,  $J = 11.3$  Hz, 1H), 3.20 (t,  $J = 10.6$  Hz, 1H), 2.66 (q,  $J = 10.1$  Hz, 1H), 2.09 (t,  $J = 12.3$  Hz, 1H), 1.86 (s, 1H), 1.79 – 1.59 (m, 3H), 1.49 (dq,  $J = 21.3, 13.5, 10.9$  Hz, 3H), 0.83 (q,  $J = 7.2$  Hz, 3H).  $^{13}\text{C NMR}$  (101 MHz, Chloroform-*d*)  $\delta$  156.02, 147.68, 147.57, 144.46, 141.45, 137.00, 133.94, 133.60, 131.17, 130.02, 129.07, 128.67, 128.56, 127.80, 127.25, 126.72, 126.35, 125.25, 123.50, 122.83, 117.55, 95.42, 67.95, 59.55, 56.70, 56.26, 36.21, 24.57, 24.42, 24.04, 21.75, 11.51. HRMS (ESI/[M-Br] $^+$ ): Calculated for  $\text{C}_{36}\text{H}_{35}\text{I}_2\text{N}_2\text{O}$  requires  $m/z$  765.0833, found  $m/z$  765.0834.

### 3. General procedure in the flow photomicroreactors

#### 3.1 The general procedure in the flow photomicroreactor

Due to the limitations of the microreactor material, the reaction conditions were not exactly the same as the batch. Substrate 1 (0.1 mmol), 20 mol% PTC-6 and 0.1 mol% TPP were dissolved in 10 mL of PhCH<sub>3</sub>. In the pump 1, the PhCH<sub>3</sub> (organic phase) flow rate was 1.5 mL/min, and in the pump 2, 10% K<sub>2</sub>HPO<sub>4</sub> solution (aqueous phase) flow rate was 1.5 mL/min. O<sub>2</sub> flow rate was 10 mL/min and the reaction pressure was 3 atm. The reaction was carried out at 0°C under white light. After completion of the reaction, the mixture was diluted with EtOAc (50 mL), washed with water (3×20 mL), dried over anhydrous Na<sub>2</sub>SO<sub>4</sub>, filtered, and concentrated in vacuo. The residue was purified by column chromatography on silica gel (petroleum ether/ethyl acetate = 10/1, 5/1) to afford the product 2. The ee of the product was determined by chiral HPLC.

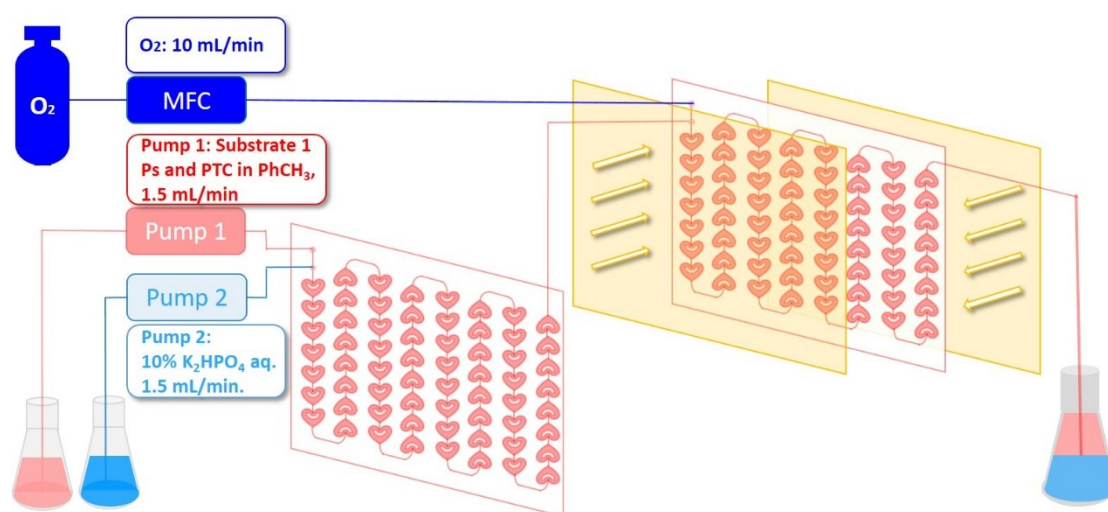

**Figure S1.** Schematic representation of flow photomicroreactor for asymmetric photocatalytic oxidation of  $\beta$ -dicarbonyl compounds

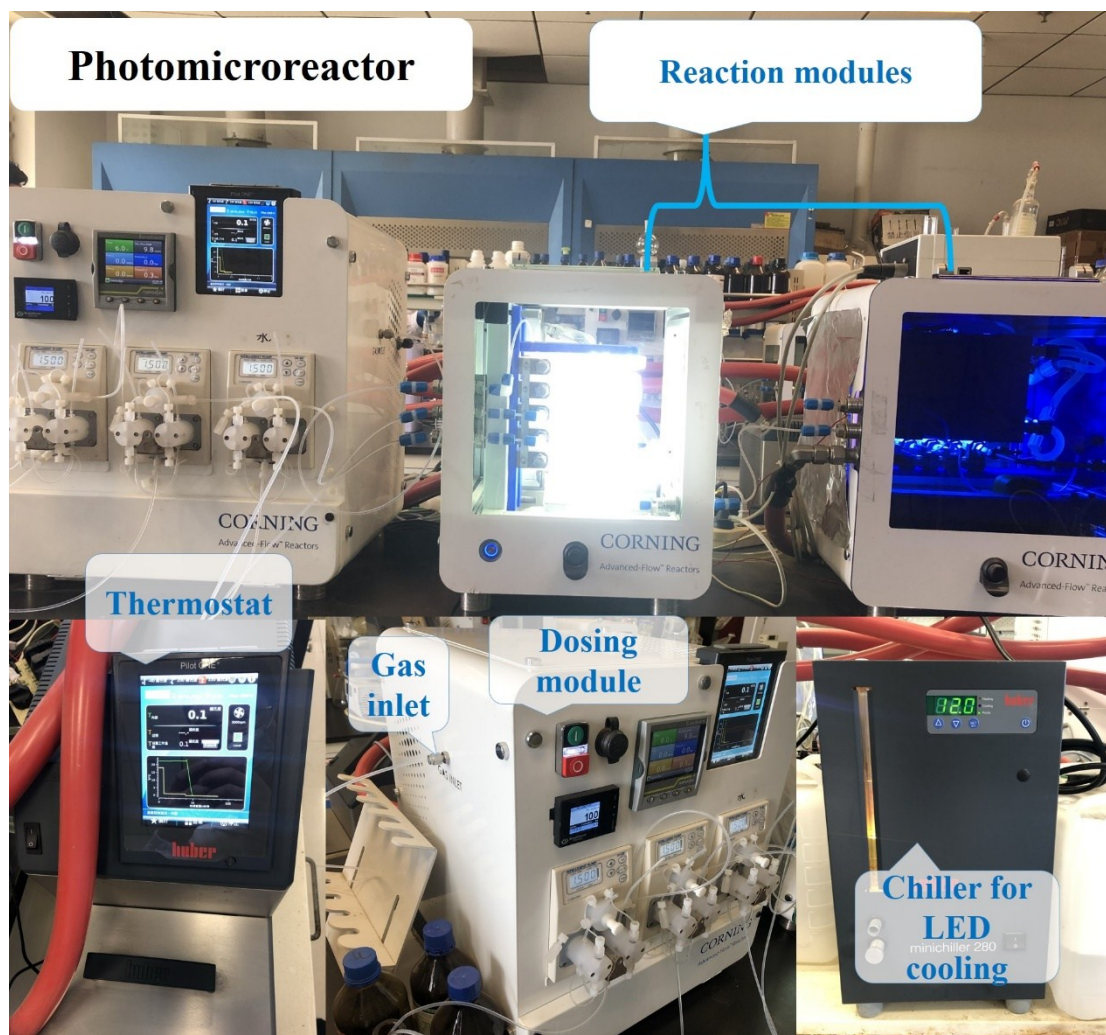

**Figure S2.** Corning Advanced Flow Reactor. The reaction system contains a dosing module, two reaction modules, two thermostat (for controlling the reaction temperature) and a chiller (for LED cooling). The dosing module equipped with 3 liquid dosing lines (based on HPLC type metal free pumps), a gas dosing line (using mass flow gas controller, with control panel), a thermostat control panel and a gas control panel. The two reaction modules were both equipped with a back pressure regulator at the outlet.  $O_2$  in an oxygen cylinder was transfer to the reaction system with the gas inlet in the dosing module. The reaction mixture was inlet to the reaction modules with the liquid dosing line in the dosing module.

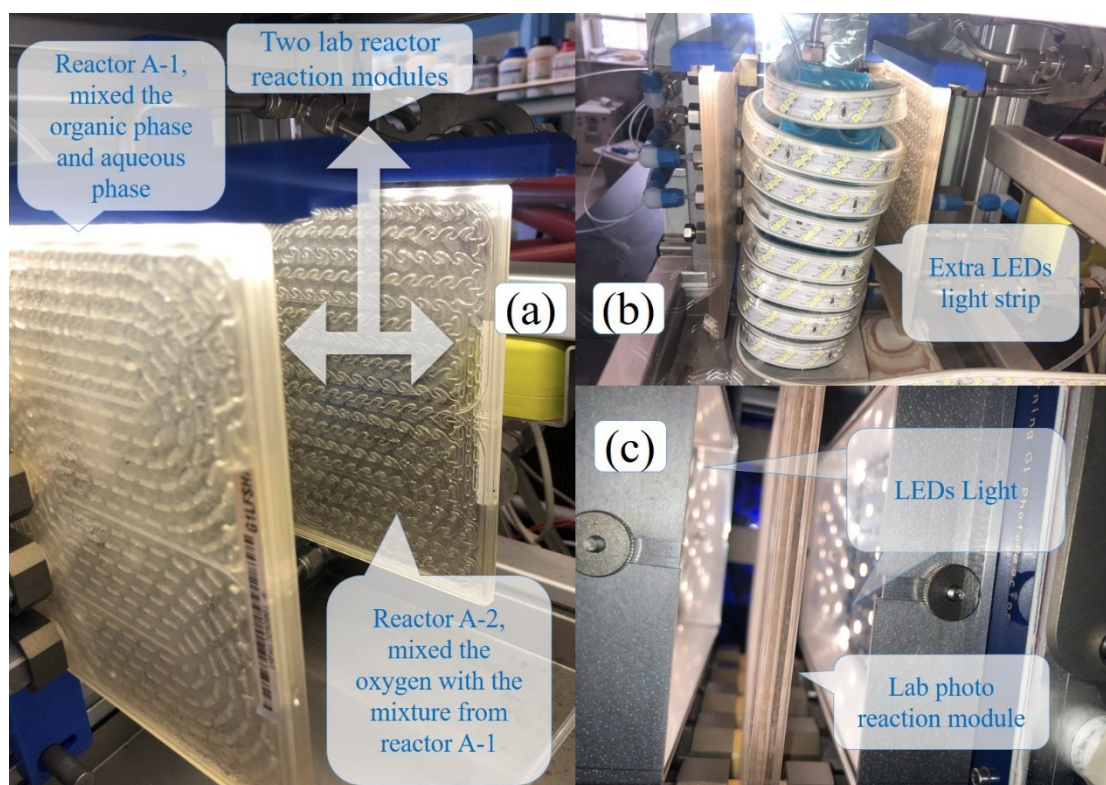

**Figure S3.** The description of the light for the reaction in the flow photomicroreactor. (a) Two lab reactor reaction modules (Reactor A-1 and A-2, L×W×H: 155 mm×125 mm×8 mm) have no photo module to provide light. Organic phase and aqueous phase was mixed in the Reactor A-1, and after that, it was mixed with oxygen in the Reactor A-2. (b) The white LEDs light strip (2 m, 20W, (10 W/m, 4000K)) was wrapped around a shelf and then put the shelf between the two lab reactor reaction modules to provide light. (c) The lab photo reaction module (Reactor A-3, L×W×H: 155 mm×125 mm×8 mm) has a LEDs Light module (original) to provide light (20 W, 4000 K, 100 mW/cm<sup>2</sup>, white light). And the mixture reacted in the Reactor A-2 and A-3 under white light.

### 3.2 The resident time in the flow photomicroreactor

$$Resident\ time = \frac{V}{v_{liq} + v_{gas}}$$

$$v_{liq} = v_1 + v_2$$

$$v_{gas} = \frac{T^* \times p}{T \times p^*} \times v_{O_2}$$

Therefore:

$$Resident\ time = \frac{V}{v_1 + v_2 + \frac{T^* \times p}{T \times p^*} \times v_{O_2}}$$

$V$  refers to the total volume of the reaction module (Reactor A-2 and Reactor A-3),  $V=5.4$  mL.

$v_{liq}$  and  $v_{O_2}$  refer to the flow rate of the reaction mixture and O<sub>2</sub>, respectively.  $v_1$  refers to the flow rate of the organic phase (pump 1) and  $v_2$  refers to the flow rate of the aqueous phase (pump 2).  $v_1=1.5$  mL/min, and  $v_2=1.5$  mL/min.  $v_{gas}$  refers to the flow rate of the oxygen in the reactor under pressure, and  $p$  is 1 atm (standard state), and  $p^*$  is the reaction pressure,  $T$  is 298.15 K and  $T^*$  is

the reaction temperature.  $v_{o_2} = 10$  mL/min.

#### 4. Control experiments and mechanistic studies

##### 4.1 Radical Trapping Experiments<sup>3</sup>

According to Tan's report<sup>4</sup>,  $\alpha$ -oxyamination **7a** was synthesised from  $\beta$ -dicarbonyl compounds **1a** by visible-light-induced photocatalytic oxidation with 43% yield. However, addition of 2 equiv. TEMPO into our reaction systems still produced the  $\alpha$ -hydroxylation product **2a** with 96% yield and 90% ee. And, no  $\alpha$ -oxyamination were detected from the reaction mixture. According to these results, we believe that the radical pathway is not crucial in the current reaction.

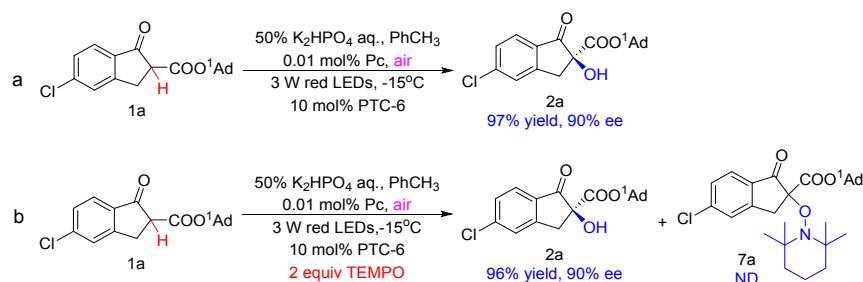

##### 1-adamantanyl-5-chloro-1-oxo-2-((2,2,6,6-tetramethylpiperidin-1-yl)oxy)-2,3-dihydro-1H-indene-2-carboxylate (**7a**):

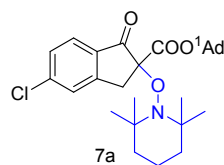

$^1H$  NMR (500 MHz, Chloroform-*d*)  $\delta$  7.66 (d,  $J = 8.1$  Hz, 1H), 7.46 (d,  $J = 1.7$  Hz, 1H), 7.32 (dd,  $J = 8.2, 1.7$  Hz, 1H), 4.57 (d,  $J = 17.7$  Hz, 1H), 3.29 (d,  $J = 17.7$  Hz, 1H), 2.14 – 2.08 (m, 3H), 2.02 (d,  $J = 3.0$  Hz, 6H), 1.60 (t,  $J = 3.0$  Hz, 6H), 1.58 – 1.51 (m, 2H), 1.48 – 1.40 (m, 2H), 1.33 (s, 3H), 1.33 – 1.25 (m, 2H), 1.18 (s, 3H), 1.10 (s, 3H), 0.56 (s, 3H).  $^{13}C$  NMR (101 MHz, Chloroform-*d*)  $\delta$  200.30, 168.35, 154.68, 141.74, 132.99, 128.13, 126.20, 125.51, 89.92, 82.74, 60.48, 59.36, 40.91, 40.44, 40.18, 35.92, 33.82, 32.29, 31.97, 30.75, 20.77, 20.46, 16.89. HRMS calculated for  $C_{29}H_{39}ClNO_4$  [(M+H)<sup>+</sup>]: 500.2562, found: 500.2560.

##### 4.2 Study for Singlet Oxygen

We carried out control experiments trying to verify the presence of photoexcited singlet oxygen. When the singlet oxygen quencher, 1,4-diazabicyclo[2.2.2]octane (DABCO), was added to the **1a** reaction system, a greatly reduced product yield and enantioselectivity was observed (7% yield and 16% ee).

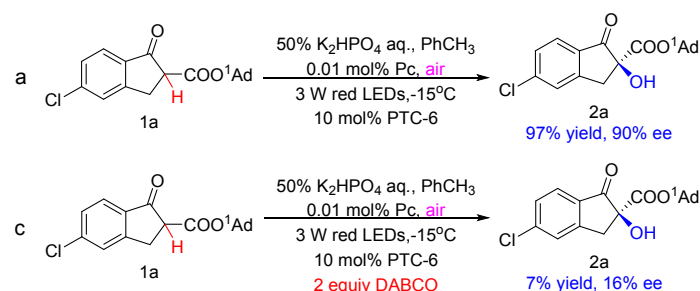

### 4.3 Study for the $\alpha$ -Hydroperoxide Intermediate

With further research, the  $\alpha$ -hydroperoxide  $\beta$ -ketoester intermediate **6a** has been observed by HRMS of the reaction solution. In the photomicroreactor (CORNING Advanced-Flow Reactors), substrate **1a** (0.1 mmol), PTC-6 (10 mol%) and TPP (5 mol%) were dissolved in toluene (10 mL). Under 5 atm of O<sub>2</sub> and visible light generated from a white LED lamp (100mW/cm<sup>2</sup>) at 0 °C, the residence time was 1.12 minutes. Under this condition, the  $\alpha$ -hydroperoxide **6a** was detected by HRMS. However, because of the strong oxidability and instability of **6a**, we could not get the separated pure **6a**.

20190315-TXF-M376-#5-9 RT: 0.04-0.08 AV: 5 SB: 3 0.01-0.03 NL: 1.28E6  
T: FTMS + p ESI Full ms [120.00-1000.00]

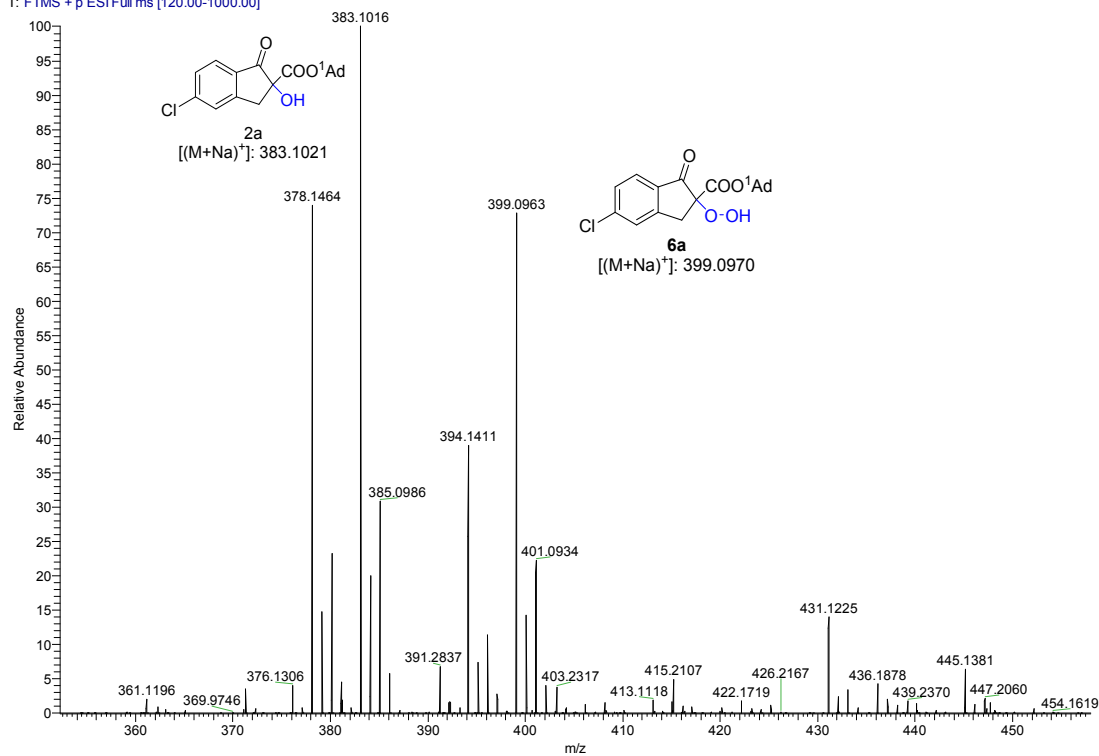



## 5. General procedure for the asymmetric $\alpha$ -hydroxylation of $\beta$ -dicarbonyl compounds

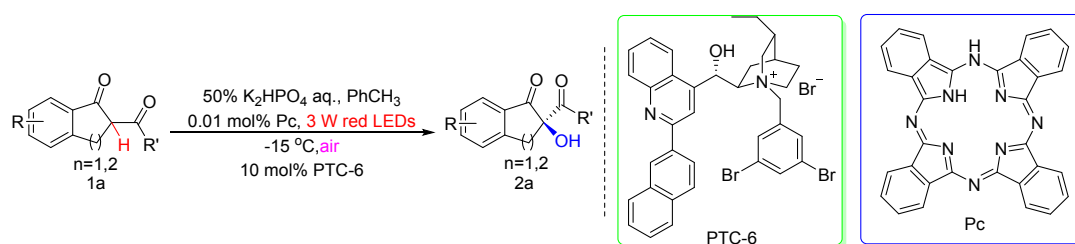

Substrate **1** (0.1 mmol), PTC-6 (10 mol %), 50%  $\text{K}_2\text{HPO}_4$  aq (4 mL) and Pc (0.01 mol %) were added to a test tube equipped with a stirring bar and dissolved in  $\text{PhCH}_3$  (10 mL). It was stirred at  $-15\text{ }^\circ\text{C}$  covered by a 3W LED red lamp. After completion of the reaction (confirmed by TLC), the mixture was diluted with EtOAc (50 mL), washed with water ( $3 \times 20$  mL), dried over anhydrous  $\text{Na}_2\text{SO}_4$ , filtered, and concentrated in vacuo. The residue was purified by column chromatography on silica gel (petroleum ether/ethyl acetate = 10/1, 5/1) to afford the product **2a-2t**. The ee of the product was determined by chiral HPLC.

### (S)-1-adamantanyl 2-hydroxy-5-chloro-1-oxo-2,3-dihydro-1H-indene-2-carboxylate (**2a**)

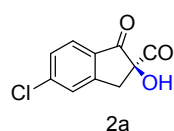

Prepared according to the general procedure with a reaction time of 8 hours. After column chromatography (silica gel, petroleum ether/ethyl acetate = 10/1) to give **2a** as white solid (35.0 mg, 97% yield, 90% ee).  $[\alpha]_D^{20} = +81.6$  (c 0.1,  $\text{CHCl}_3$ ); m.p.  $152\text{--}156\text{ }^\circ\text{C}$ ;  $^1\text{H NMR}$  (400 MHz, Chloroform-*d*)  $\delta$  7.72 (d,  $J = 8.2$  Hz, 1H), 7.48 (s, 1H), 7.44 – 7.35 (m, 1H), 4.04 (s, 1H), 3.63 (d,  $J = 17.3$  Hz, 1H), 3.20 (d,  $J = 17.3$  Hz, 1H), 2.13 (s, 3H), 1.97 (d,  $J = 3.0$  Hz, 6H), 1.61 (d,  $J = 2.9$  Hz, 6H). HPLC conditions: Chiralpak AD-H column ( $250 \times 4.6$  mm), hexane/*i*-PrOH = 80:20, 1.0 mL/min; 254 nm,  $\tau_R$  (major) = 11.3 min,  $\tau_R$  (minor) = 18.3 min.

### (S)-1-adamantanyl 2-hydroxy-1-oxo-2,3-dihydro-1H-indene-2-carboxylate (**2b**)

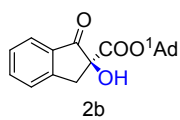

Prepared according to the general procedure with a reaction time of 8 hours. After column chromatography (silica gel, petroleum ether/ethyl acetate = 10/1) to give **2b** as colorless oil (31.3 mg, 96% yield, 86% ee).  $[\alpha]_D^{20} = +30.0$  (c 0.1,  $\text{CHCl}_3$ );  $^1\text{H NMR}$  (400 MHz, Chloroform-*d*)  $\delta$  7.79 (d,  $J = 7.6$  Hz, 1H), 7.64 (t,  $J = 7.4$  Hz, 1H), 7.47 (d,  $J = 7.7$  Hz, 1H), 7.41 (t,  $J = 7.5$  Hz, 1H), 4.01 (s, 1H), 3.66 (d,  $J = 17.1$  Hz, 1H), 3.22 (d,  $J = 17.1$  Hz, 1H), 2.18 – 2.07 (m, 3H), 1.96 (d,  $J = 2.9$  Hz, 6H), 1.60 (t,  $J = 2.9$  Hz, 6H). HPLC conditions: Chiralpak AD-H column ( $250 \times 4.6$  mm), hexane/*i*-PrOH = 80:20, 1.0 mL/min; 254 nm,  $\tau_R$  (major) = 10.7 min,  $\tau_R$  (minor) = 16.9 min.

### (S)-1-Adamantanyl 2-hydroxy-5-bromo-1-oxo-2,3-dihydro-1H-indene-2-carboxylate (**2c**)

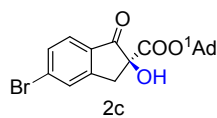

Prepared according to the general procedure with a reaction time of 8 hours. After column chromatography (silica gel, petroleum ether/ethyl acetate = 10/1) to give **2c** as white solid (38.9 mg, 96% yield, 89% ee).  $[\alpha]_D^{20} = +79.0$  (c 0.1,  $\text{CHCl}_3$ ); m.p.  $192\text{--}194\text{ }^\circ\text{C}$ ;  $^1\text{H NMR}$  (400 MHz, Chloroform-*d*)  $\delta$  7.65 (d,  $J = 9.4$  Hz, 2H),

7.56 (d,  $J = 8.1$  Hz, 1H), 4.01 (s, 1H), 3.63 (d,  $J = 17.3$  Hz, 1H), 3.20 (d,  $J = 17.3$  Hz, 1H), 2.13 (t,  $J = 3.3$  Hz, 3H), 1.97 (d,  $J = 2.9$  Hz, 6H), 1.61 (d,  $J = 3.0$  Hz, 6H). HPLC conditions: Chiralpak AD-H column (250×4.6mm), hexane/*i*-PrOH = 80:20, 1.0 mL/min; 254 nm,  $\tau_R$  (major) = 12.5 min,  $\tau_R$  (minor) = 20.3 min.

**(S)-1-Adamantanyl 2-hydroxy-6-fluoro-1-oxo-2,3-dihydro-1H-indene-2-carboxylate (2d)**

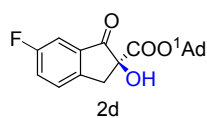

Prepared according to the general procedure with a reaction time of 8 hours. After column chromatography (silica gel, petroleum ether/ethyl acetate = 10/1) to give **2d** as white solid (31.7 mg, 92% yield, 84% ee).  $[\alpha]_D^{20} = +22.4$  (c 0.1,

CHCl<sub>3</sub>); m.p. 58-60 °C; <sup>1</sup>H NMR (400 MHz, Chloroform-*d*)  $\delta$  7.44 (td,  $J = 7.6, 6.5, 3.4$  Hz, 2H), 7.36 (td,  $J = 8.4, 2.5$  Hz, 1H), 4.04 (s, 1H), 3.61 (d,  $J = 16.9$  Hz, 1H), 3.18 (d,  $J = 16.9$  Hz, 1H), 2.13 (d,  $J = 4.1$  Hz, 3H), 1.96 (d,  $J = 2.9$  Hz, 6H), 1.60 (d,  $J = 3.0$  Hz, 6H). HPLC conditions: Chiralpak AD-H column (250×4.6mm), hexane/*i*-PrOH = 80:20, 1.0 mL/min; 254 nm,  $\tau_R$  (major) = 9.1 min,  $\tau_R$  (minor) = 16.5 min.

**(S)-1-Adamantyl 2-hydroxy-6-methoxy-1-oxo-2,3-dihydro-1H-indene-2-carboxylate (2e)**

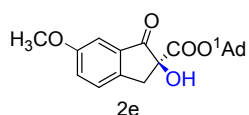

Prepared according to the general procedure with a reaction time of 8 hours. After column chromatography (silica gel, petroleum ether/ethyl acetate = 10/1) to give **2e** as white solid (32.8 mg, 92% yield, 79% ee).

$[\alpha]_D^{20} = +20.5$  (c 0.1, CHCl<sub>3</sub>); <sup>1</sup>H NMR (400 MHz, Chloroform-*d*)  $\delta$  7.36 (d,  $J = 8.3$  Hz, 1H), 7.26 – 7.16 (m, 2H), 4.02 (s, 1H), 3.85 (s, 3H), 3.58 (d,  $J = 16.8$  Hz, 1H), 3.13 (d,  $J = 16.7$  Hz, 1H), 2.18 – 2.07 (m, 3H), 1.98 (d,  $J = 3.0$  Hz, 6H), 1.60 (d,  $J = 3.1$  Hz, 6H). HPLC conditions: Chiralpak AD-H column (250×4.6mm), hexane/*i*-PrOH = 80:20, 1.0 mL/min; 254 nm,  $\tau_R$  (major) = 12.5 min,  $\tau_R$  (minor) = 20.6 min.

**(S)-1-Adamantyl 2-hydroxy-5,6-dimethoxy-1-oxo-2,3-dihydro-1H-indene-2-carboxylate (2f)**

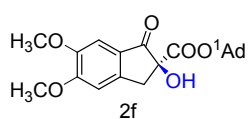

Prepared according to the general procedure with a reaction time of 8 hours. After column chromatography (silica gel, petroleum ether/ethyl acetate = 5/1) to give **2f** as white solid (35.2 mg, 91% yield, 80% ee).

$[\alpha]_D^{20} = +73.2$  (c 0.1, CHCl<sub>3</sub>); m.p. 145-148 °C; <sup>1</sup>H NMR (400 MHz, Chloroform-*d*)  $\delta$  7.19 (s, 1H), 6.88 (s, 1H), 3.99 (d,  $J = 2.9$  Hz, 4H), 3.92 (s, 3H), 3.57 (d,  $J = 16.8$  Hz, 1H), 3.12 (d,  $J = 16.8$  Hz, 1H), 2.22 – 2.11 (m, 3H), 2.00 (d,  $J = 3.0$  Hz, 6H), 1.61 (d,  $J = 3.0$  Hz, 6H). HPLC conditions: Chiralpak AD-H column (250×4.6mm), hexane/*i*-PrOH = 80:20, 1.0 mL/min; 254 nm,  $\tau_R$  (major) = 19.0 min,  $\tau_R$  (minor) = 30.9 min.

**(S)-1-Adamantyl 2-hydroxy-6-methyl-1-oxo-2,3-dihydro-1H-indene-2-carboxylate (2g)**

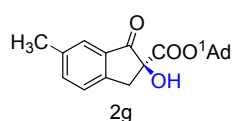

Prepared according to the general procedure with a reaction time of 8 hours. After column chromatography (silica gel, petroleum ether/ethyl acetate = 10/1) to give **2g** as white solid (30.3 mg, 89% yield, 78% ee).

$[\alpha]_D^{20} = +35.8$  (c 0.1, CHCl<sub>3</sub>); m.p. 113-115 °C; <sup>1</sup>H NMR (400 MHz,

Chloroform-*d*  $\delta$  7.58 (s, 1H), 7.46 (dd,  $J = 8.0, 1.6$  Hz, 1H), 7.35 (d,  $J = 7.9$  Hz, 1H), 3.99 (s, 1H), 3.61 (d,  $J = 16.9$  Hz, 1H), 3.15 (d,  $J = 17.0$  Hz, 1H), 2.41 (s, 3H), 2.12 (t,  $J = 3.4$  Hz, 3H), 1.97 (d,  $J = 3.0$  Hz, 6H), 1.60 (d,  $J = 3.0$  Hz, 6H). HPLC conditions: Chiralpak AD-H column (250 $\times$ 4.6mm), hexane/*i*-PrOH = 80:20, 1.0 mL/min; 254 nm,  $\tau_R$  (major) = 9.4 min,  $\tau_R$  (minor) = 16.1 min.

**(S)-2-Adamantyl 2-hydroxy-1-oxo-2,3-dihydro-1H-indene-2-carboxylate (2h)**

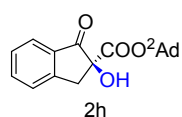

Prepared according to the general procedure with a reaction time of 8 hours. After column chromatography (silica gel, petroleum ether/ethyl acetate = 10/1) to give **2h** as white solid (30.0 mg, 92% yield, 77% ee).  $[\alpha]_D^{20} = +19.2$  (c 0.1, CHCl<sub>3</sub>); m.p. 58-59 °C; <sup>1</sup>H NMR (400 MHz, Chloroform-*d*) δ 7.81 (d, *J* = 7.7 Hz, 1H), 7.66 (t, *J* = 7.5 Hz, 1H), 7.50 (d, *J* = 7.7 Hz, 1H), 7.42 (t, *J* = 7.5 Hz, 1H), 4.96 (s, 1H), 4.03 (s, 1H), 3.71 (d, *J* = 17.0 Hz, 1H), 3.30 (d, *J* = 17.0 Hz, 1H), 1.94 – 1.83 (m, 2H), 1.81 – 1.60 (m, 8H), 1.41 (d, *J* = 3.5 Hz, 2H), 1.33 – 1.24 (m, 2H). HPLC conditions: Chiralpak AD-H column (250×4.6mm), hexane/*i*-PrOH = 95:5, 1.0 mL/min; 254 nm, τ<sub>R</sub> (major) = 21.7 min, τ<sub>R</sub> (minor) = 28.5 min.

**(S)-2-Adamantyl 2-hydroxy-4-methoxyl-1-oxo-2,3-dihydro-1H-indene-2-carboxylate (2i)**

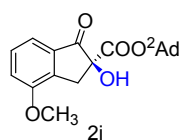

Prepared according to the general procedure with a reaction time of 8 hours. After column chromatography (silica gel, petroleum ether/ethyl acetate = 10/1) to give **2i** as colorless oil (31.4 mg, 88% yield, 77% ee).  $[\alpha]_D^{20} = +38.4$  (c 0.1, CHCl<sub>3</sub>); <sup>1</sup>H NMR (400 MHz, Chloroform-*d*) δ 7.39 (d, *J* = 4.3 Hz, 2H), 7.10 (p, *J* = 4.1 Hz, 1H), 5.01 – 4.90 (m, 1H), 4.02 (s, 1H), 3.91 (s, 3H), 3.66 (d, *J* = 17.4 Hz, 1H), 3.13 (d, *J* = 17.4 Hz, 1H), 1.89 (dd, *J* = 29.2, 3.6 Hz, 2H), 1.81 – 1.57 (m, 8H), 1.50 – 1.37 (m, 2H), 1.36 – 1.25 (m, 2H). <sup>13</sup>C NMR (101 MHz, Chloroform-*d*) δ 201.36, 170.87, 156.80, 141.08, 135.55, 129.63, 116.59, 116.29, 81.05, 79.78, 55.77, 37.23, 36.47, 36.21, 36.12, 31.84, 31.59, 31.57, 31.41, 27.02, 26.82. HRMS calculated for C<sub>21</sub>H<sub>25</sub>O<sub>5</sub> [(M+H)<sup>+</sup>]: 357.1697, found: 357.1695. HPLC conditions: Chiralpak AD-H column (250×4.6mm), hexane/*i*-PrOH = 90:10, 1.0 mL/min; 254 nm, τ<sub>R</sub> (major) = 24.7 min, τ<sub>R</sub> (minor) = 34.4 min.

**(S)-3-ethylpentan-3-yl 2-hydroxy-6-methoxyl-1-oxo-2,3-dihydro-1H-indene-2-carboxylate (2j)**

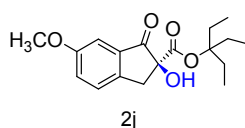

Prepared according to the general procedure with a reaction time of 8 hours. After column chromatography (silica gel, petroleum ether/ethyl acetate = 10/1) to give **2j** as colorless oil (26.6 mg, 83% yield, 66% ee).  $[\alpha]_D^{20} = +22.4$  (c 0.1, CHCl<sub>3</sub>); <sup>1</sup>H NMR (400 MHz, Chloroform-*d*) δ 7.36 (d, *J* = 8.2 Hz, 1H), 7.26 – 7.18 (m, 2H), 4.04 (s, 1H), 3.85 (s, 3H), 3.56 (d, *J* = 16.7 Hz, 1H), 3.16 (d, *J* = 16.7 Hz, 1H), 1.71 (qd, *J* = 7.5, 1.5 Hz, 6H), 0.67 (t, *J* = 7.5 Hz, 9H). HPLC conditions: Chiralpak AD-H column (250×4.6mm), hexane/*i*-PrOH = 95:5, 1.5 mL/min; 254 nm, τ<sub>R</sub> (minor) = 13.6 min, τ<sub>R</sub> (major) = 15.5 min.

**(S)-3-ethylpentan-3-yl 5-chloro-2-hydroxy-1-oxo-2,3-dihydro-1H-indene-2-carboxylate (2k)**

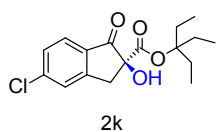

Prepared according to the general procedure with a reaction time of 8 hours. After column chromatography (silica gel, petroleum ether/ethyl acetate = 10/1) to give **2k** as white solid (29.9 mg, 92% yield, 64% ee).  $[\alpha]_D^{20} = +24.6$  (c 0.1, CHCl<sub>3</sub>); m.p. 133-135 °C; <sup>1</sup>H NMR (400 MHz, Chloroform-*d*) δ 7.72 (d, *J* = 8.2 Hz, 1H), 7.48 (s, 1H), 7.40 (d, *J* = 8.2 Hz, 1H), 4.05 (s, 1H), 3.61 (d, *J* = 17.2 Hz, 1H), 3.23 (d, *J* = 17.2 Hz, 1H), 1.71 (q, *J* = 7.5 Hz, 6H), 0.67 (t, *J* = 7.5 Hz, 9H).

HPLC conditions: Chiralpak AS-H column (250×4.6mm), hexane/i-PrOH = 90:10, 1.0 mL/min;  
254 nm,  $\tau_R$  (minor) = 8.2 min,  $\tau_R$  (major) = 9.9 min.

**(S)-*t*-butyl 2-hydroxy-5,6-dimethoxy-1-oxo-2,3-dihydro-1*H*-indene-2-carboxylate (2l)**

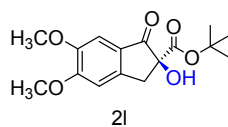

Prepared according to the general procedure with a reaction time of 8 hours. After column chromatography (silica gel, petroleum ether/ethyl acetate = 5/1) to give **2l** as white solid (23.7 mg, 77% yield, 61% ee).

$[\alpha]_D^{20} = +42.4$  (c 0.1, CHCl<sub>3</sub>); m.p. 113-116 °C; <sup>1</sup>H NMR (400 MHz,

Chloroform-*d*) δ 7.19 (s, 1H), 6.89 (s, 1H), 3.99 (s, 3H), 3.98 (s, 1H), 3.92 (s, 3H), 3.57 (d, *J* = 16.8 Hz, 1H), 3.12 (d, *J* = 16.8 Hz, 1H), 1.39 (s, 9H). HPLC conditions: Chiralpak AS-H column (250×4.6mm), hexane/*i*-PrOH = 90:10, 1.0 mL/min; 254 nm, τ<sub>R</sub> (minor) = 31.5 min, τ<sub>R</sub> (major) = 43.9 min.

**(S)-Methyl 2-hydroxy-5-chloro-1-oxo-2,3-dihydro-1*H*-indene-2-carboxylate (2m)**

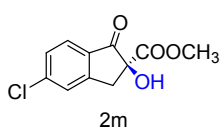

Prepared according to the general procedure with a reaction time of 8 hours. After column chromatography (silica gel, petroleum ether/ethyl acetate = 5/1) to give **2m** as white solid (20.0 mg, 83% yield, 54% ee).

$[\alpha]_D^{20} = +53.6$  (c 0.1, CHCl<sub>3</sub>); m.p. 133-135 °C; <sup>1</sup>H NMR (400 MHz,

Chloroform-*d*) δ 7.74 (dd, *J* = 8.3, 1.9 Hz, 1H), 7.50 (s, 1H), 7.42 (d, *J* = 8.3 Hz, 1H), 4.06 (d, *J* = 2.0 Hz, 1H), 3.78 – 3.74 (m, 3H), 3.71 (d, *J* = 17.5 Hz, 1H), 3.24 (d, *J* = 17.5 Hz, 1H). HPLC conditions: Chiralpak OD-H column (250×4.6mm), hexane/*i*-PrOH = 90:10, 1.0 mL/min; 254 nm, τ<sub>R</sub> (major) = 13.2 min, τ<sub>R</sub> (minor) = 16.2 min.

**(S)-1-Adamantyl 2-hydroxy-1-oxo-1,2,3,4-tetrahydronaphthalene-2-carboxylate (2n)**

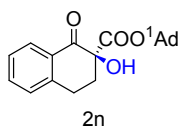

Prepared according to the general procedure with a reaction time of 8 hours. After column chromatography (silica gel, petroleum ether/ethyl acetate = 10/1 ) to give **2n** as yellow solid (27.9 mg, 82% yield, 70% ee).

$[\alpha]_D^{20} = -8.0$  (c 0.1, CHCl<sub>3</sub>); m.p. 95-96 °C; <sup>1</sup>H NMR (400 MHz,

Chloroform-*d*) δ 8.04 (d, *J* = 7.8 Hz, 1H), 7.52 (t, *J* = 7.5 Hz, 1H), 7.34 (t, *J* = 7.6 Hz, 1H), 7.25 (s, 1H), 4.23 (s, 1H), 3.12 (t, *J* = 6.3 Hz, 2H), 2.64 (dt, *J* = 13.6, 5.2 Hz, 1H), 2.22 (dt, *J* = 14.1, 7.6 Hz, 1H), 2.17 – 2.07 (m, 3H), 2.01 (d, *J* = 2.9 Hz, 6H), 1.60 (d, *J* = 3.0 Hz, 6H). HPLC conditions: Chiralpak OD-H column (250×4.6mm), hexane/*i*-PrOH = 90:10, 1.0 mL/min; 254 nm, τ<sub>R</sub> (minor) = 7.4 min, τ<sub>R</sub> (major) = 9.8 min.

**(S)-1-Adamantyl 2-hydroxy-7-methoxy-1-oxo-1,2,3,4-tetrahydronaphthalene-2-carboxylate (2o)**

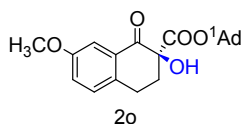

Prepared according to the general procedure with a reaction time of 8 hours. After column chromatography (silica gel, petroleum ether/ethyl acetate = 10/1) to give **2o** as colorless oil (30.7 mg, 83% yield, 65% ee).

$[\alpha]_D^{20} = -12.0$  (c 0.1, CHCl<sub>3</sub>); <sup>1</sup>H NMR (400 MHz, Chloroform-*d*) δ 7.50 (d,

*J* = 2.7 Hz, 1H), 7.17 (d, *J* = 8.5 Hz, 1H), 7.10 (dd, *J* = 8.5, 2.8 Hz, 1H), 4.21 (s, 1H), 3.85 (s, 3H), 3.05 (dd, *J* = 7.4, 5.2 Hz, 2H), 2.62 (dt, *J* = 13.5, 5.1 Hz, 1H), 2.25 – 2.17 (m, 1H), 2.16 – 2.08 (m, 3H), 2.02 (d, *J* = 2.9 Hz, 6H), 1.61 (d, *J* = 3.1 Hz, 6H). HPLC conditions: Chiralpak AD-H column

(250×4.6mm), hexane/i-PrOH = 80:20, 1.0 mL/min; 254 nm,  $\tau_R$  (major) = 10.8 min,  $\tau_R$  (minor) = 17.1 min.

**(S)-1-Adamantyl  
carboxylate (2p)**

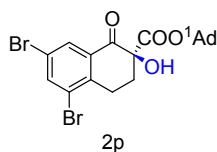

**2-hydroxy-5,7-dibromine-1-oxo-1,2,3,4-tetrahydronaphthalene-2-  
carboxylate (2p)**  
Prepared according to the general procedure with a reaction time of 8 hours. After column chromatography (silica gel, petroleum ether/ethyl acetate = 10/1) to give **2p** as colorless oil (38.4 mg, 77% yield, 59% ee).

$[\alpha]_D^{20} = -1.9$  (c 0.1, CHCl<sub>3</sub>); <sup>1</sup>H NMR (400 MHz, Chloroform-*d*) δ 8.14 (d, *J* = 2.1 Hz, 1H), 7.93 (d, *J* = 2.1 Hz, 1H), 4.10 (s, 1H), 3.11 (dt, *J* = 18.2, 5.6 Hz, 1H), 2.99 (ddd, *J* = 18.2, 9.1, 5.3 Hz, 1H), 2.64 (dt, *J* = 13.9, 5.4 Hz, 1H), 2.23 (td, *J* = 8.9, 4.5 Hz, 1H), 2.18 – 2.10 (m, 3H), 2.01 (d, *J* = 2.9 Hz, 6H), 1.62 (t, *J* = 3.0 Hz, 6H). HPLC conditions: Chiralpak AD-H column (250×4.6mm), hexane/*i*-PrOH = 90:10, 1.0 mL/min; 254 nm, τ<sub>R</sub> (major) = 9.0 min, τ<sub>R</sub> (minor) = 14.7 min.

**(S)- 2-hydroxy-2-(4-methylpiperidine-1-carbonyl)-2,3-dihydro-1H-inden-1-one (2q)**

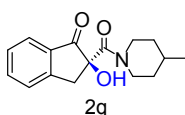

Prepared according to the general procedure with a reaction time of 24 hours. After column chromatography (silica gel, petroleum ether/ethyl acetate = 5/1) to give **2q** as colorless oil (15.6 mg, 57% yield, 72% ee).  $[\alpha]_D^{20} = -16.3$  (c 0.1,

CHCl<sub>3</sub>); <sup>1</sup>H NMR (400 MHz, Chloroform-*d*) δ 7.86 (d, *J* = 7.7 Hz, 1H), 7.67 (td, *J* = 7.5, 1.3 Hz, 1H), 7.54 – 7.40 (m, 2H), 5.54 (d, *J* = 25.8 Hz, 1H), 4.59 (d, *J* = 36.4 Hz, 1H), 3.45 (d, *J* = 17.8 Hz, 1H), 3.31 (d, *J* = 18.1 Hz, 1H), 3.07 (s, 1H), 2.78 (d, *J* = 40.9 Hz, 2H), 1.60 (d, *J* = 29.0 Hz, 3H), 1.01 (d, *J* = 13.9 Hz, 2H), 0.92 (d, *J* = 6.4 Hz, 3H). HPLC conditions: Chiralpak AD-H column (250×4.6mm), hexane/*i*-PrOH = 90:10, 1.0 mL/min; 254 nm, τ<sub>R</sub> (minor) = 25.5 min, τ<sub>R</sub> (major) = 28.6 min.

**(S)-2-hydroxy-N-methyl-1-oxo-N-phenyl-2,3-dihydro-1H-indene-2-carboxamide (2r)**

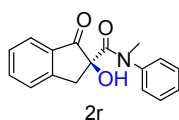

Prepared according to the general procedure with a reaction time of 24 hours. After column chromatography (silica gel, petroleum ether/ethyl acetate = 5/1) to give **2r** as yellow solid (12.9 mg, 46% yield, 54% ee).  $[\alpha]_D^{20} = -15.0$  (c 0.1,

CHCl<sub>3</sub>); m.p. 92-94 °C; <sup>1</sup>H NMR (400 MHz, Chloroform-*d*) δ 7.49 – 7.31 (m, 2H), 7.17 (t, *J* = 7.5 Hz, 1H), 7.12 – 6.65 (m, 6H), 5.41 (s, 1H), 3.55 (d, *J* = 18.0 Hz, 1H), 3.34 (s, 3H), 3.12 (d, *J* = 18.0 Hz, 1H). HPLC conditions: Chiralpak OD-H column (250×4.6mm), hexane/*i*-PrOH = 95:5, 1.0 mL/min; 254 nm, τ<sub>R</sub> (minor) = 33.1 min, τ<sub>R</sub> (major) = 38.0 min.

**(S)-5-bromo-2-hydroxy-1-oxo-N-phenyl-2,3-dihydro-1H-indene-2-carboxamide (2s)**

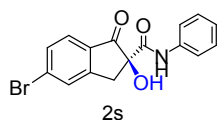

Prepared according to the general procedure with a reaction time of 24 hours. After column chromatography (silica gel, petroleum ether/ethyl acetate = 5/1) to give **2s** as white solid (23.2 mg, 67% yield, 18% ee).  $[\alpha]_D^{20} = +9.2$  (c

0.1, CHCl<sub>3</sub>); m.p. 187-189 °C; <sup>1</sup>H NMR (400 MHz, Methanol-*d*<sub>4</sub>) δ 7.81 – 7.74 (m, 1H), 7.69 – 7.53 (m, 4H), 7.35 – 7.29 (m, 2H), 7.17 – 7.08 (m, 1H), 3.85 (d, *J* = 17.3 Hz, 1H), 3.17 (d, *J* = 17.3 Hz, 1H). HPLC conditions: Chiralpak OD-H column (250×4.6mm), hexane/*i*-PrOH = 90:10, 1.0 mL/min; 254 nm, τ<sub>R</sub> (major) = 23.0 min, τ<sub>R</sub> (minor) = 33.4 min.





**(S)-benzyl -1-hydroxy-2-oxocyclopentane-1-carboxylate (2t)**

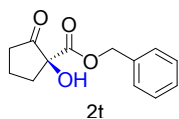

Prepared according to the general procedure with a reaction time of 24 hours. After column chromatography (silica gel, petroleum ether/ethyl acetate = 5/1) to give **2t** as colorless oil (12.9 mg, 55% yield, 4% ee).  $[\alpha]_D^{20} = -0.2$  (c 0.1, CHCl<sub>3</sub>);

<sup>1</sup>H NMR (400 MHz, Chloroform-*d*)  $\delta$  7.36 (td,  $J = 5.4, 2.5$  Hz, 3H), 7.30 (dd,  $J = 7.5, 2.1$  Hz, 2H), 5.22 (q,  $J = 12.2$  Hz, 2H), 3.69 (s, 1H), 2.61 – 2.36 (m, 3H), 2.21 – 1.99 (m, 3H). HPLC conditions: Chiralpak OD-H column (250×4.6mm), hexane/*i*-PrOH = 95:5, 1.0 mL/min; 220 nm,  $\tau_R$  (major) = 14.4 min,  $\tau_R$  (minor) = 16.0 min.

## 6. Copies of NMR Spectra

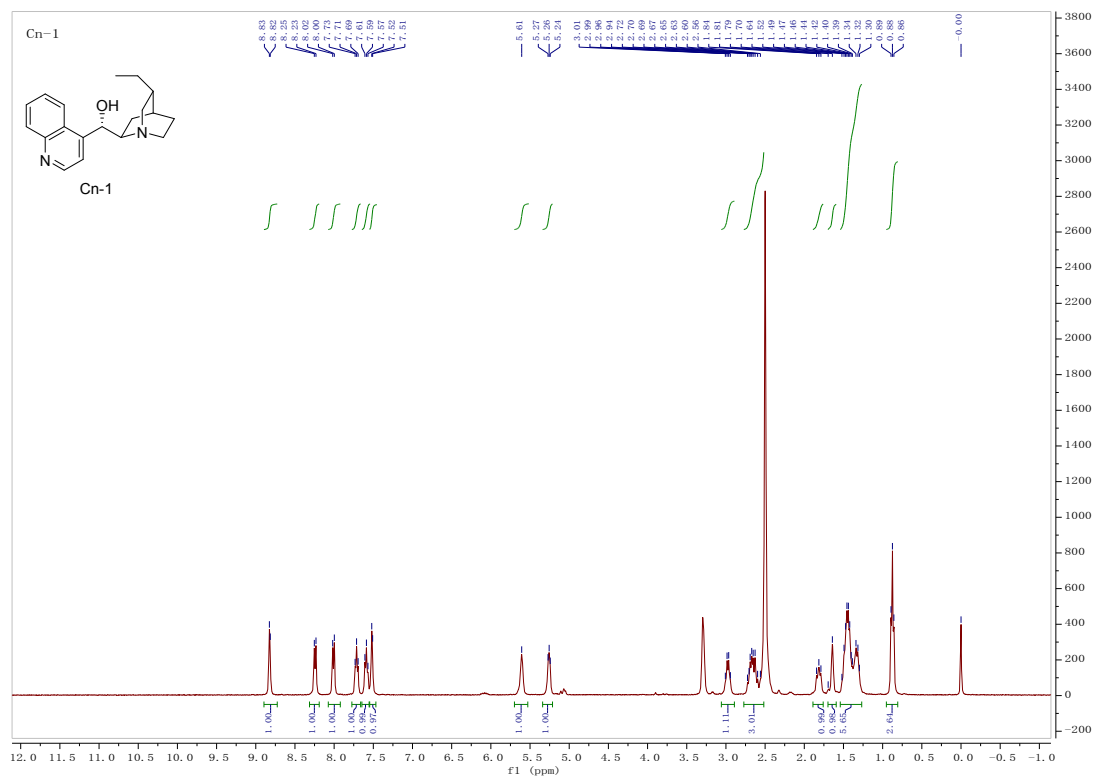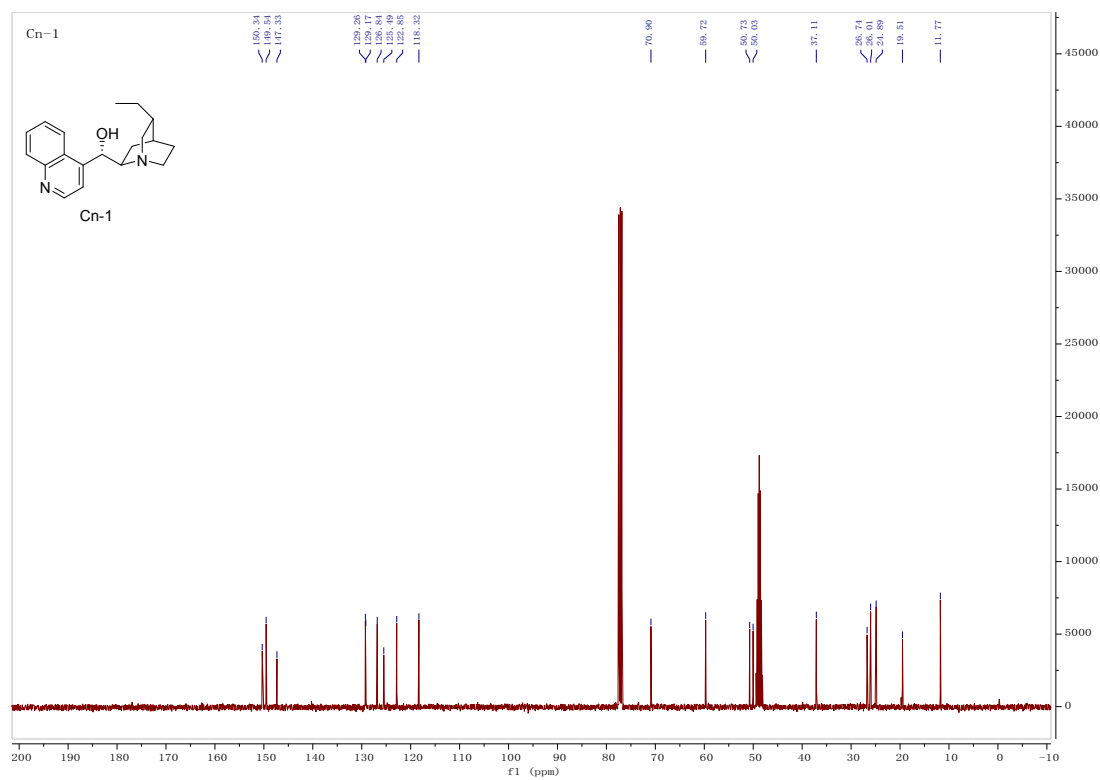





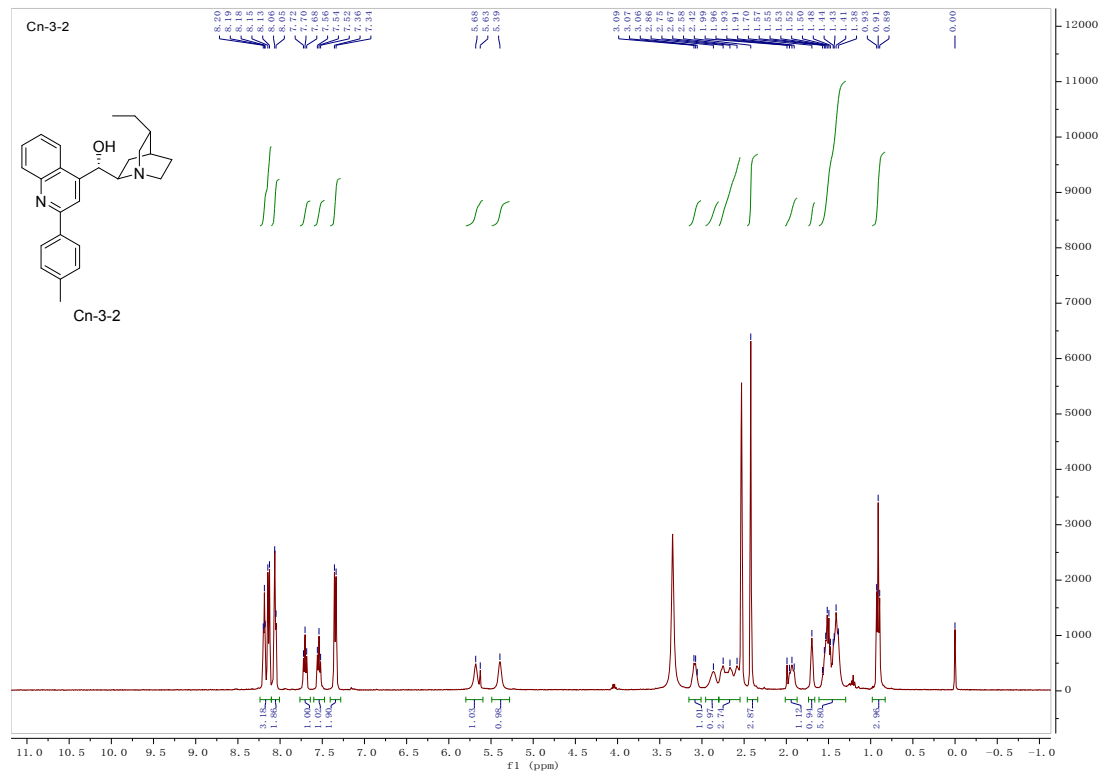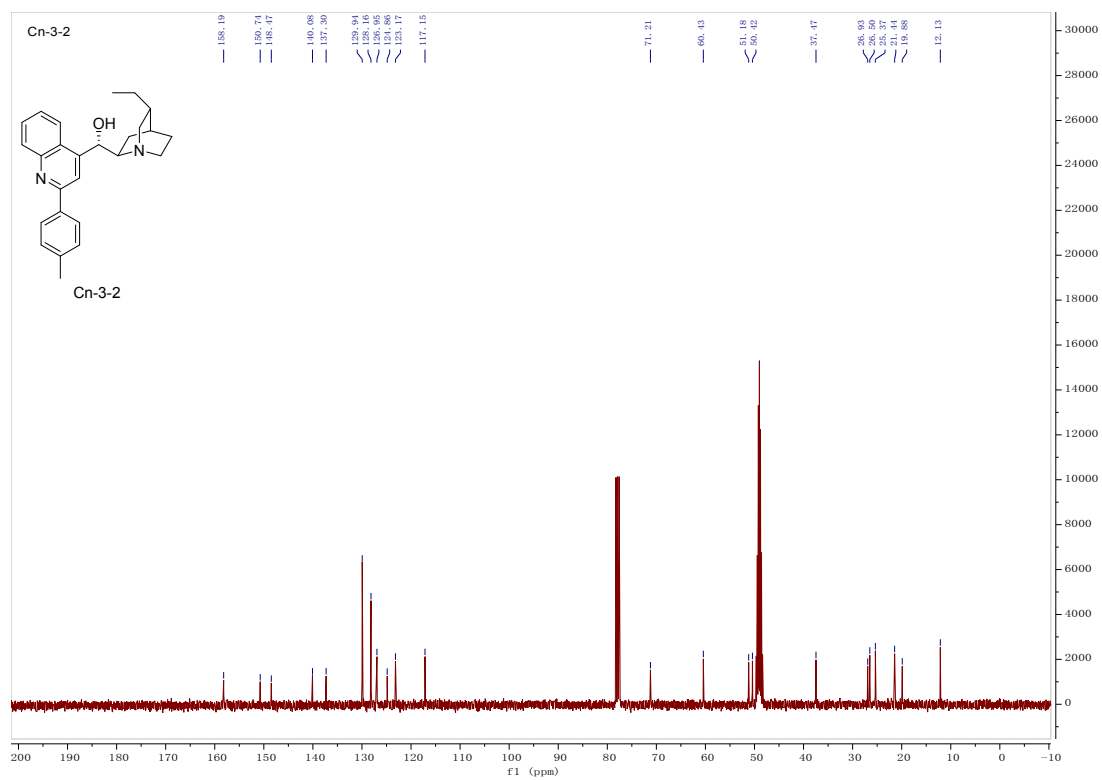



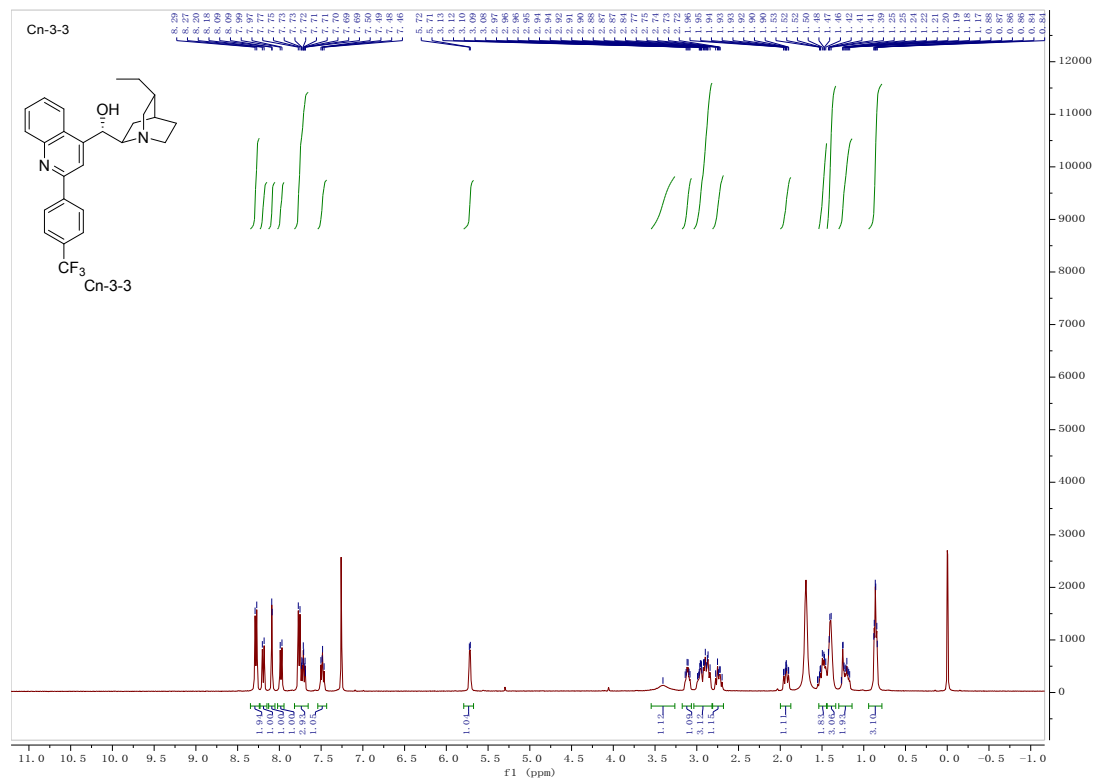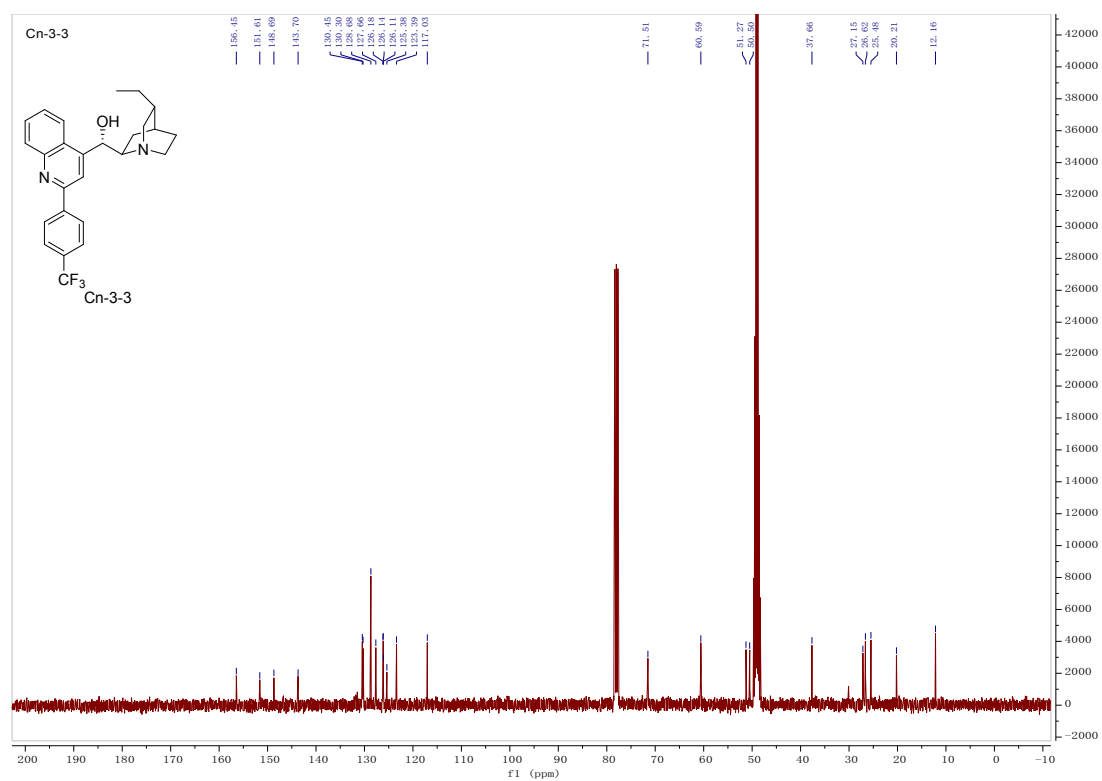





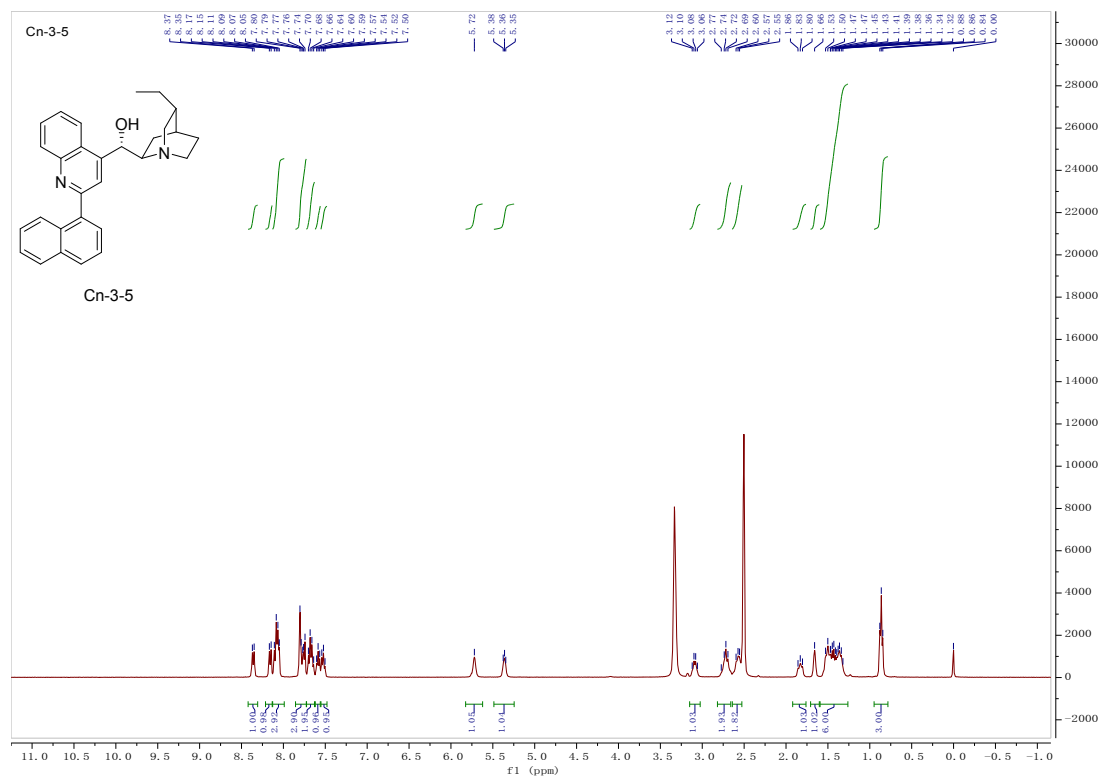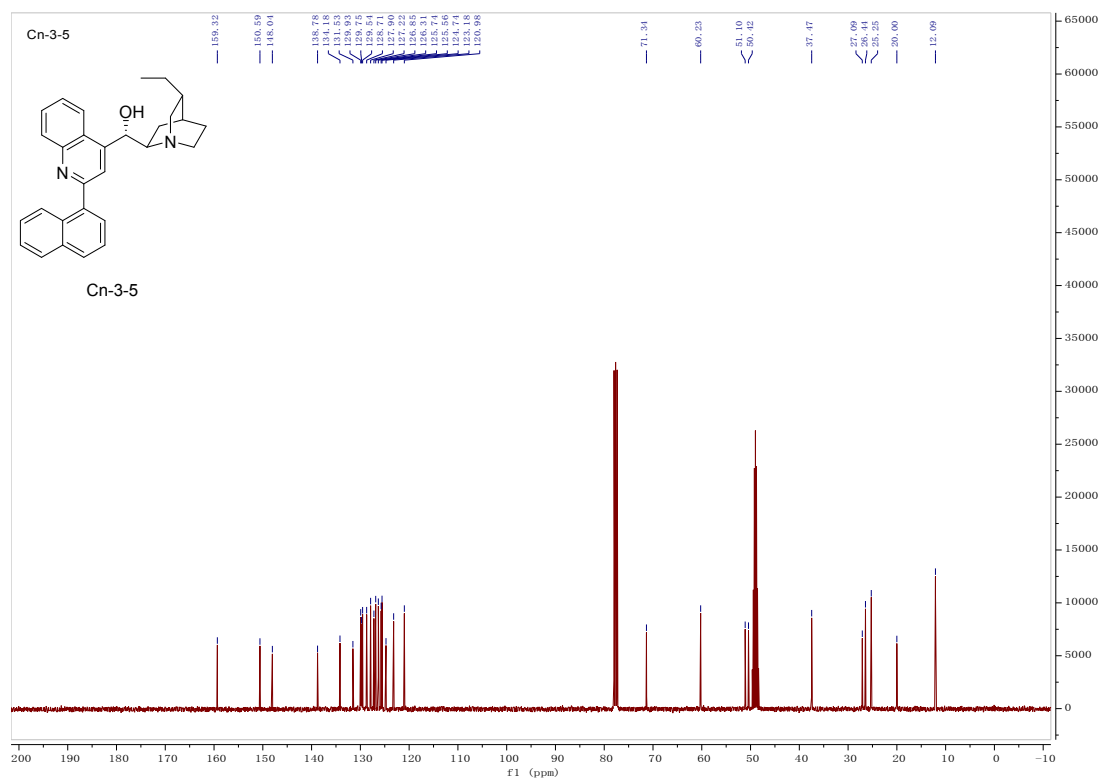



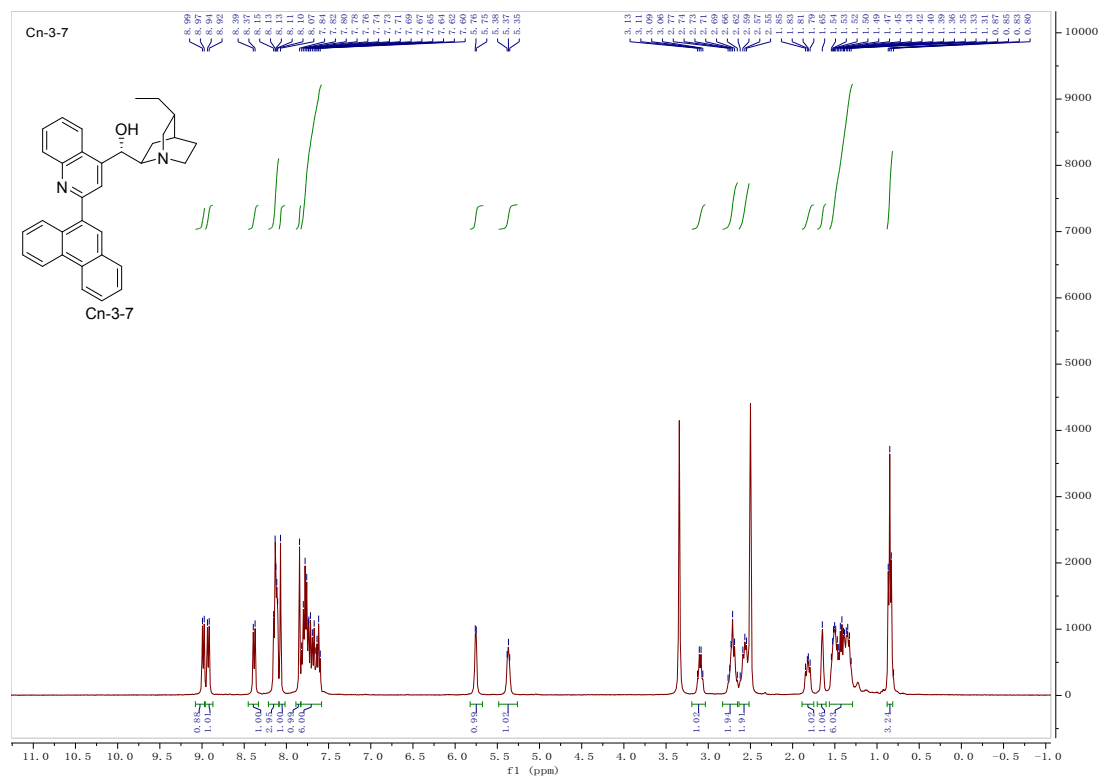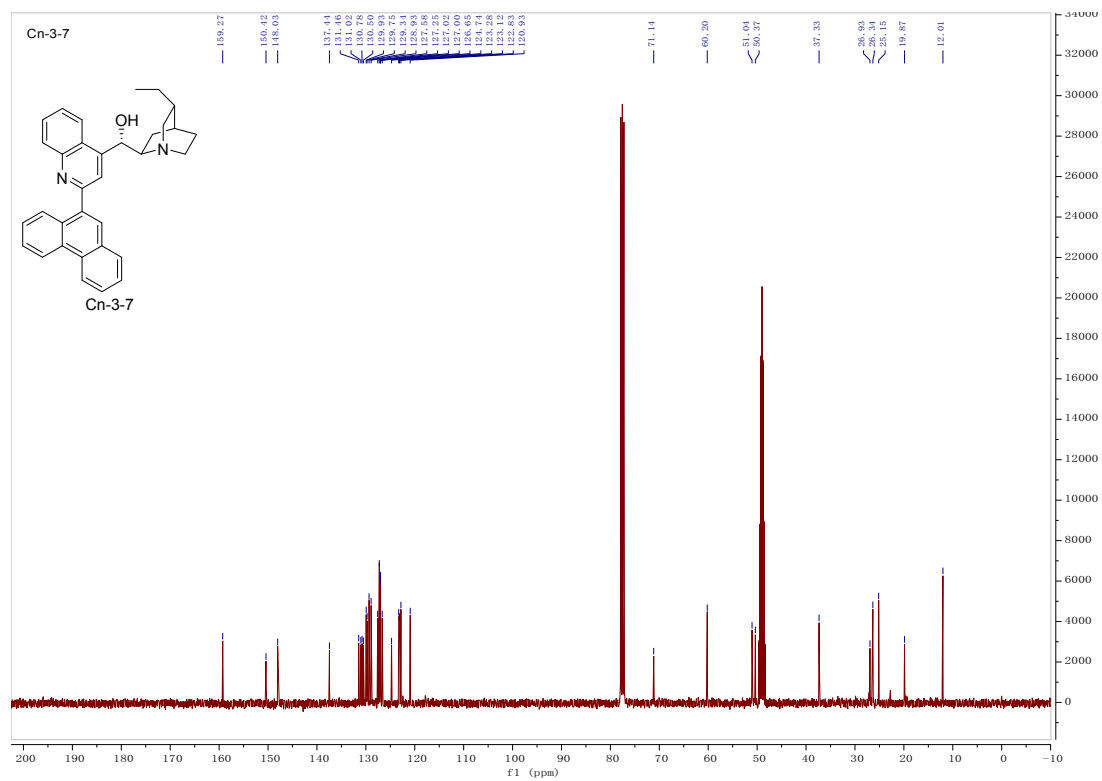

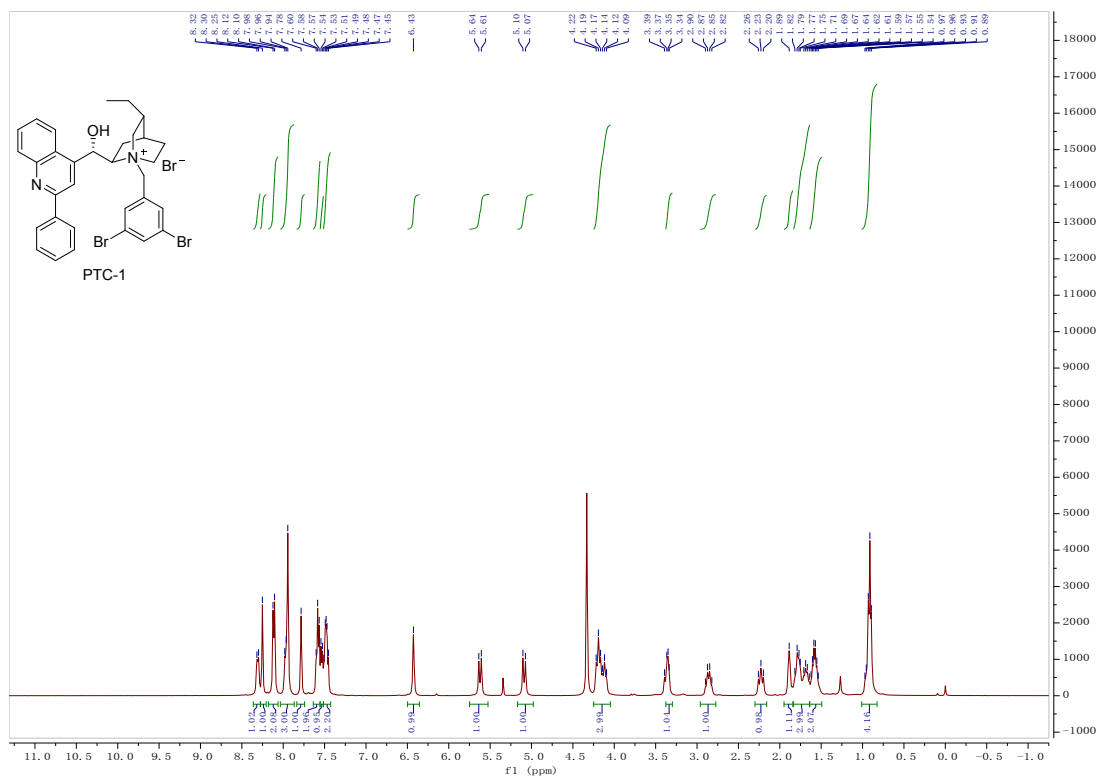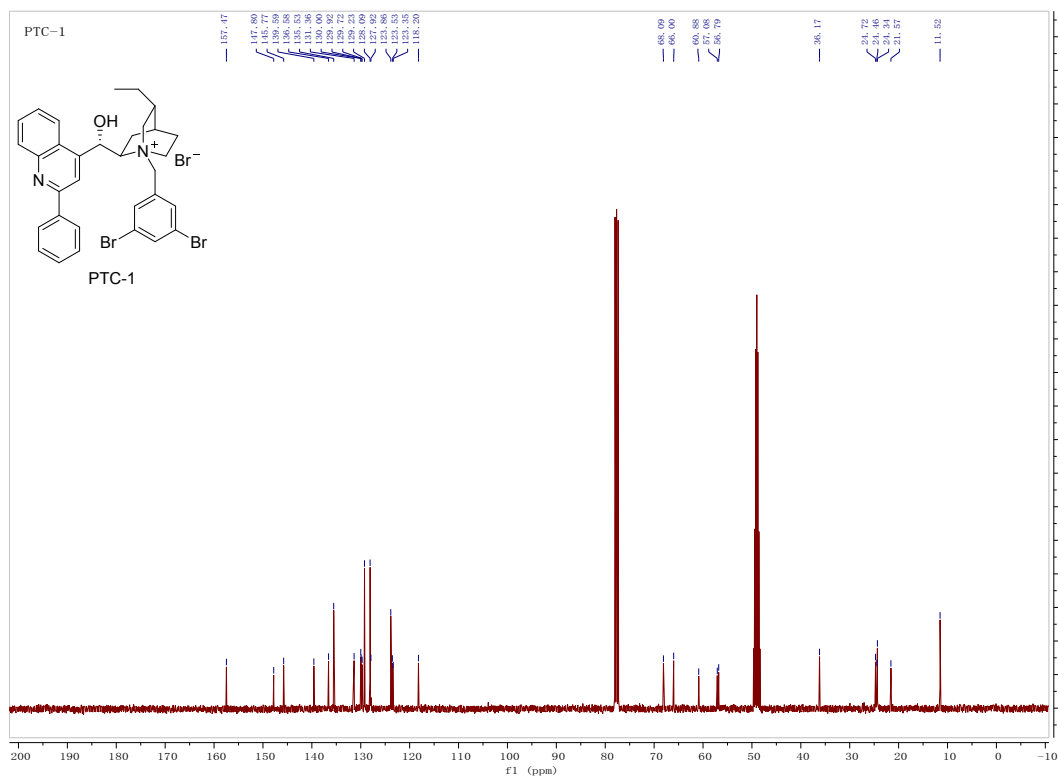



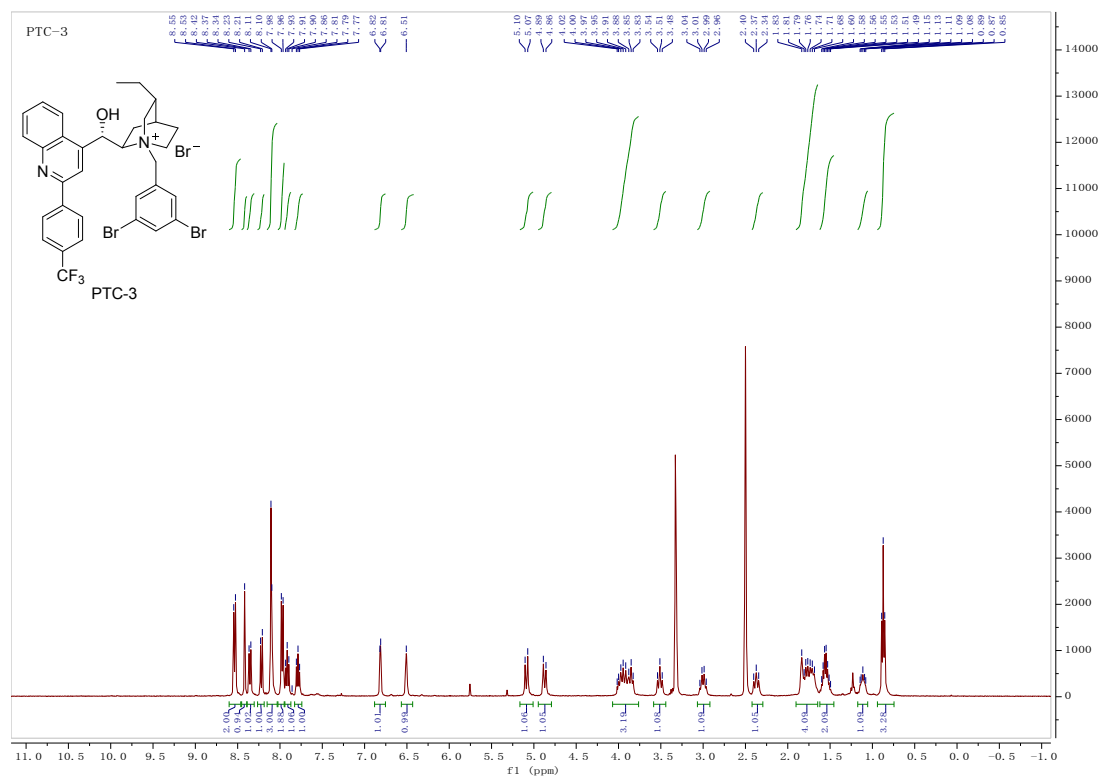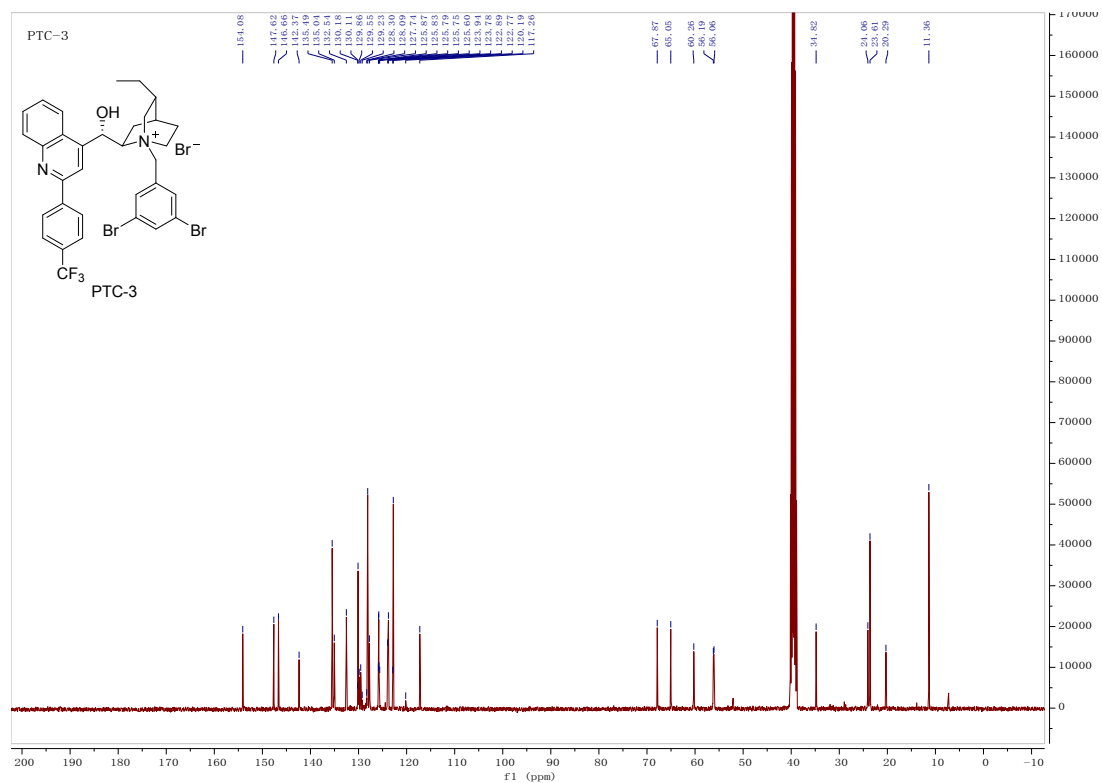





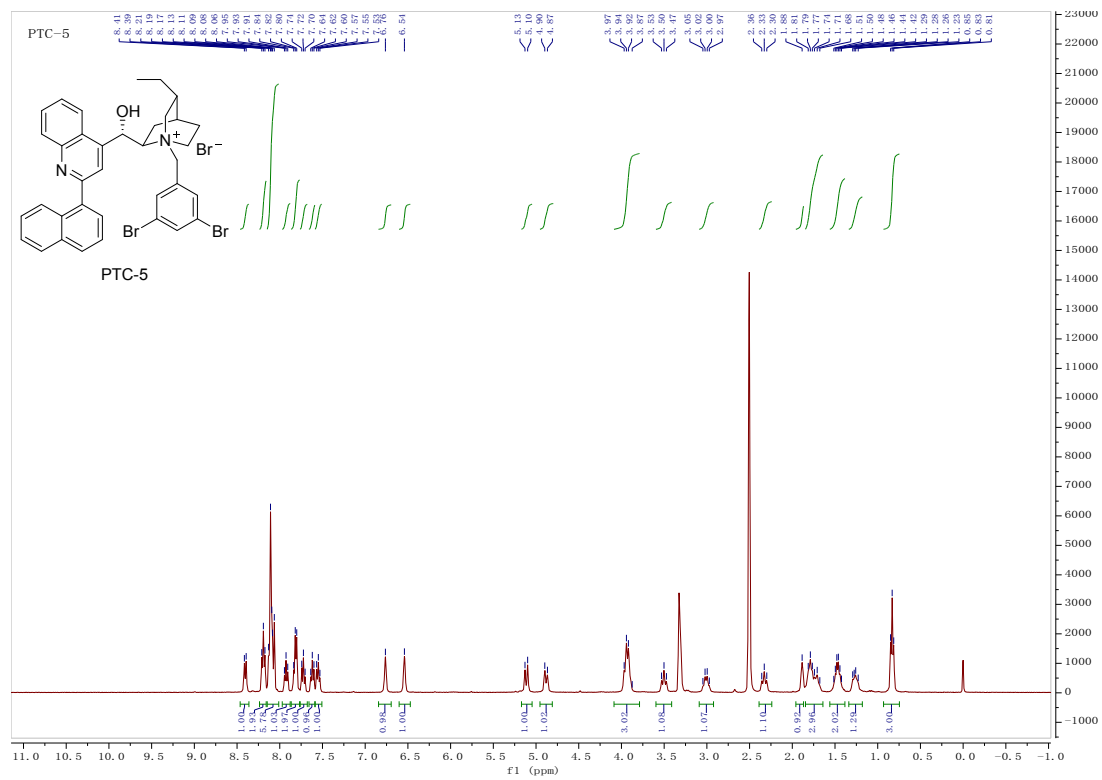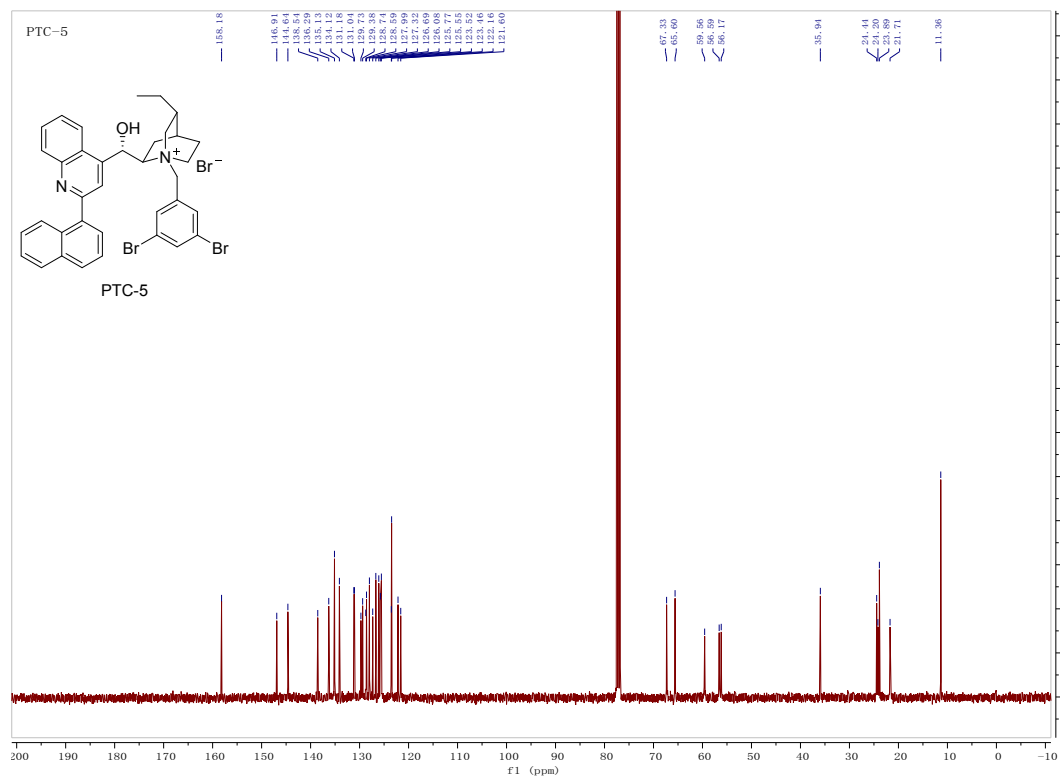

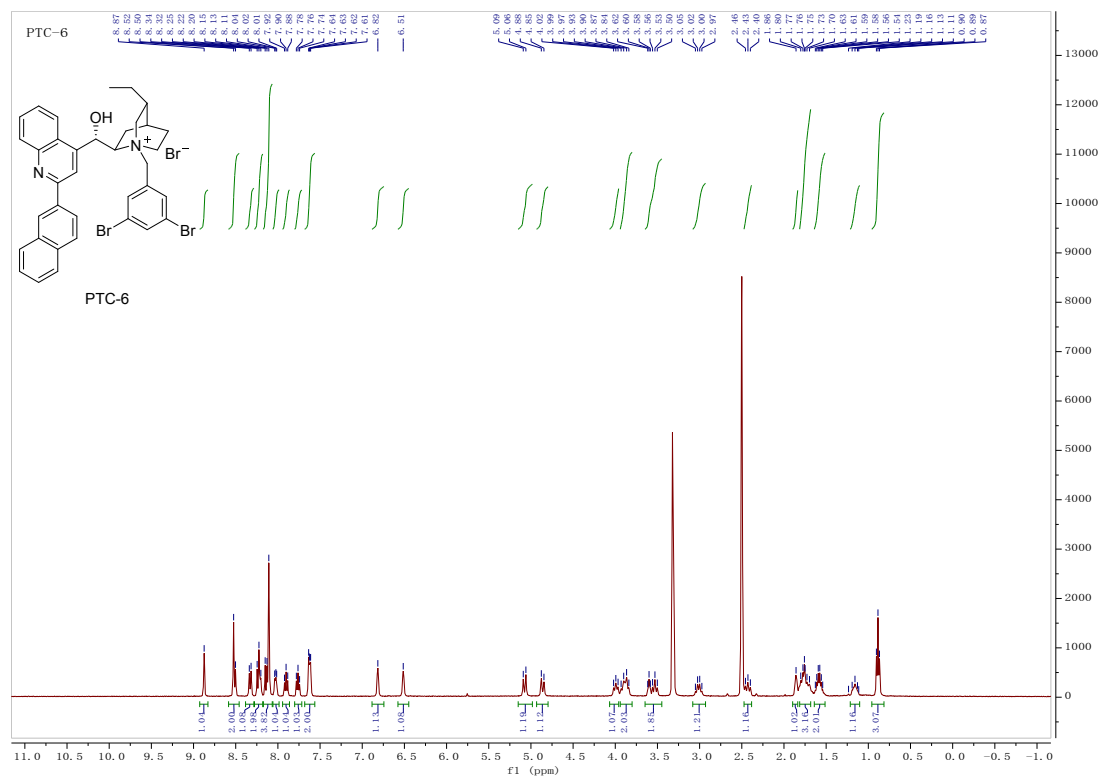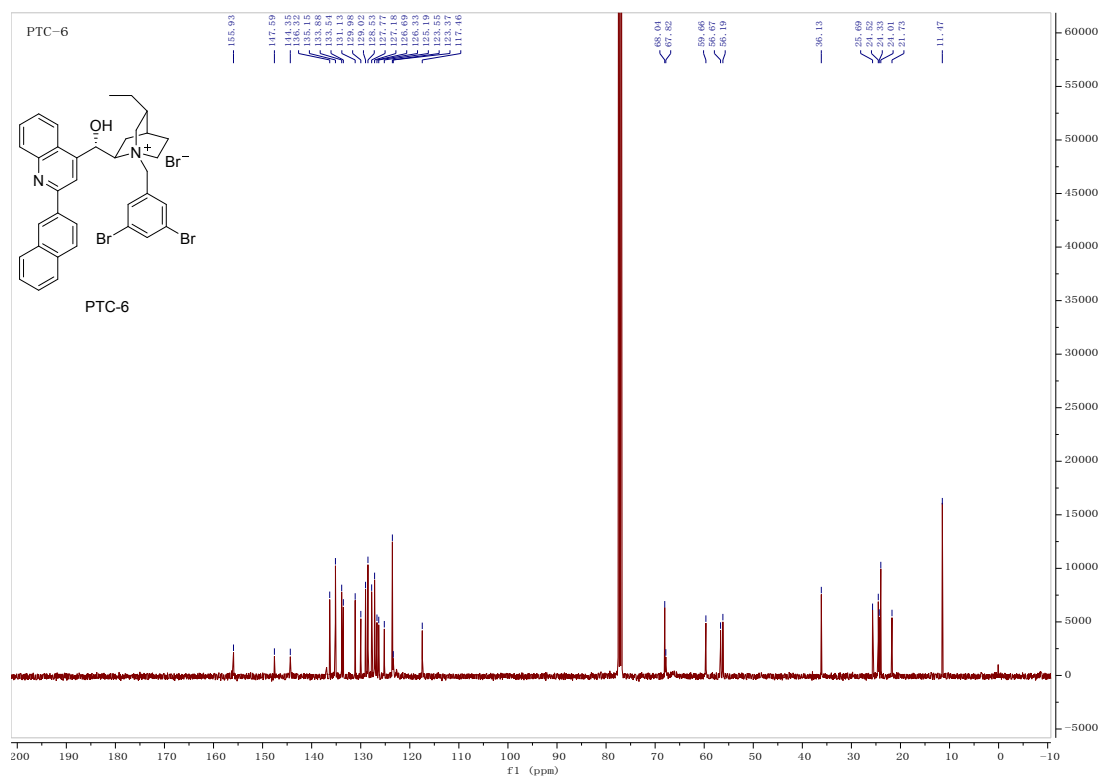



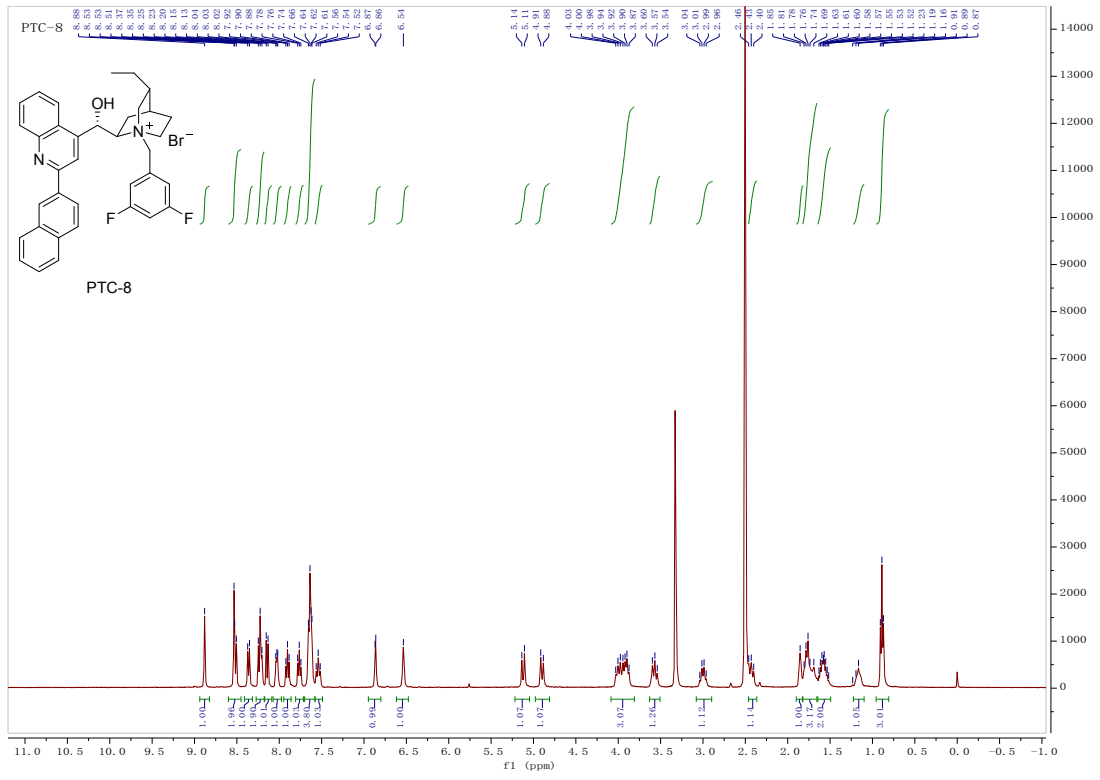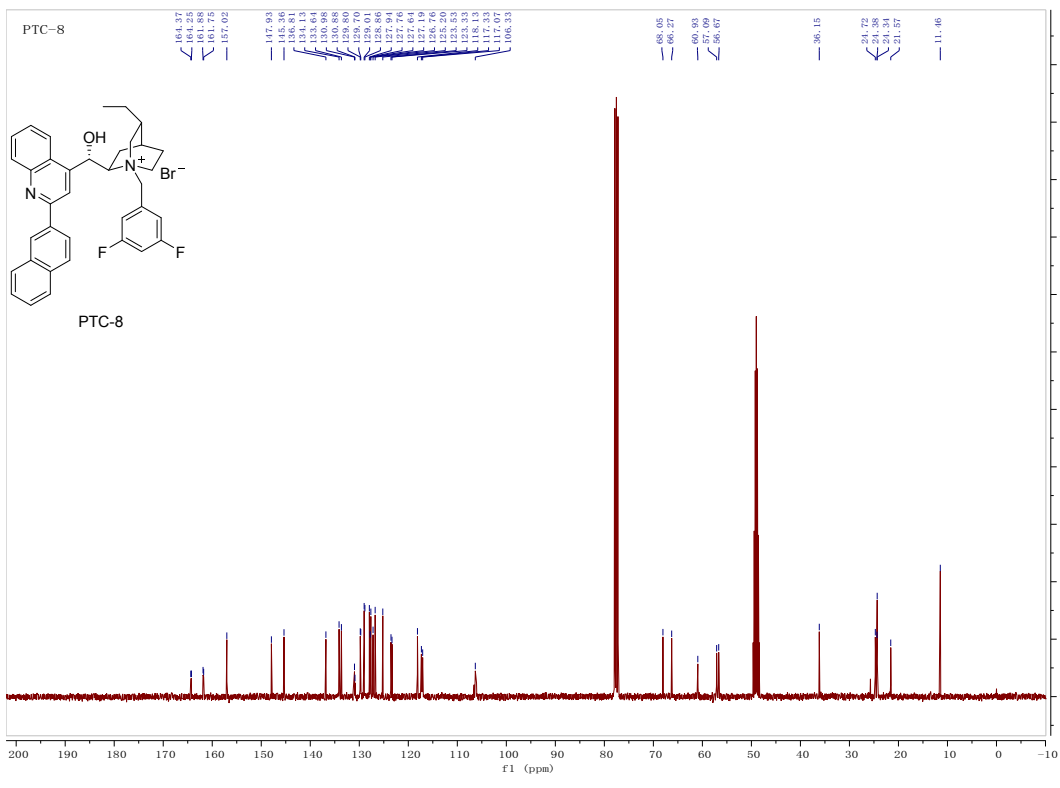

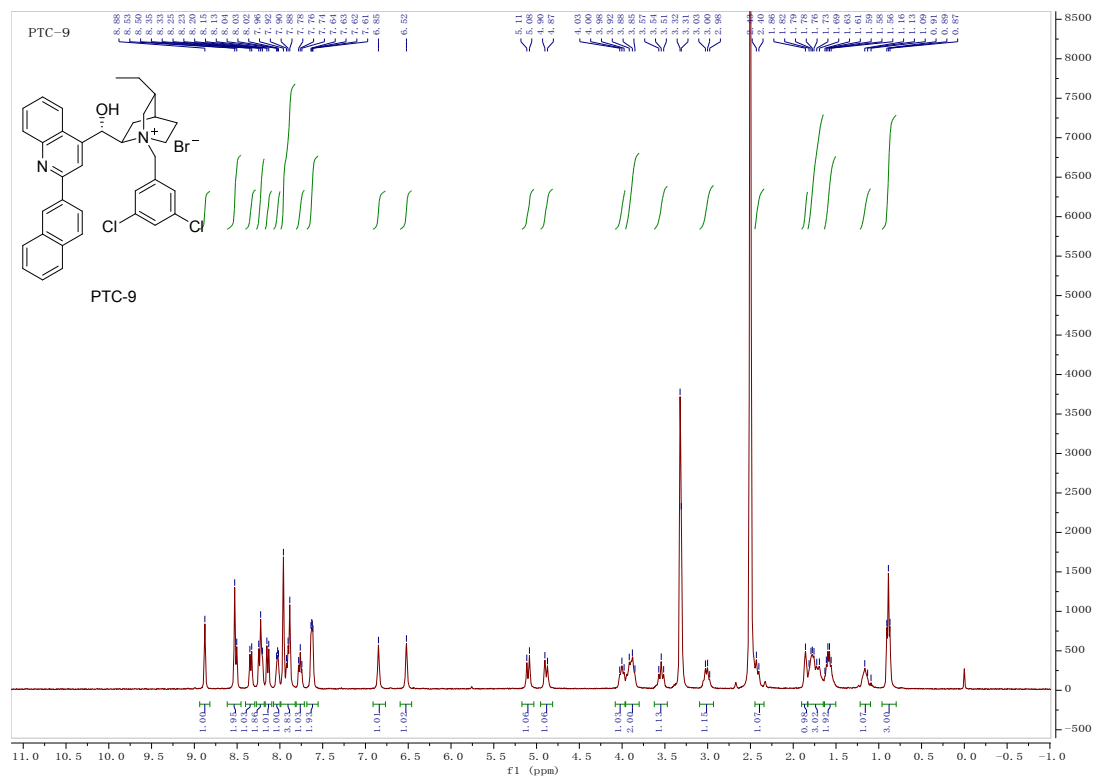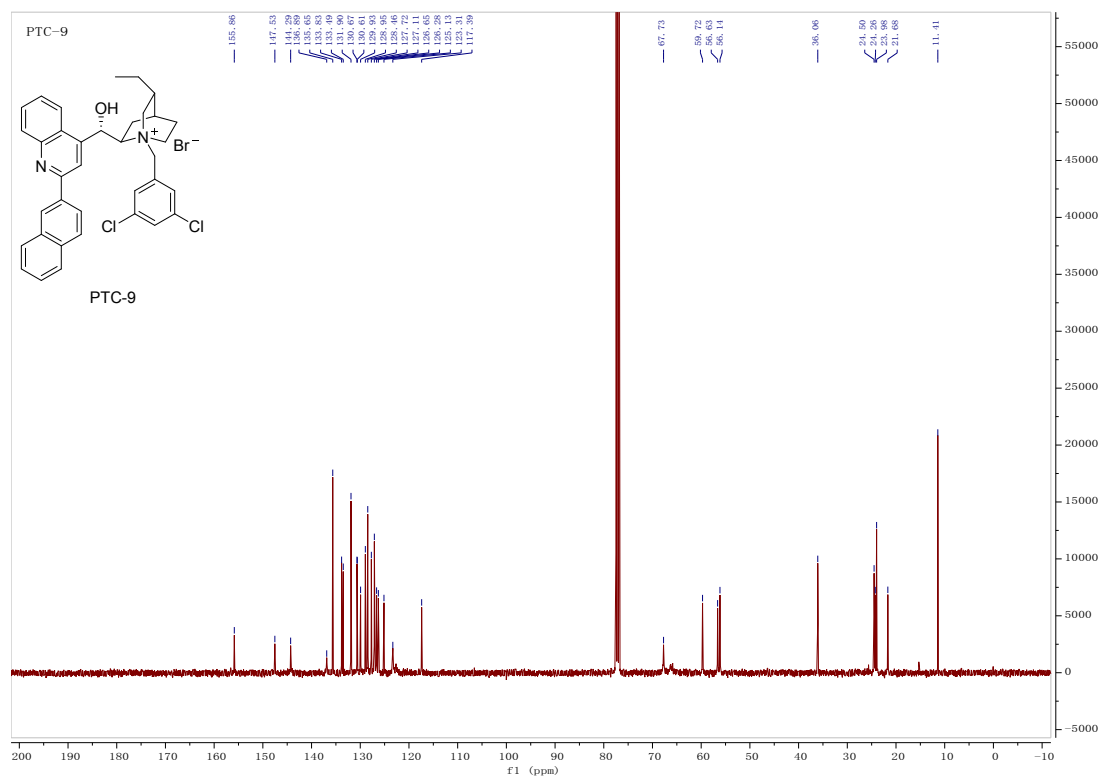

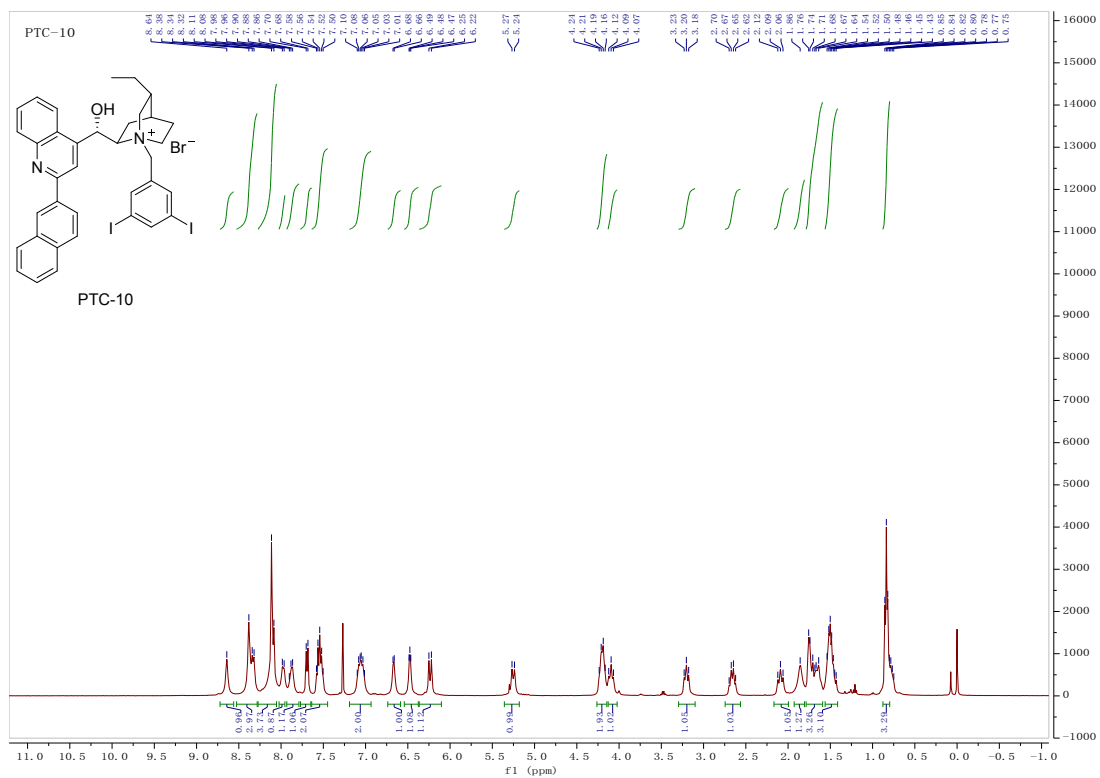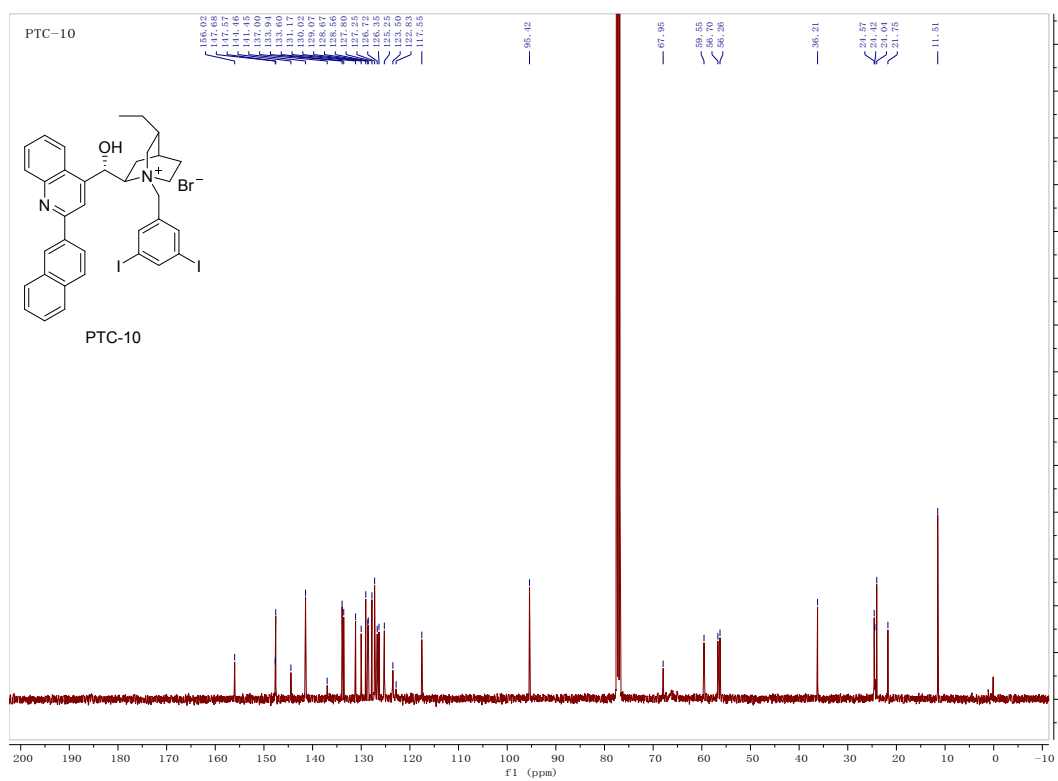

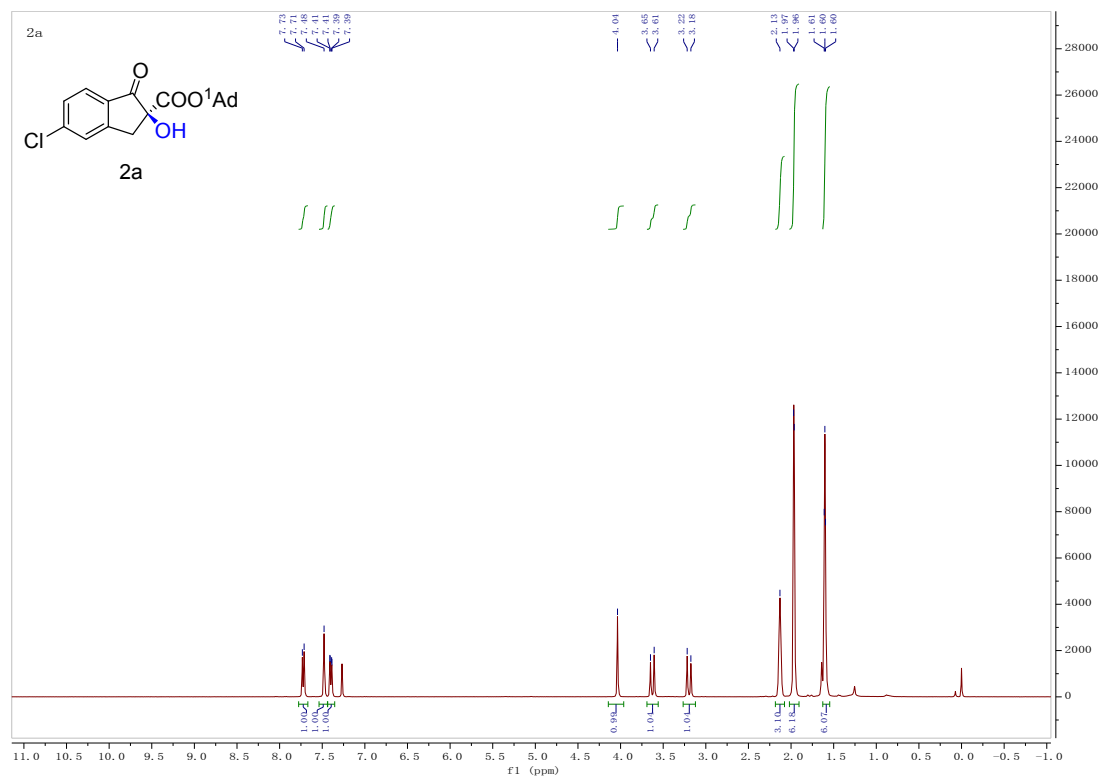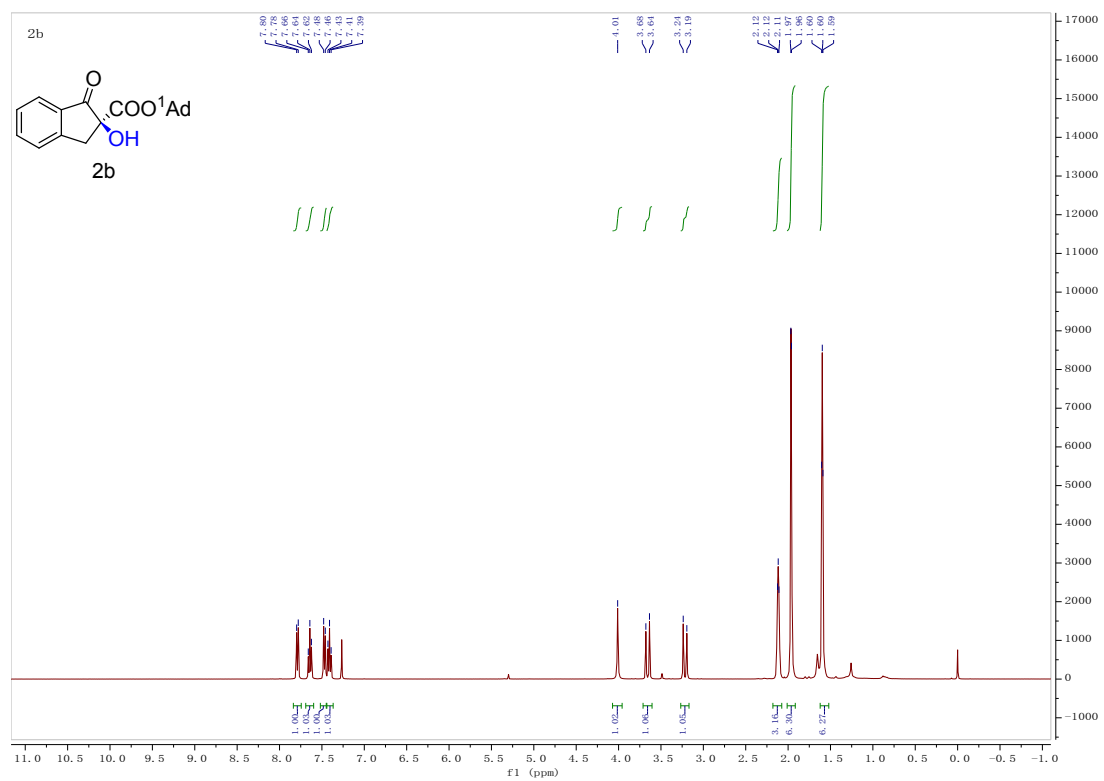

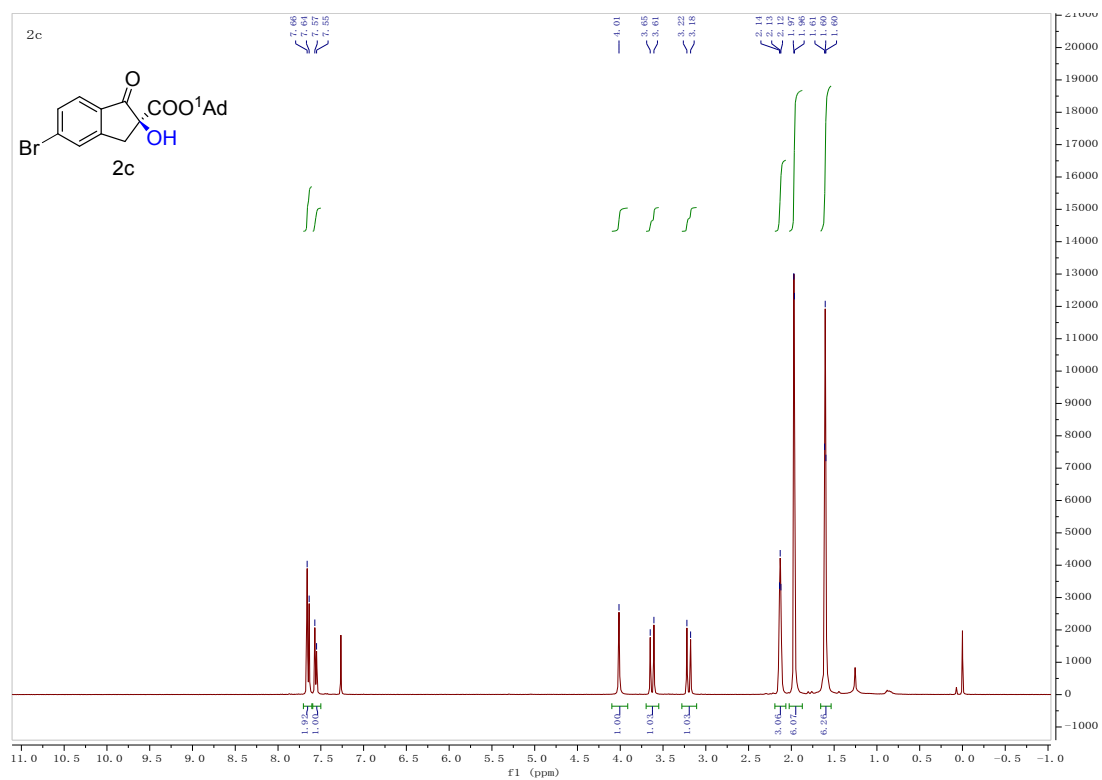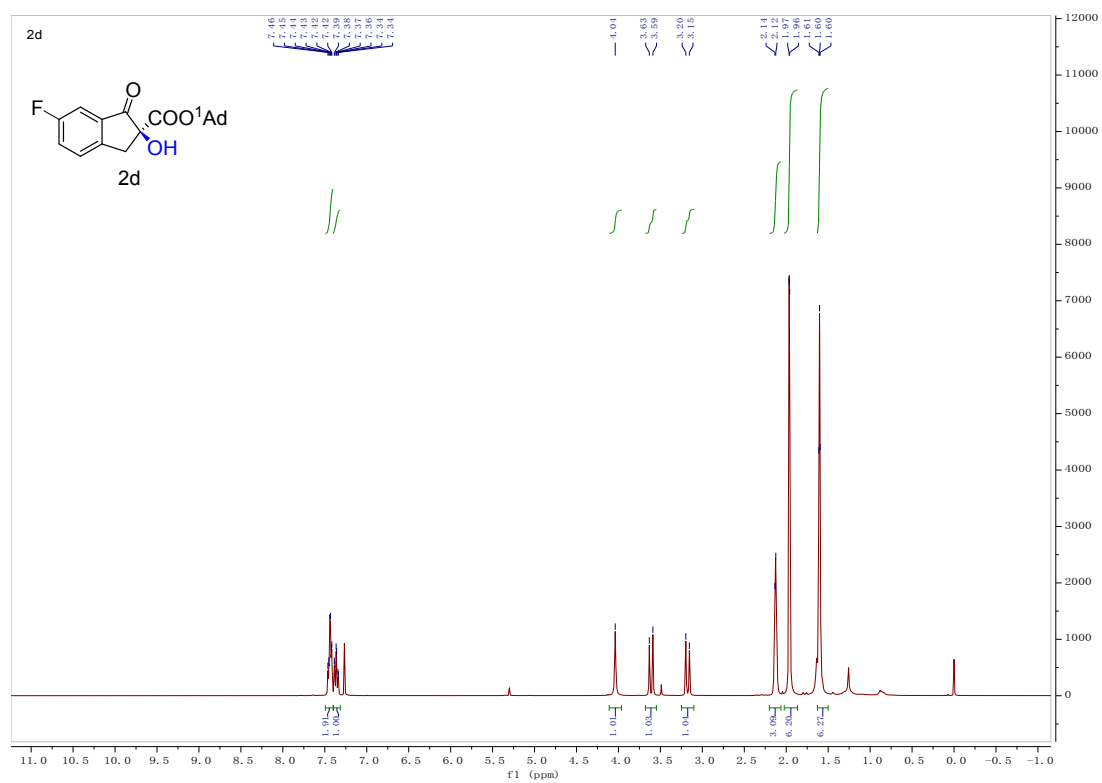



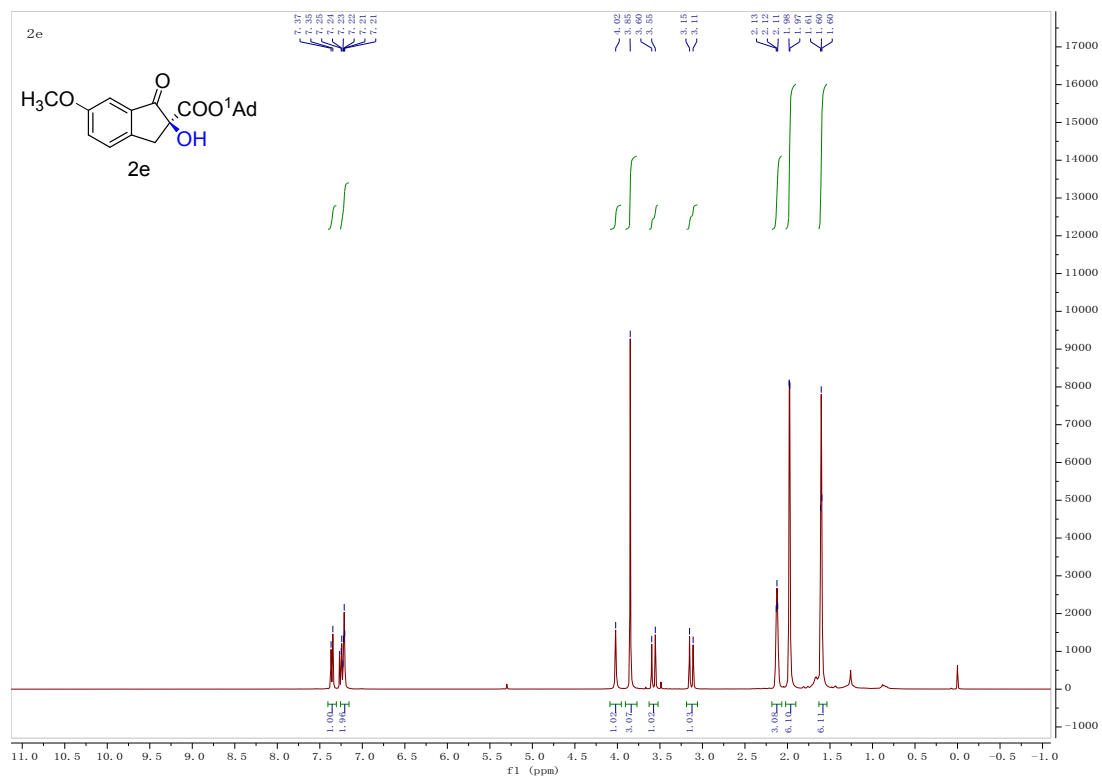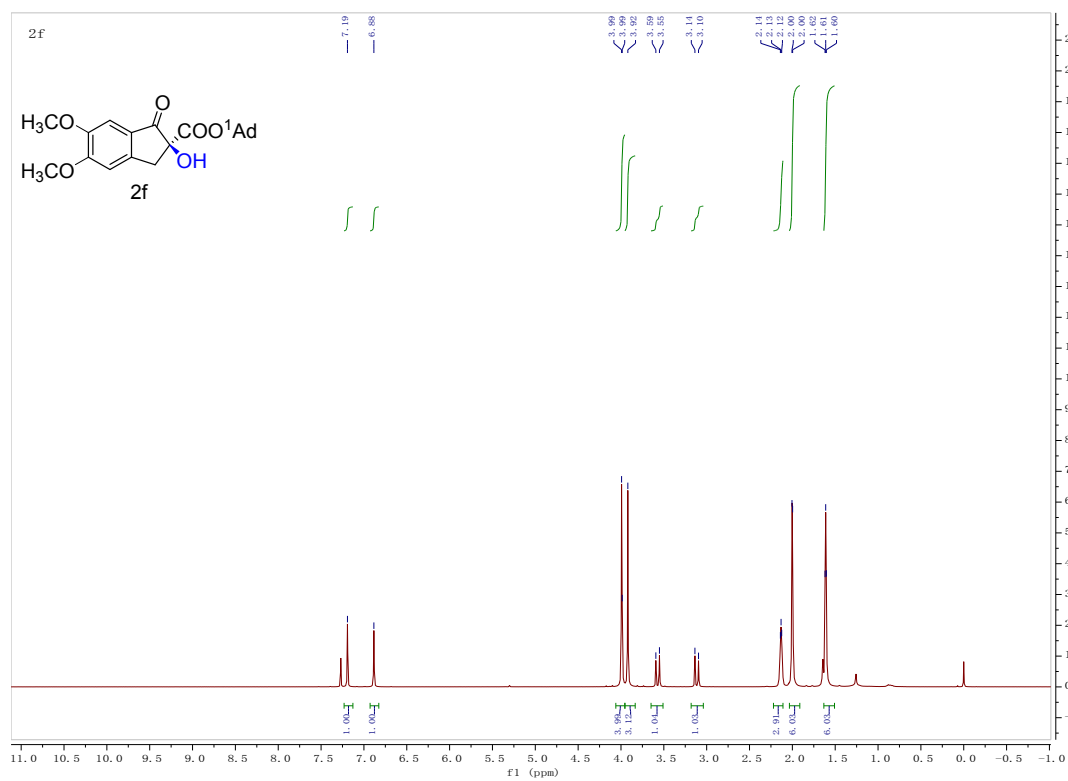

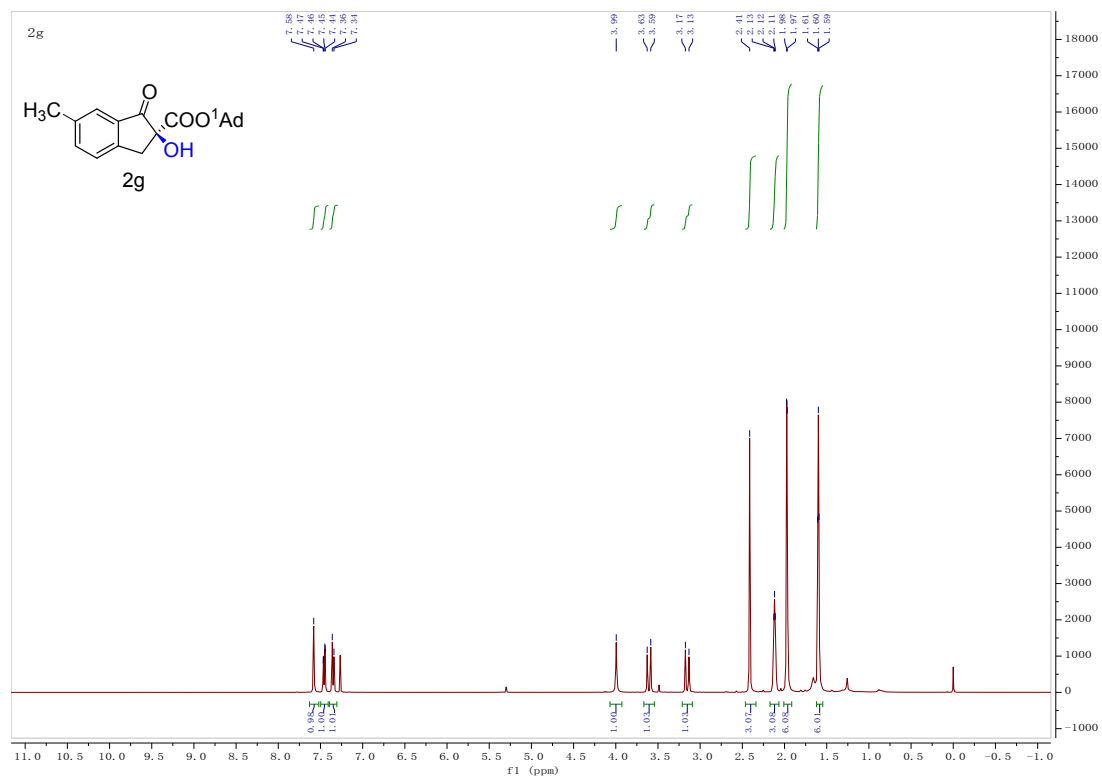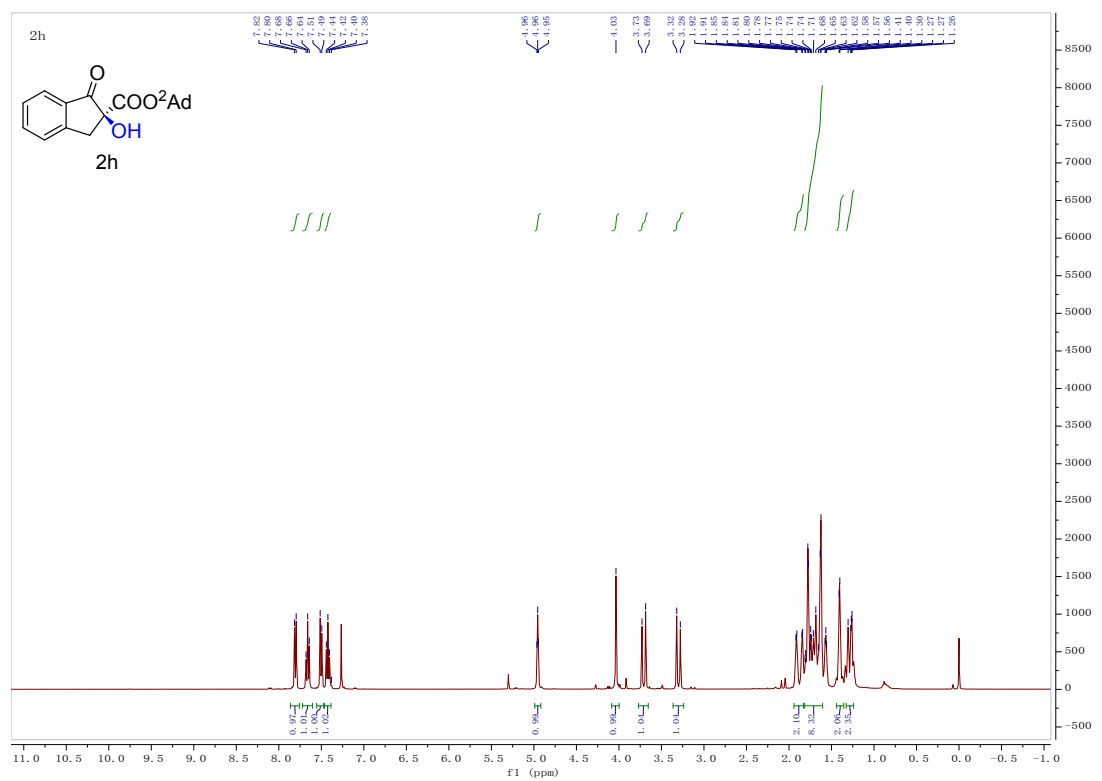

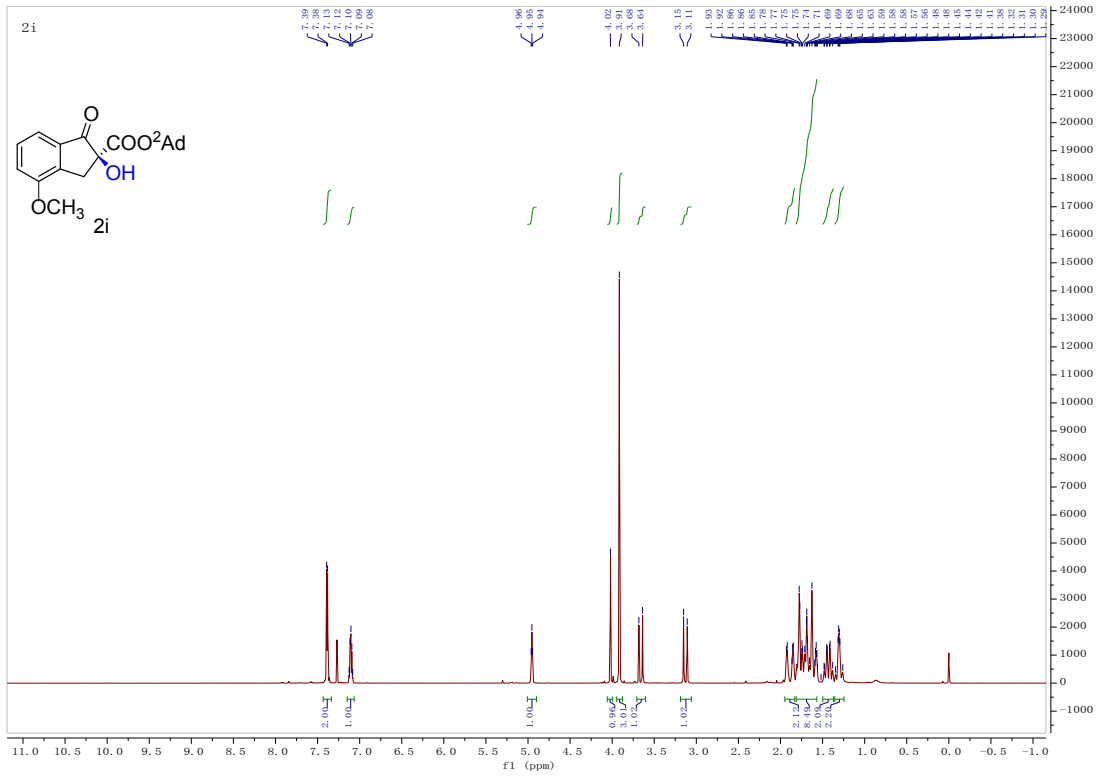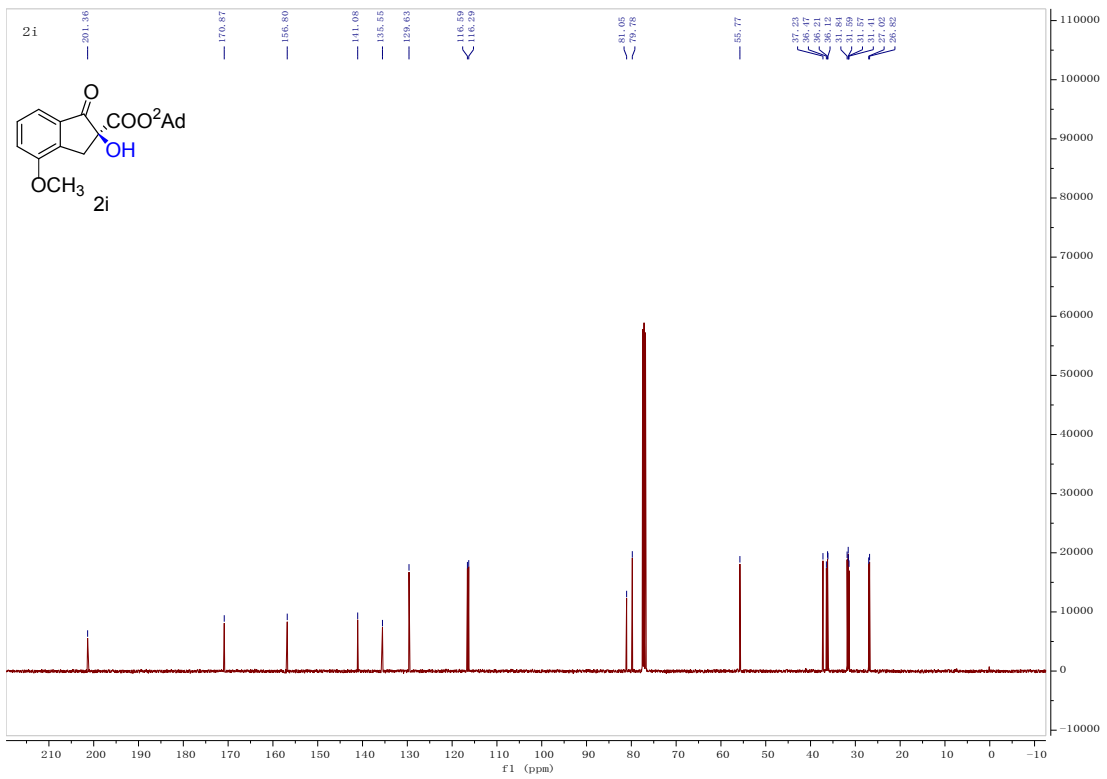

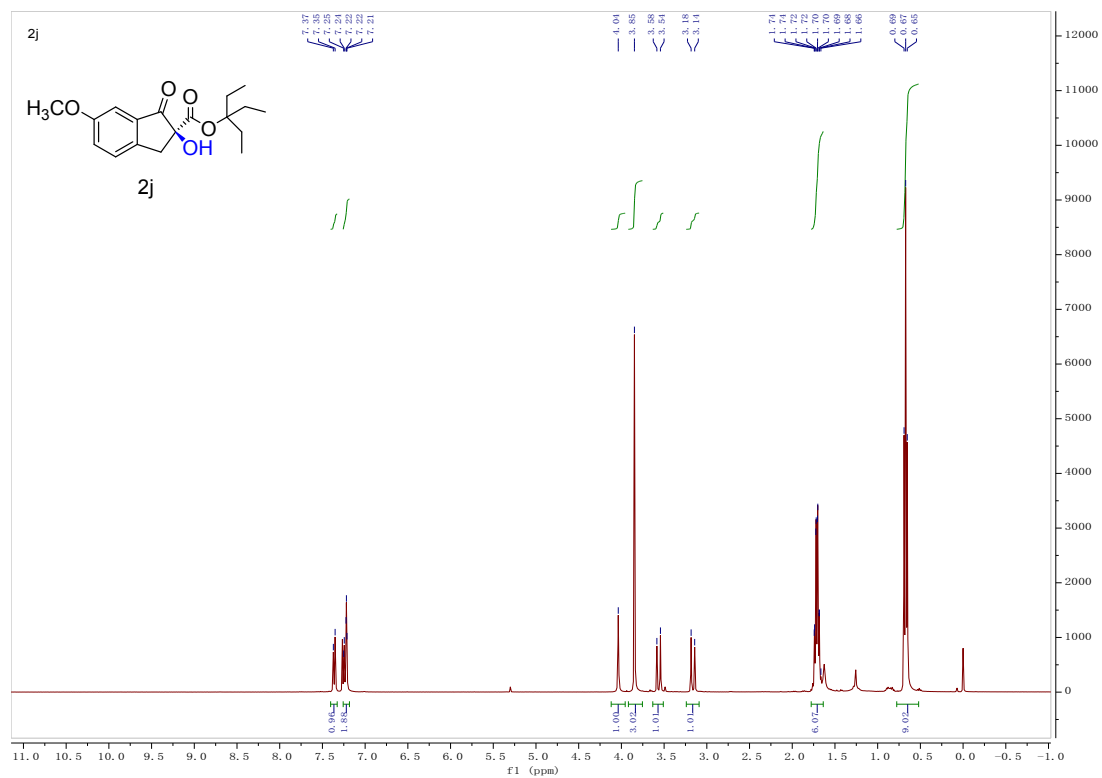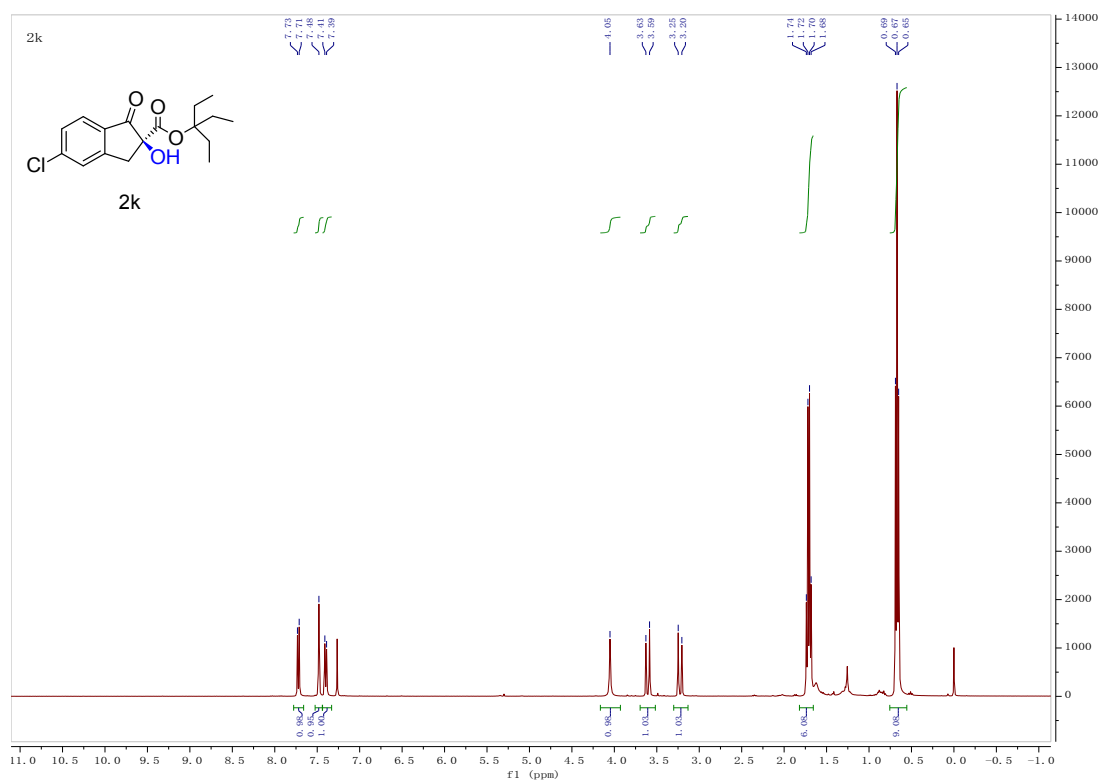

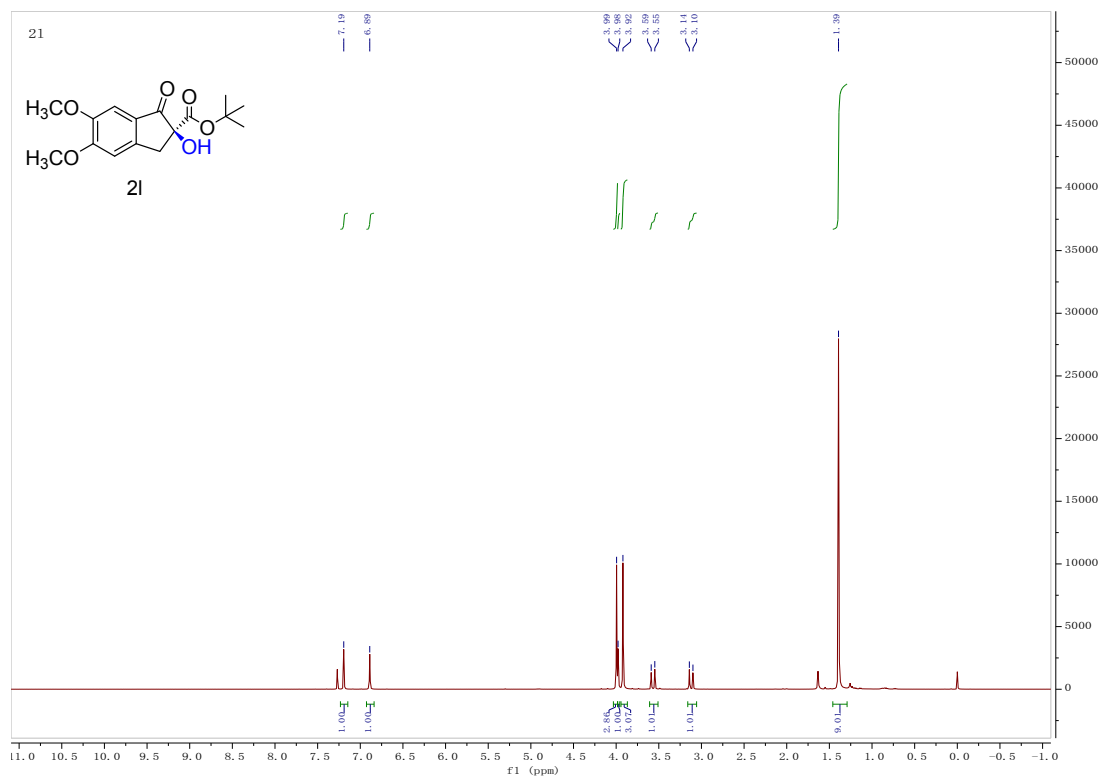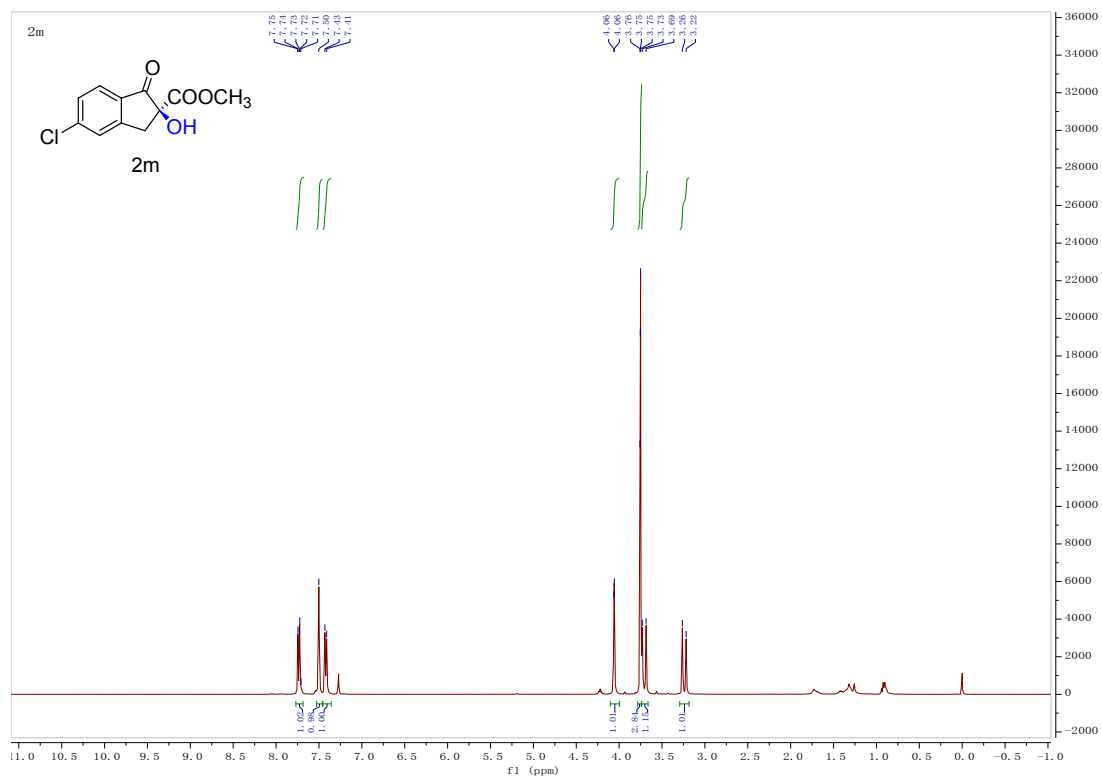

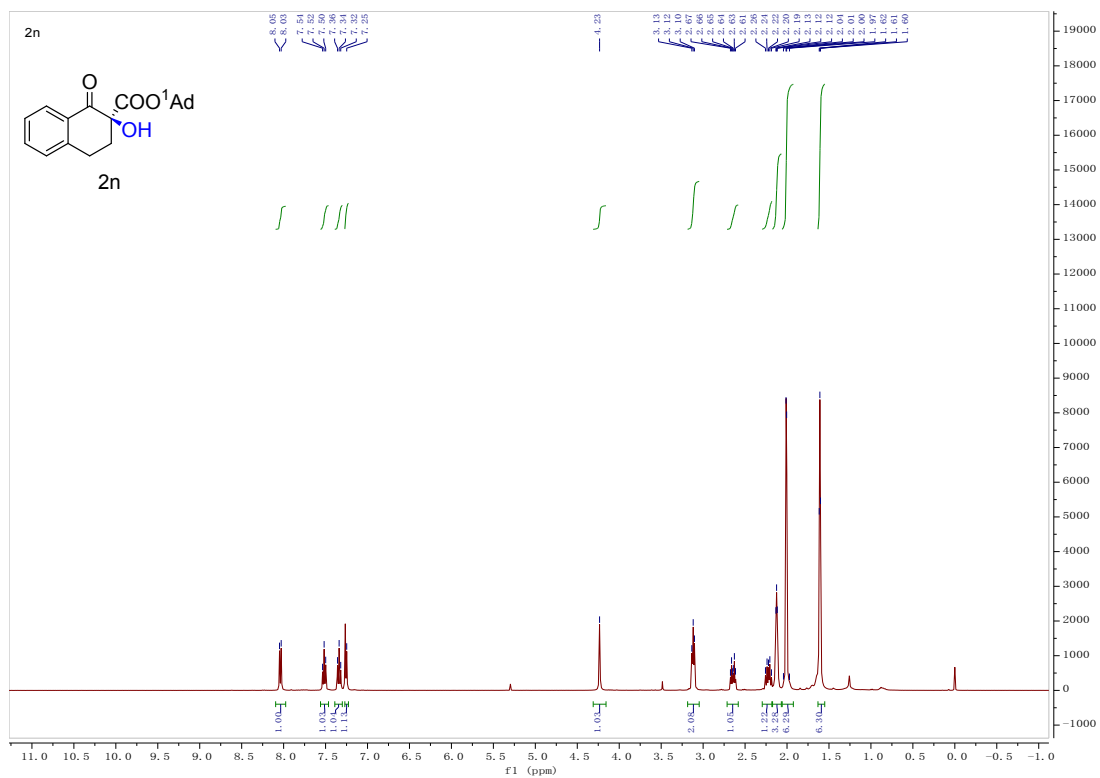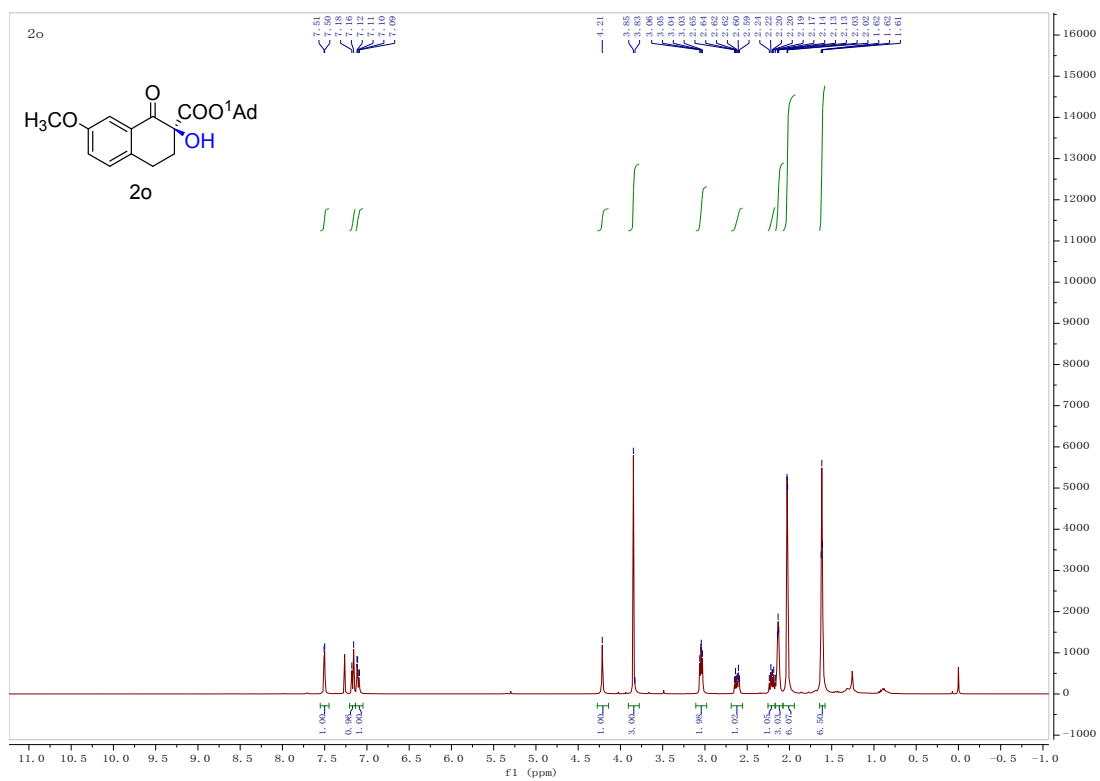

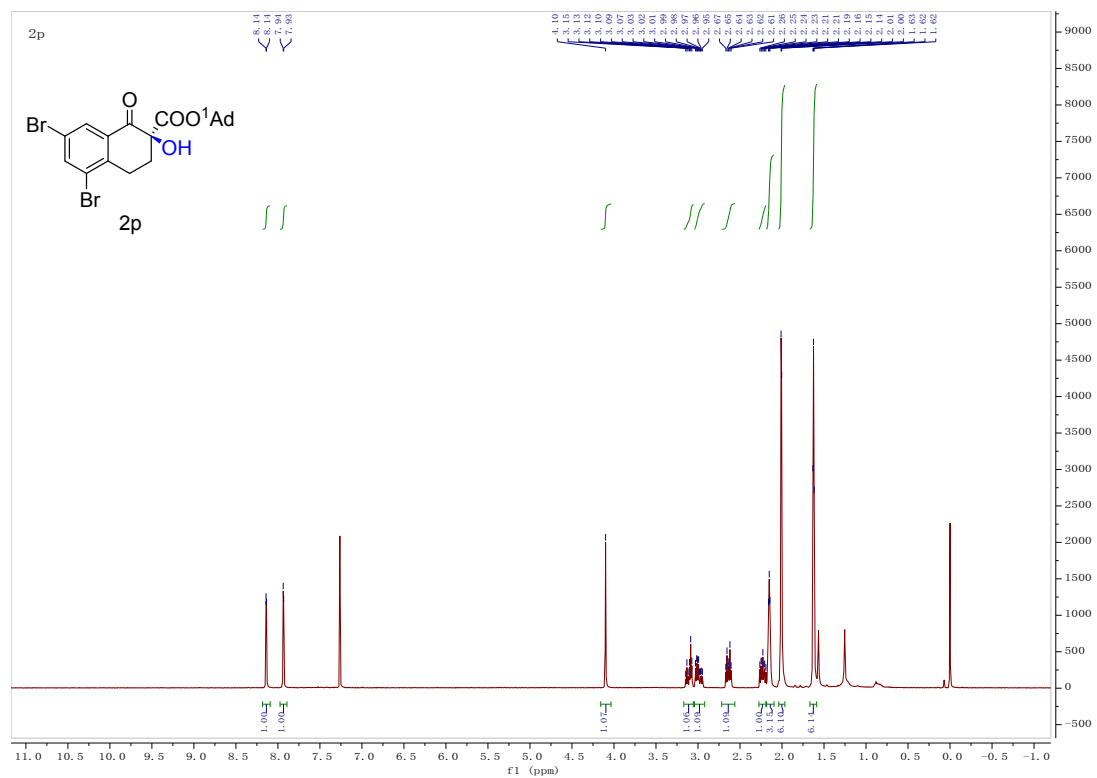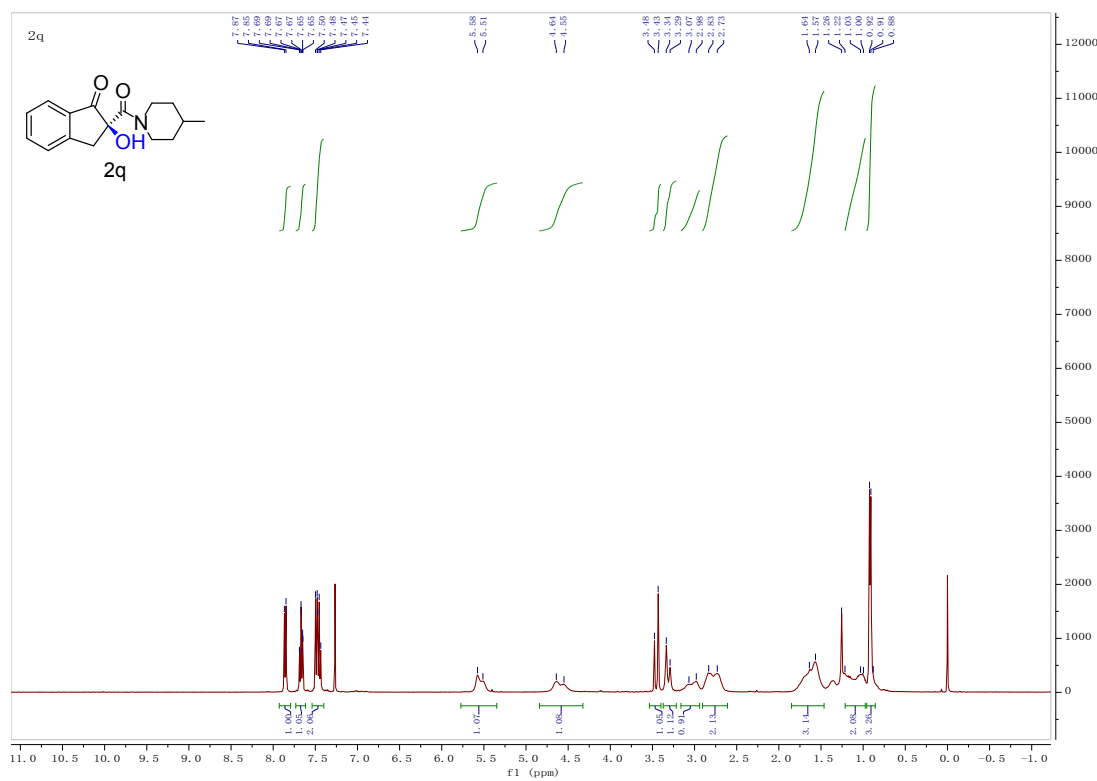

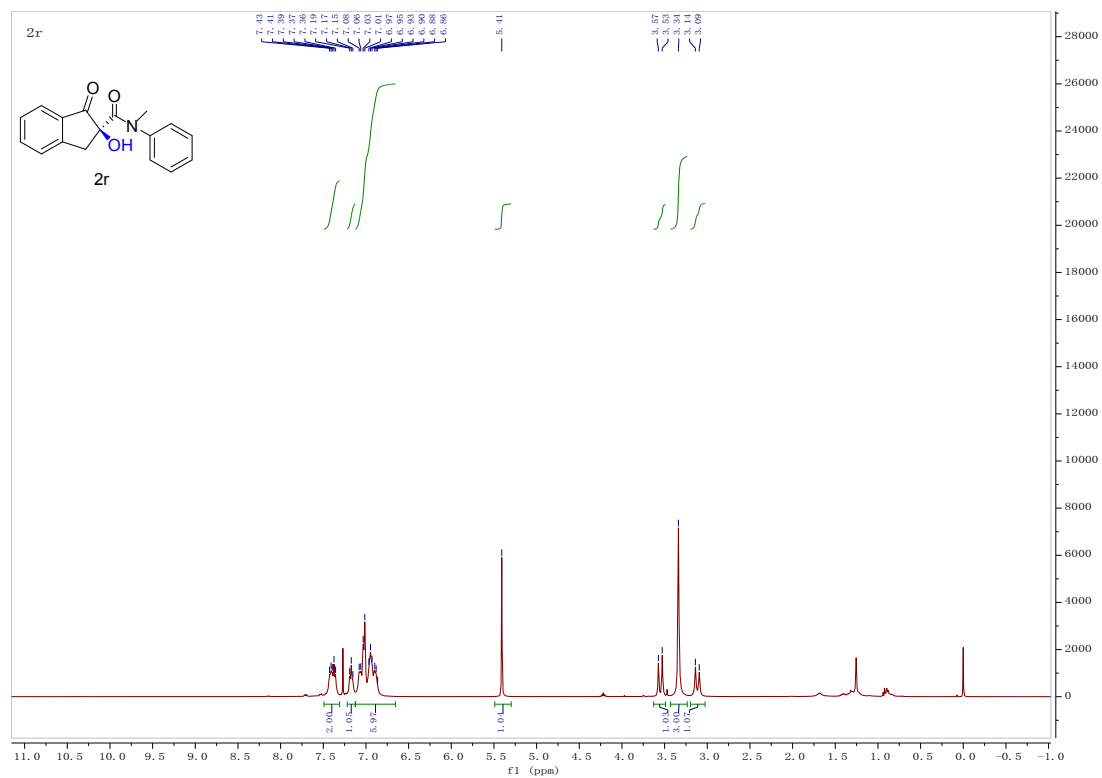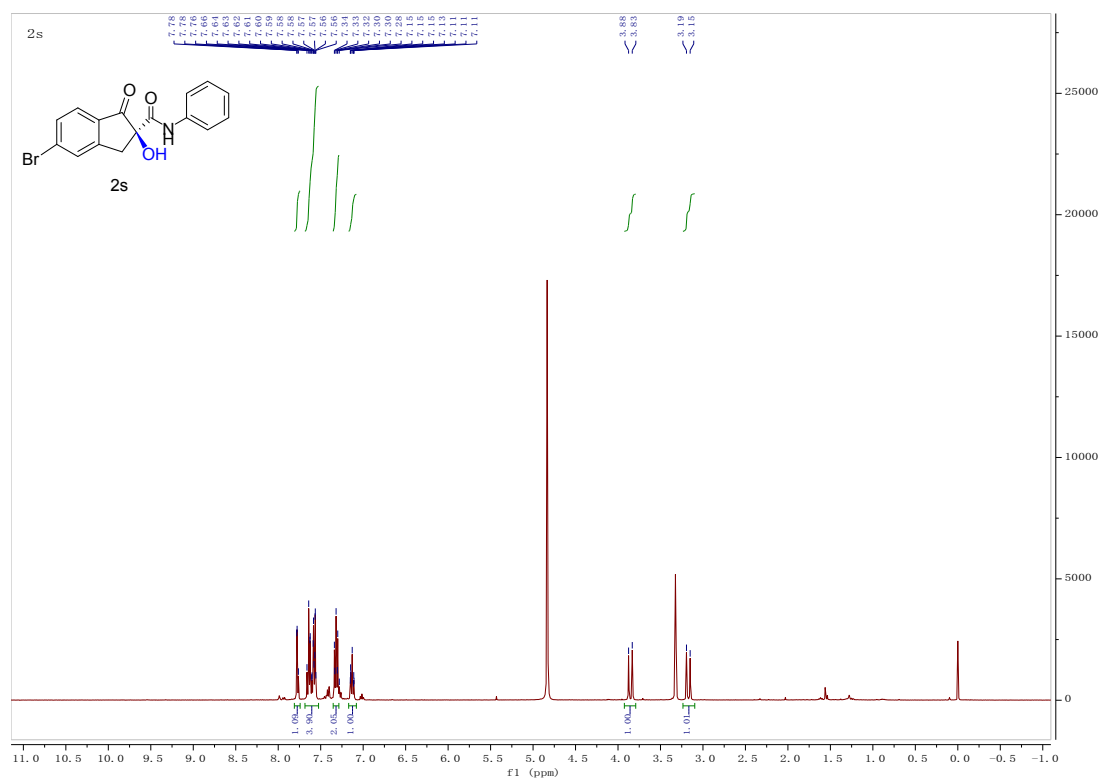





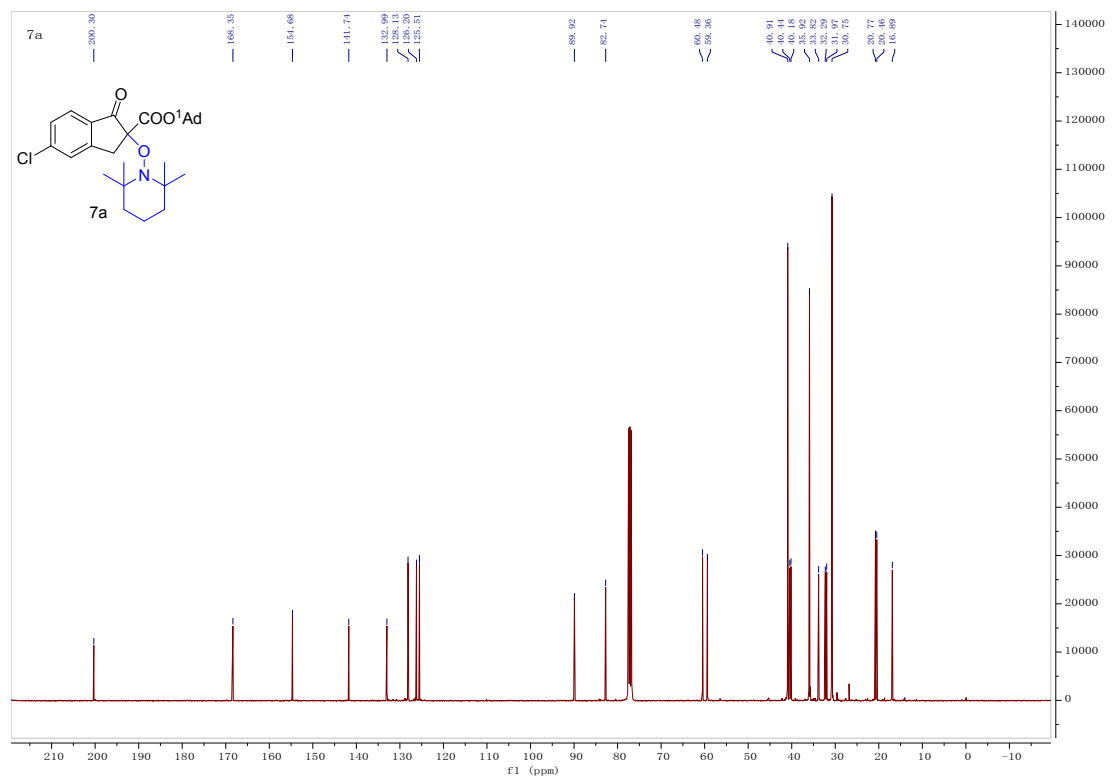

## 7. Copies of HPLC Spectra

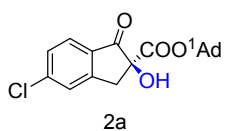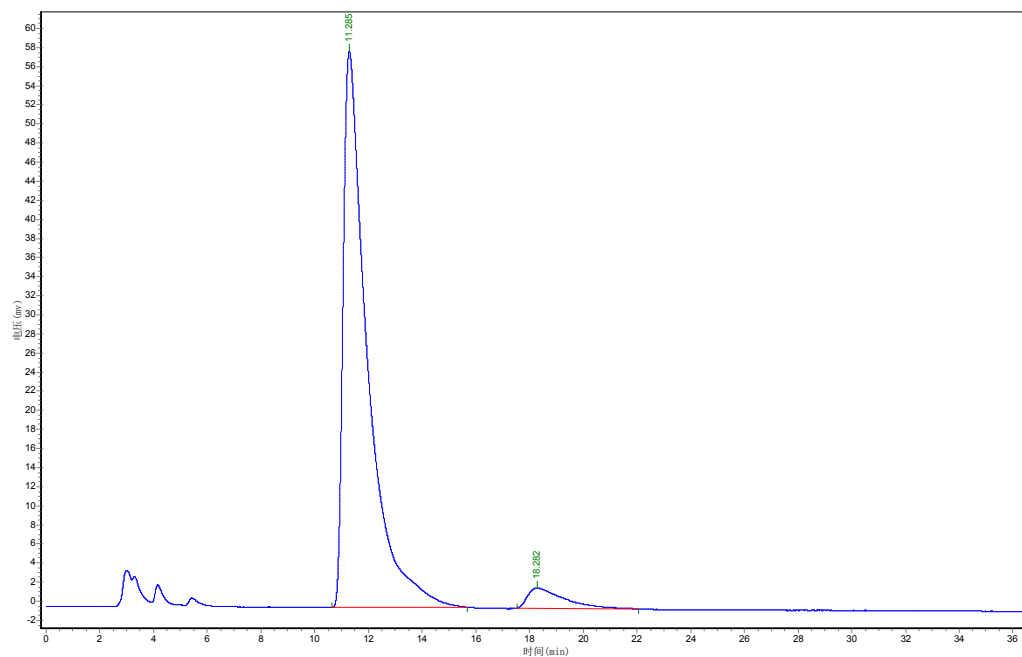

| Peak | RetTime | Height    | Area        | Area%   |
|------|---------|-----------|-------------|---------|
| 1    | 11.285  | 58275.480 | 3642204.000 | 94.8479 |
| 2    | 18.282  | 2110.641  | 197843.141  | 5.1521  |

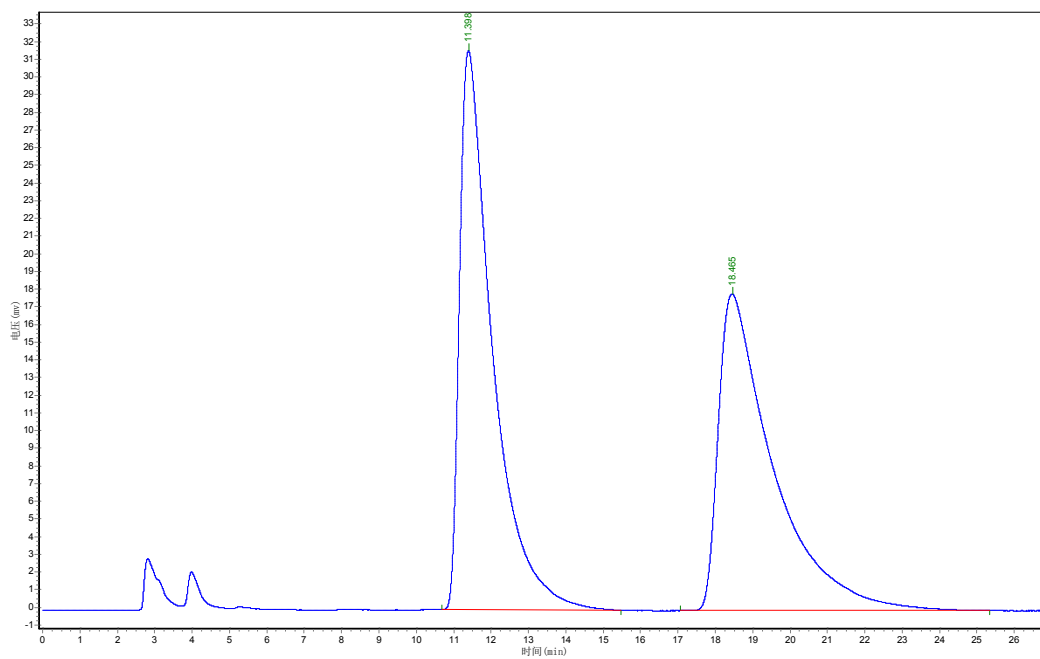

| Peak | RetTime | Height    | Area        | Area%   |
|------|---------|-----------|-------------|---------|
| 1    | 11.398  | 31641.277 | 1943232.000 | 51.7408 |
| 2    | 18.465  | 17906.307 | 1812471.625 | 48.2592 |

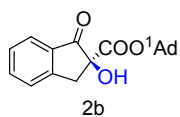

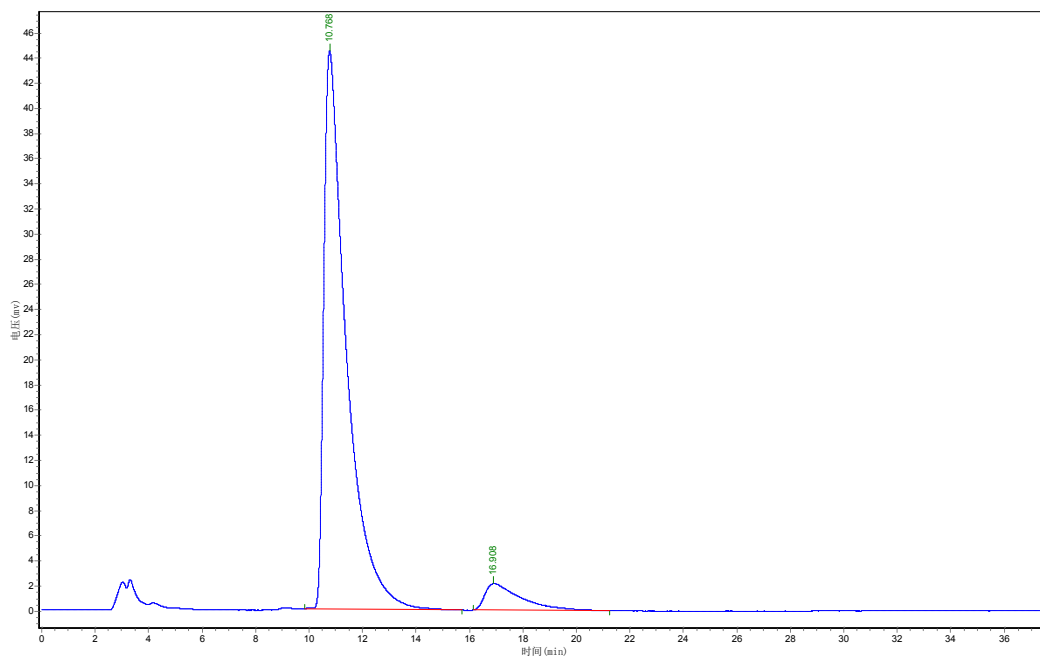

| Peak | RetTime | Height    | Area        | Area%   |
|------|---------|-----------|-------------|---------|
| 1    | 10.768  | 44397.836 | 2595911.750 | 92.9923 |
| 2    | 16.908  | 2113.575  | 195621.594  | 7.0077  |

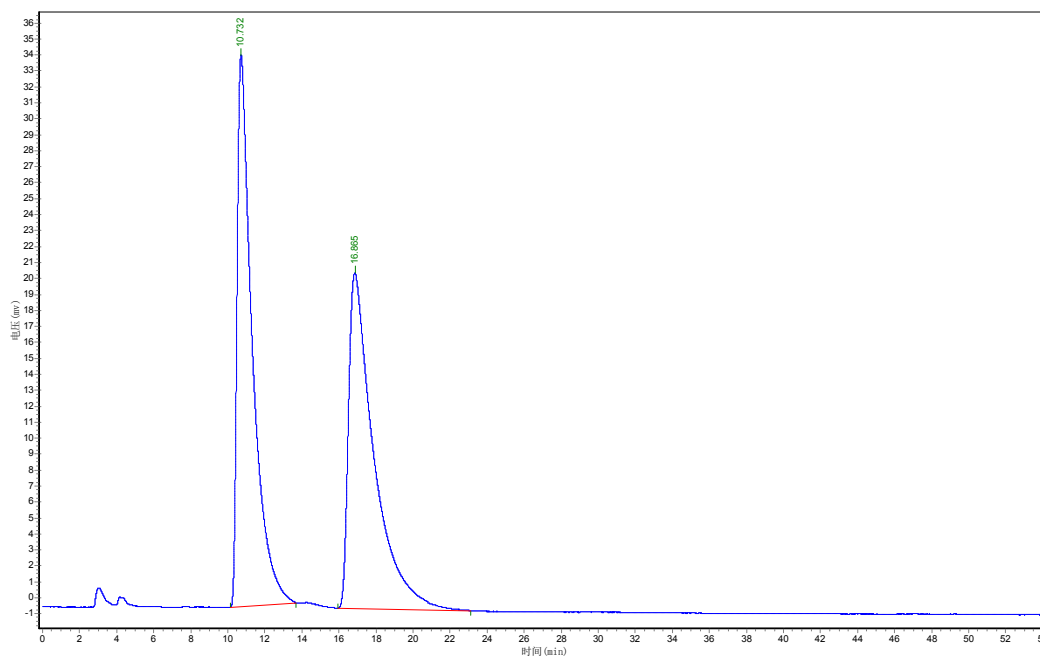

| Peak | RetTime | Height    | Area        | Area%   |
|------|---------|-----------|-------------|---------|
| 1    | 10.732  | 34526.410 | 1980273.250 | 49.8493 |
| 2    | 16.865  | 21005.838 | 1992247.750 | 50.1507 |

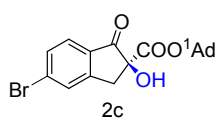

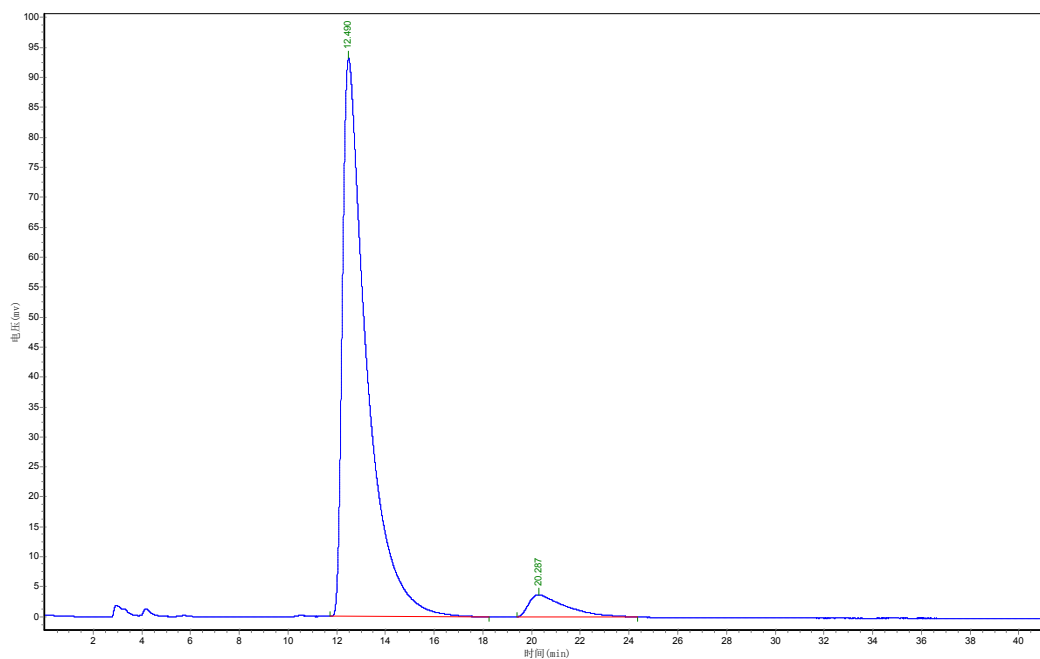

| Peak | RetTime | Height    | Area        | Area%   |
|------|---------|-----------|-------------|---------|
| 1    | 12.490  | 93177.172 | 6397412.500 | 94.2895 |
| 2    | 20.287  | 3700.715  | 387450.188  | 5.7105  |

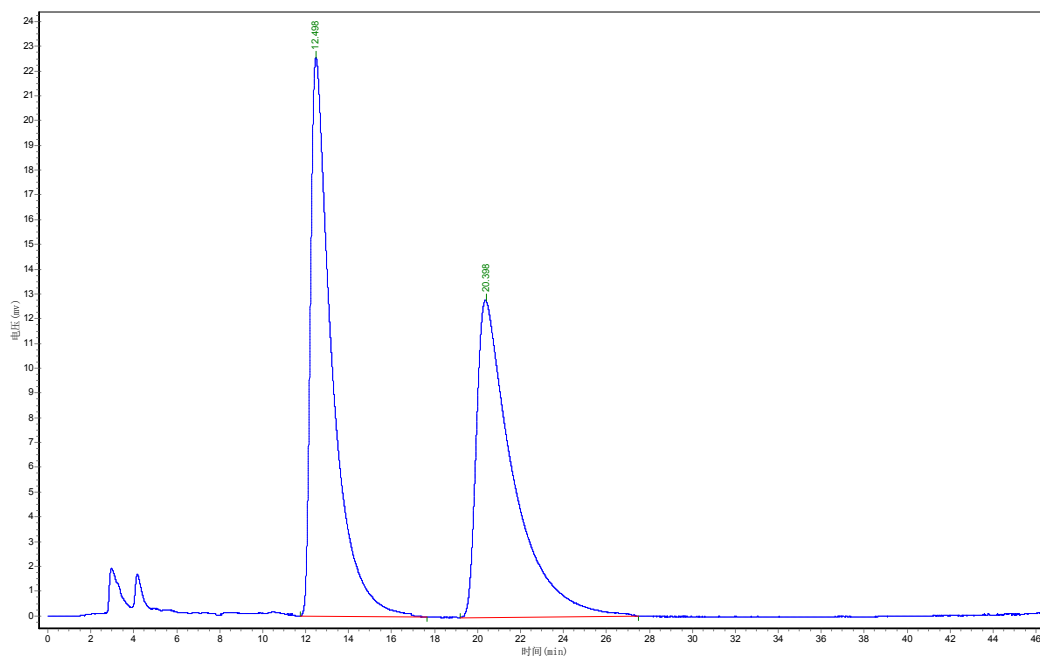

| Peak | RetTime | Height    | Area        | Area%   |
|------|---------|-----------|-------------|---------|
| 1    | 12.498  | 22548.375 | 1565998.250 | 51.0996 |
| 2    | 20.398  | 12801.829 | 1498601.375 | 48.9004 |

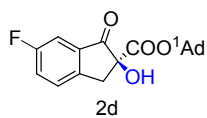

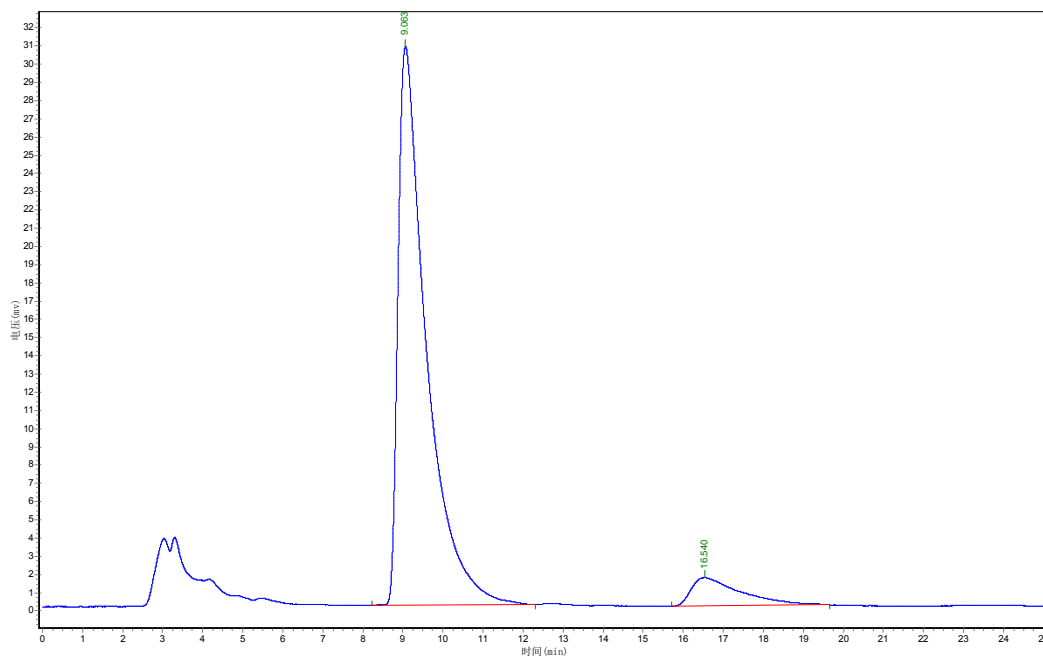

| Peak | RetTime | Height    | Area        | Area%   |
|------|---------|-----------|-------------|---------|
| 1    | 9.063   | 30639.209 | 1501242.875 | 91.8714 |
| 2    | 16.540  | 1548.476  | 132827.188  | 8.1286  |

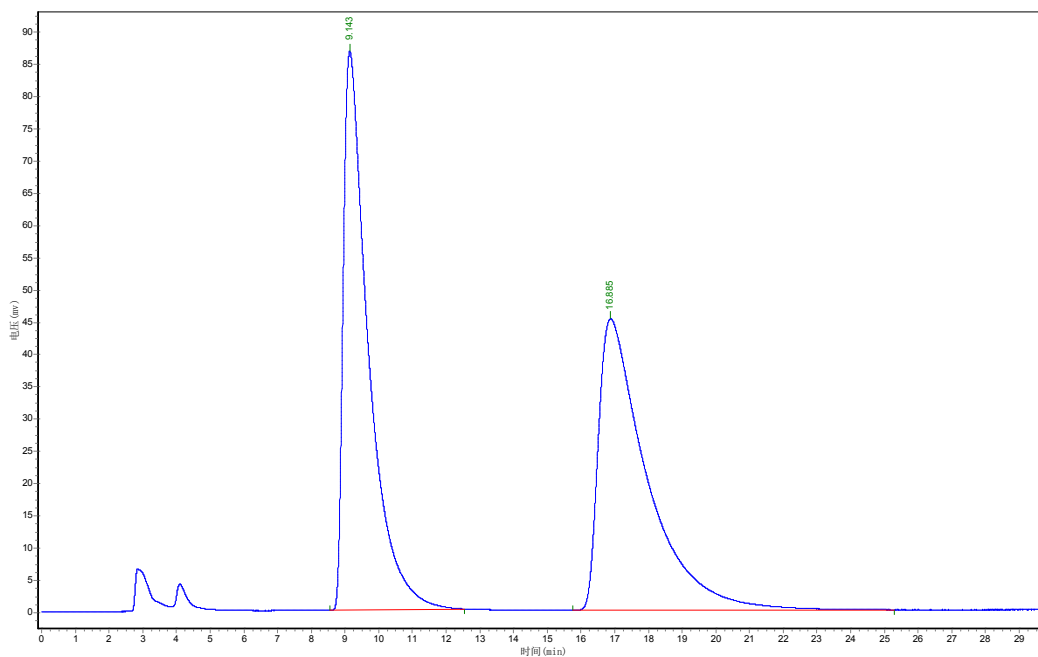

| Peak | RetTime | Height    | Area        | Area%   |
|------|---------|-----------|-------------|---------|
| 1    | 9.143   | 86719.742 | 4476201.000 | 49.8436 |
| 2    | 16.885  | 45202.719 | 4504300.500 | 50.1564 |

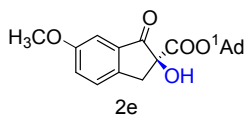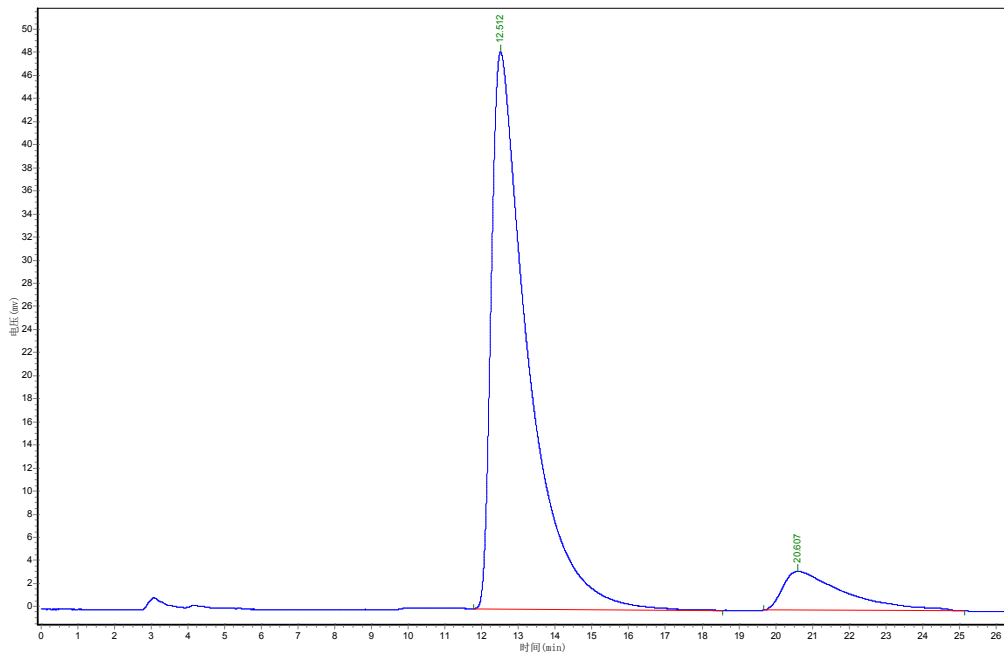

| Peak | RetTime | Height    | Area        | Area%   |
|------|---------|-----------|-------------|---------|
| 1    | 12.512  | 48260.758 | 3343454.250 | 89.4594 |
| 2    | 20.607  | 3378.211  | 393942.313  | 10.5406 |

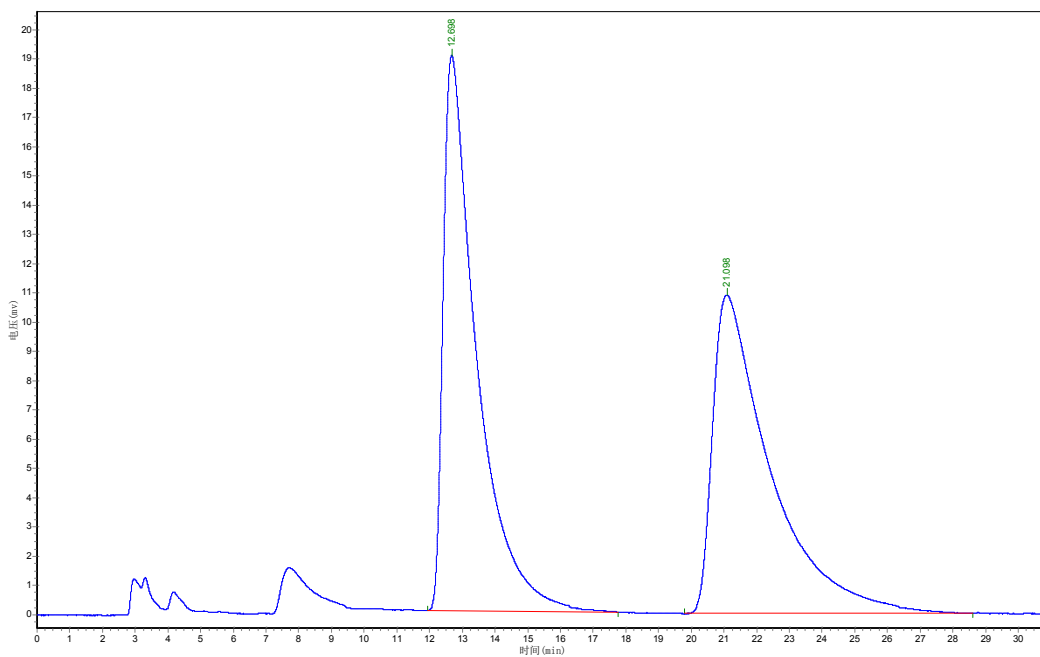

| Peak | RetTime | Height    | Area        | Area%   |
|------|---------|-----------|-------------|---------|
| 1    | 12.698  | 18983.652 | 1351248.875 | 50.3943 |
| 2    | 21.098  | 10890.447 | 1330101.000 | 49.6056 |

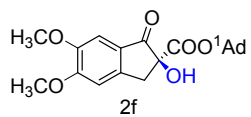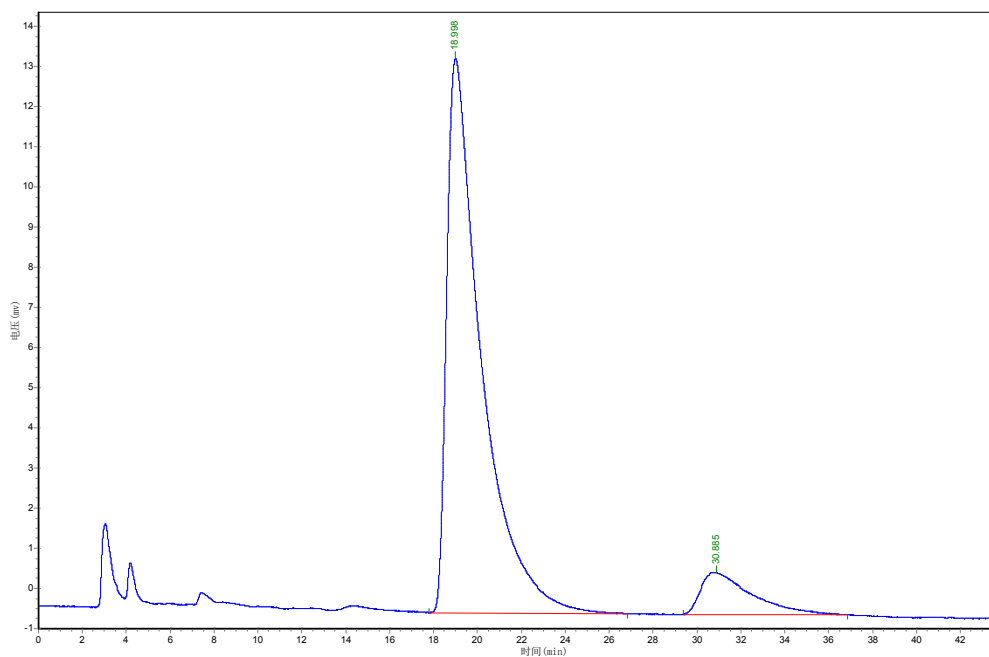

| Peak | RetTime | Height    | Area        | Area%   |
|------|---------|-----------|-------------|---------|
| 1    | 18.998  | 13812.267 | 1513618.250 | 90.0184 |
| 2    | 30.885  | 1046.821  | 167835.109  | 9.9816  |

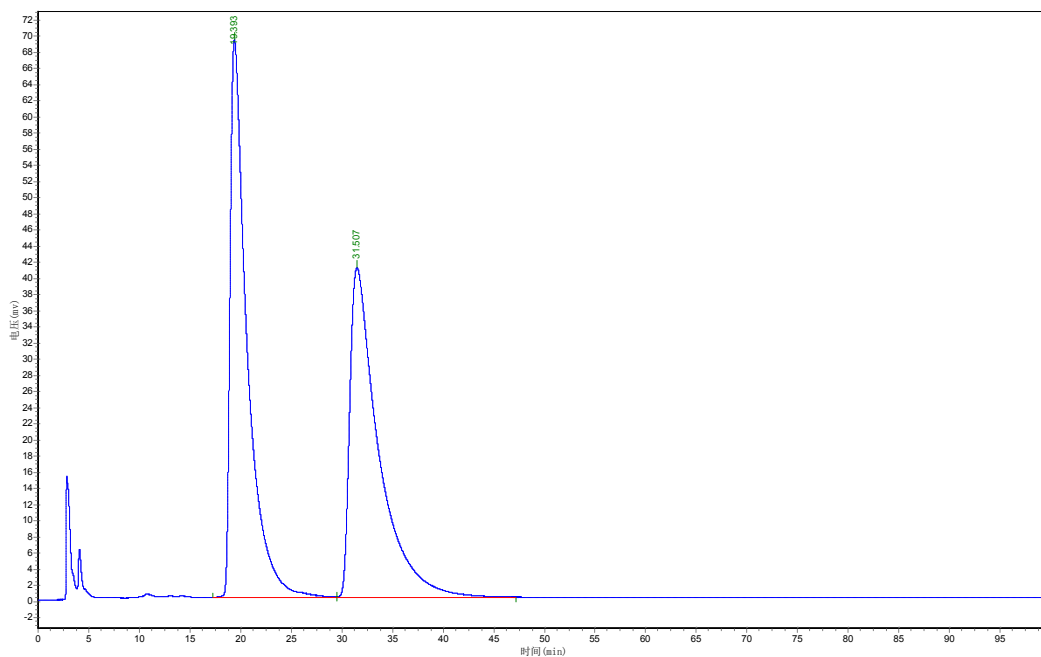

| Peak | RetTime | Height    | Area        | Area%   |
|------|---------|-----------|-------------|---------|
| 1    | 19.393  | 69034.383 | 8054553.000 | 50.1677 |
| 2    | 31.507  | 40805.063 | 8000711.000 | 49.8323 |

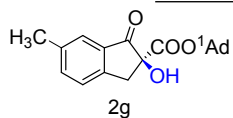



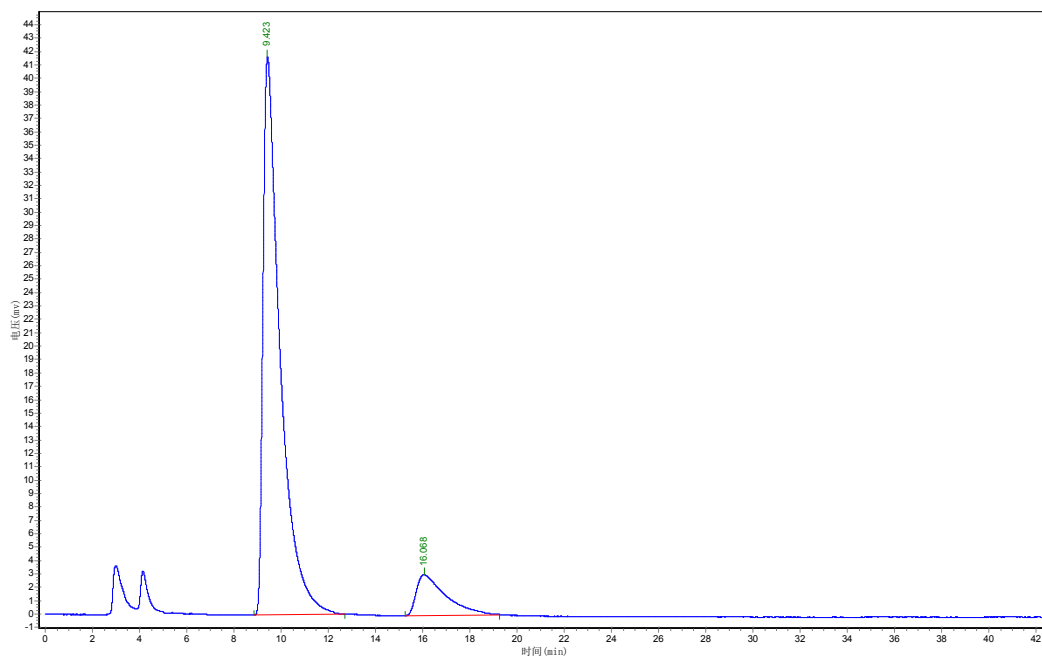

| Peak | RetTime | Height    | Area        | Area%   |
|------|---------|-----------|-------------|---------|
| 1    | 9.423   | 41635.164 | 2099102.250 | 88.9404 |
| 2    | 16.068  | 3040.480  | 261019.656  | 11.0596 |

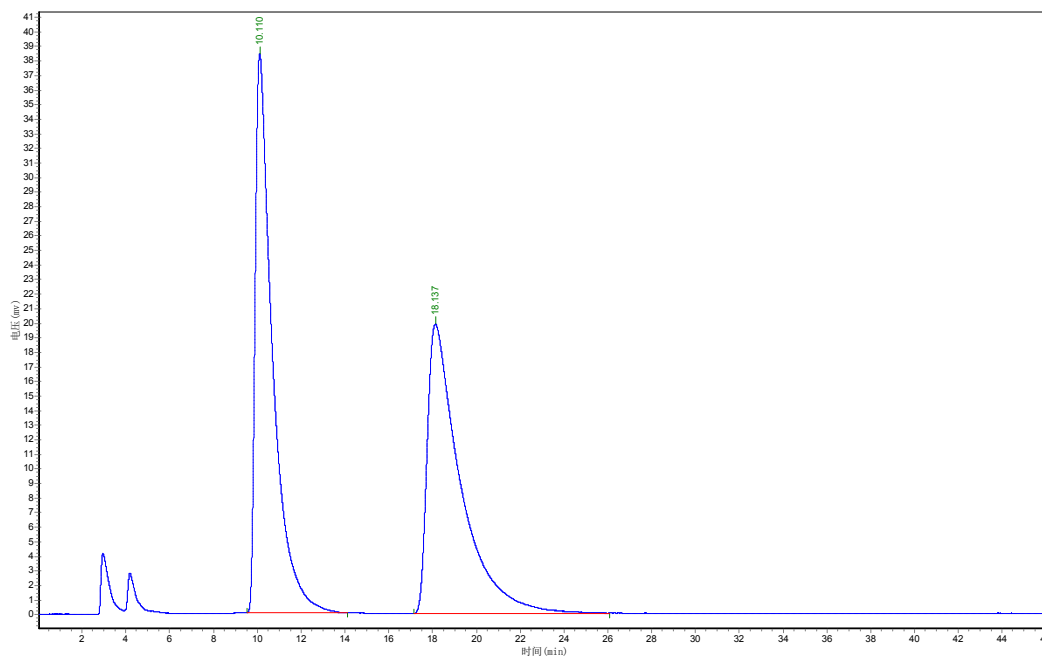

| Peak | RetTime | Height    | Area        | Area%   |
|------|---------|-----------|-------------|---------|
| 1    | 10.110  | 38343.734 | 2107903.250 | 50.3546 |
| 2    | 18.137  | 19875.275 | 2078213.375 | 49.6454 |

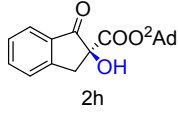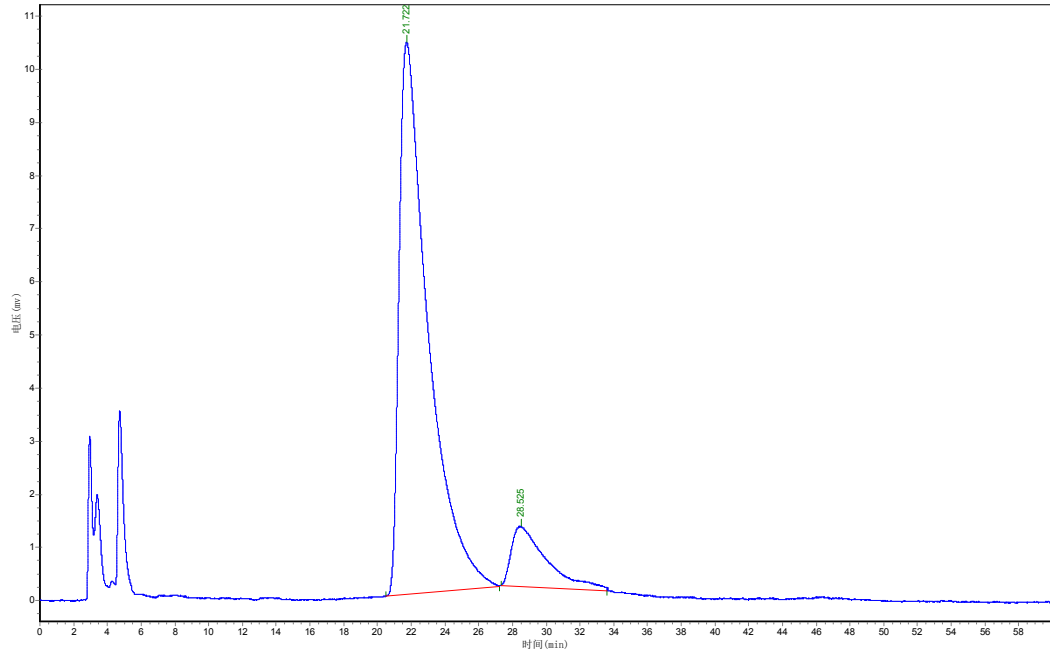

| Peak | RetTime | Height    | Area        | Area%   |
|------|---------|-----------|-------------|---------|
| 1    | 21.722  | 10379.418 | 1236899.500 | 88.3194 |
| 2    | 28.525  | 1129.648  | 163585.813  | 11.6807 |

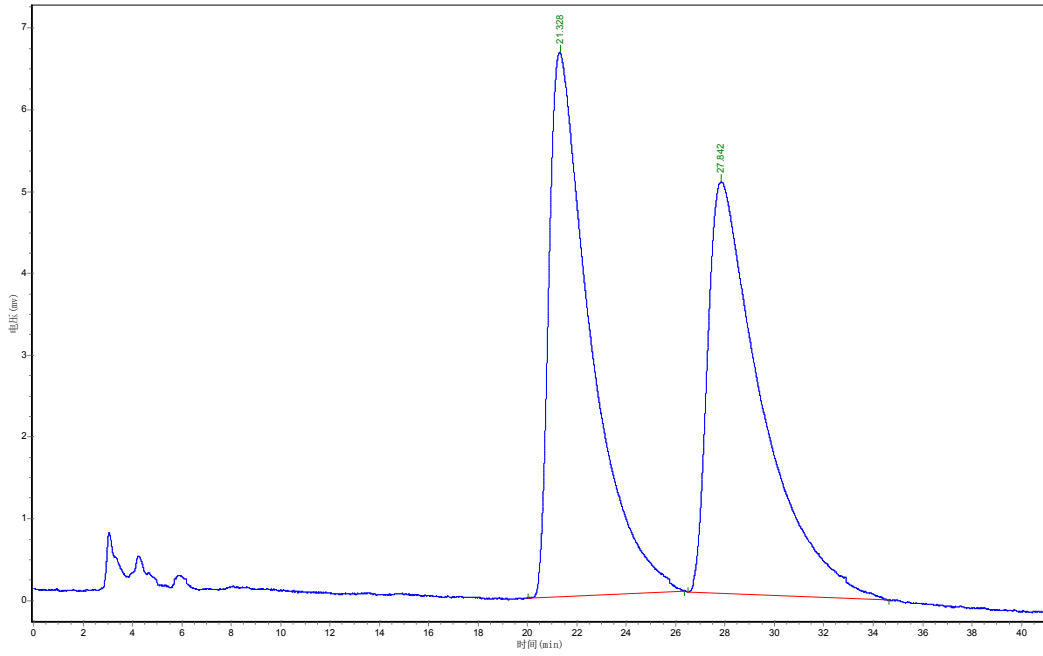

| Peak | RetTime | Height   | Area       | Area%   |
|------|---------|----------|------------|---------|
| 1    | 21.328  | 6658.484 | 777516.250 | 50.5989 |
| 2    | 27.842  | 5034.317 | 759111.375 | 49.4011 |

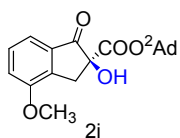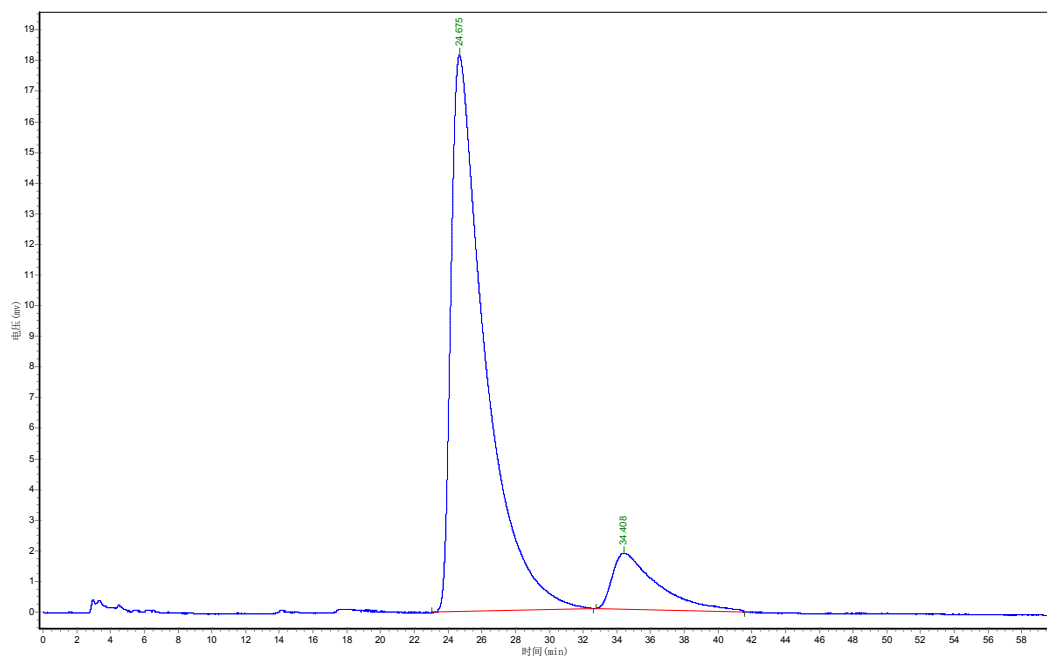

| Peak | RetTime | Height    | Area        | Area%   |
|------|---------|-----------|-------------|---------|
| 1    | 24.675  | 18168.904 | 2529881.250 | 88.2851 |
| 2    | 34.408  | 1819.010  | 335699.281  | 11.7149 |

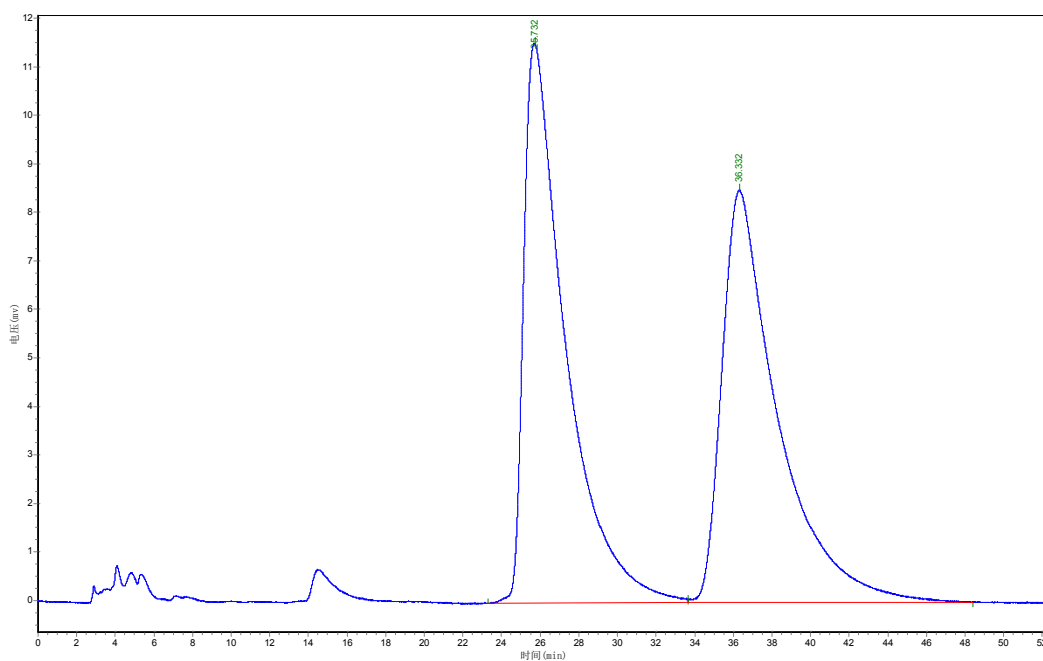

| Peak | RetTime | Height    | Area        | Area%   |
|------|---------|-----------|-------------|---------|
| 1    | 25.732  | 11524.771 | 1736184.875 | 50.5857 |
| 2    | 36.332  | 8491.057  | 1695983.875 | 49.4143 |

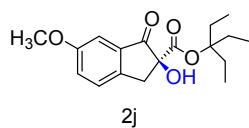

S67

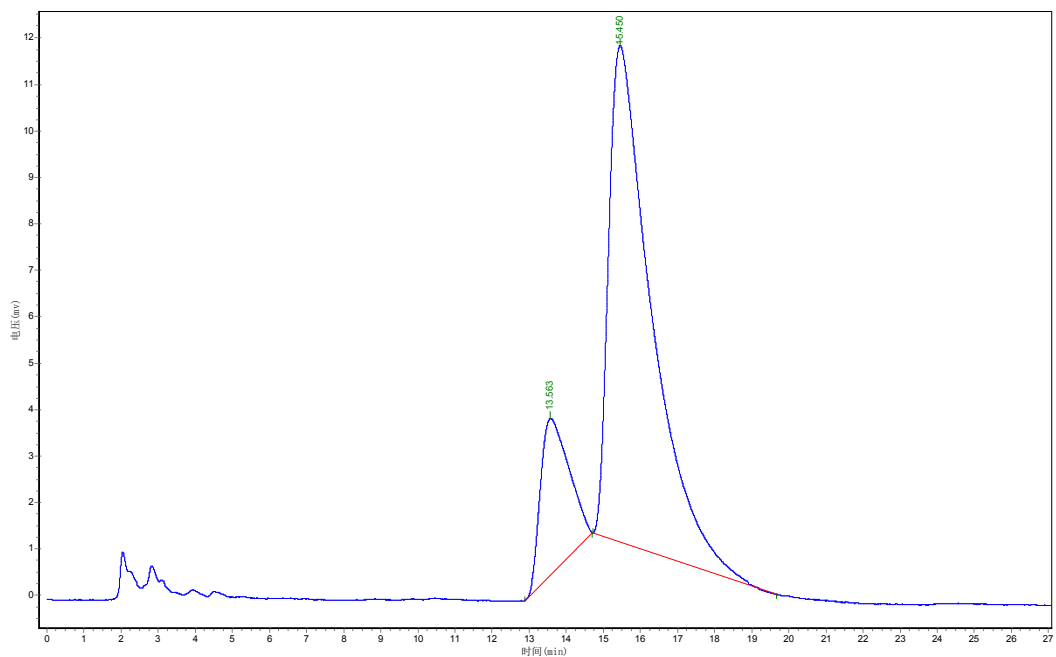

| Peak | RetTime | Height    | Area       | Area%   |
|------|---------|-----------|------------|---------|
| 1    | 13.563  | 3376.964  | 178124.297 | 17.1674 |
| 2    | 15.450  | 10696.258 | 859451.250 | 82.8326 |

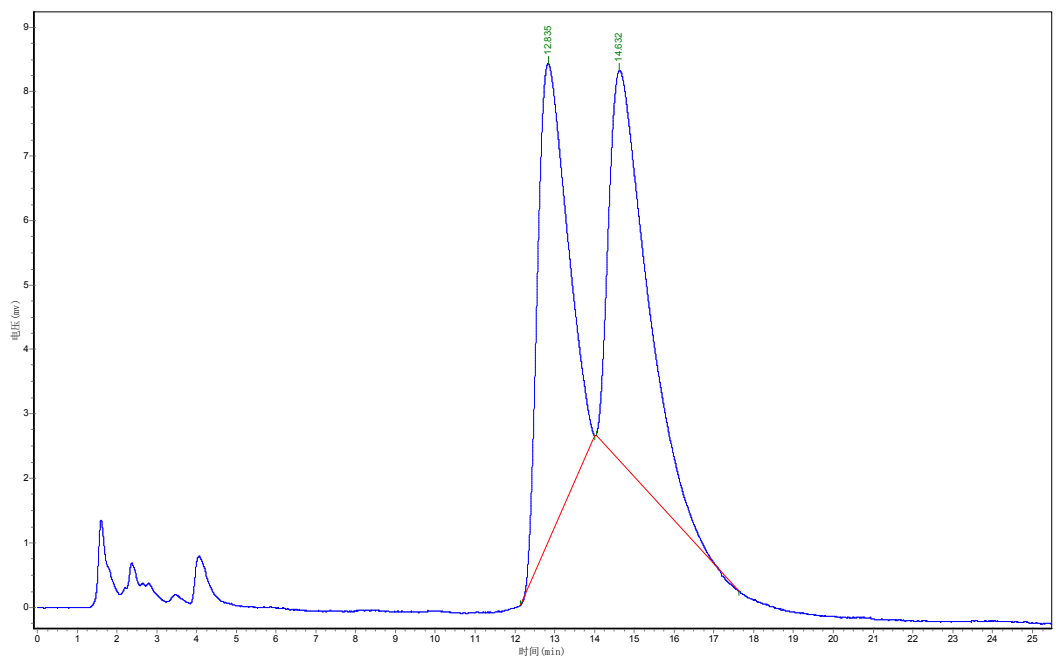

| Peak | RetTime | Height   | Area       | Area%   |
|------|---------|----------|------------|---------|
| 1    | 12.835  | 7438.766 | 382969.031 | 48.4829 |
| 2    | 14.632  | 6060.933 | 406937.031 | 51.5171 |

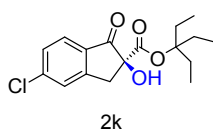

2k

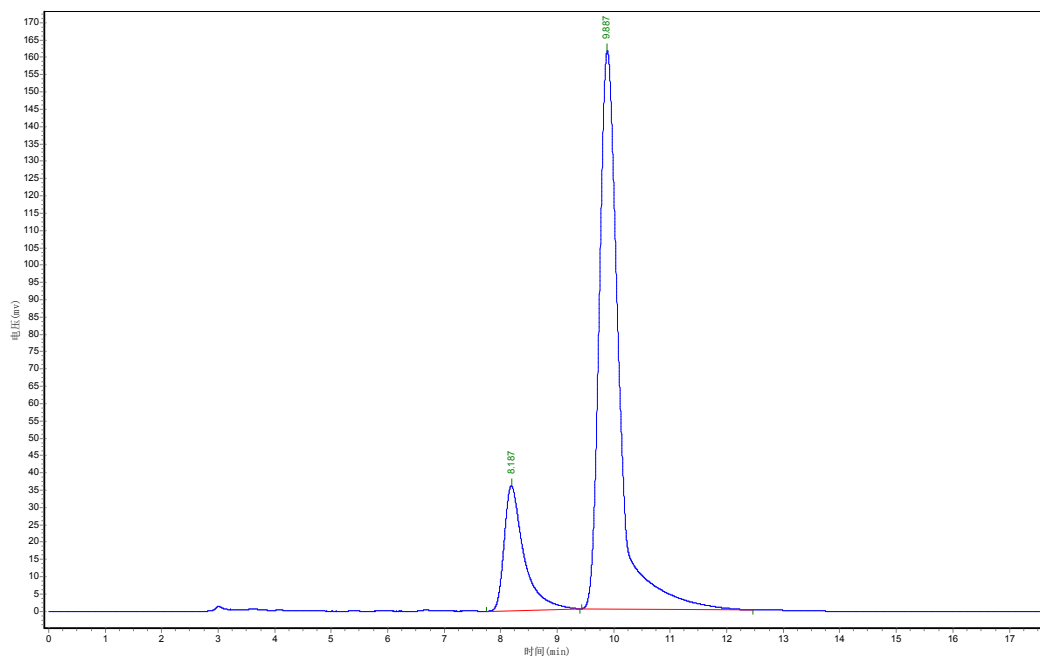

| Peak | RetTime | Height     | Area        | Area%   |
|------|---------|------------|-------------|---------|
| 1    | 8.187   | 36041.023  | 874505.813  | 18.1714 |
| 2    | 9.887   | 161151.328 | 3938022.250 | 81.8286 |

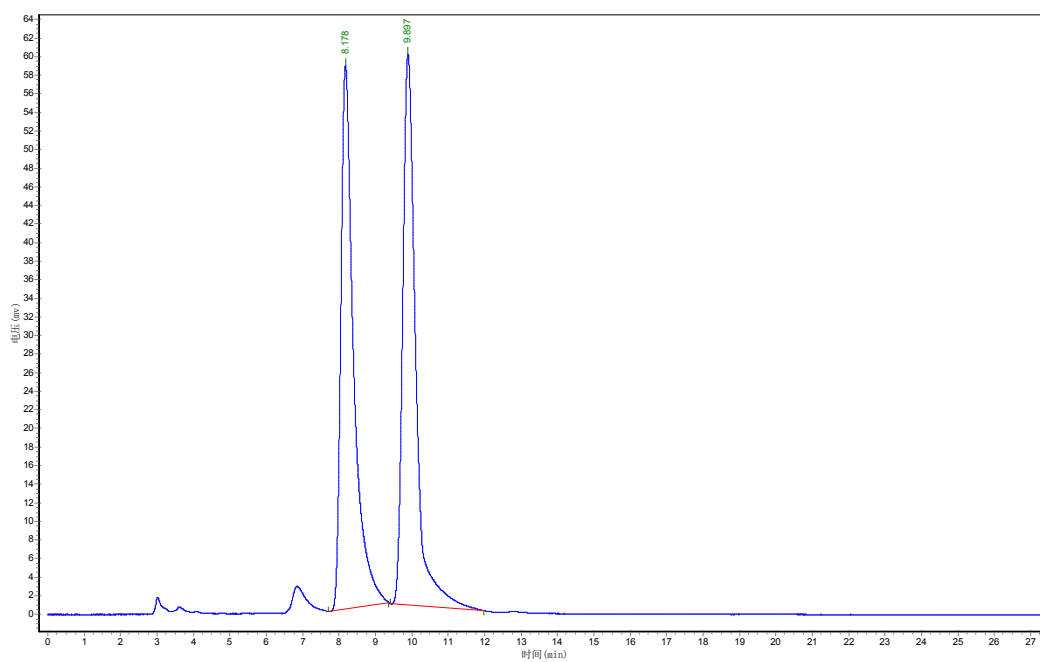

| Peak | RetTime | Height    | Area        | Area%   |
|------|---------|-----------|-------------|---------|
| 1    | 8.178   | 58511.852 | 1430676.375 | 49.3589 |
| 2    | 9.897   | 59265.402 | 1467840.125 | 50.6411 |

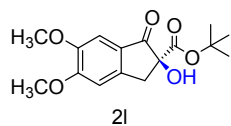

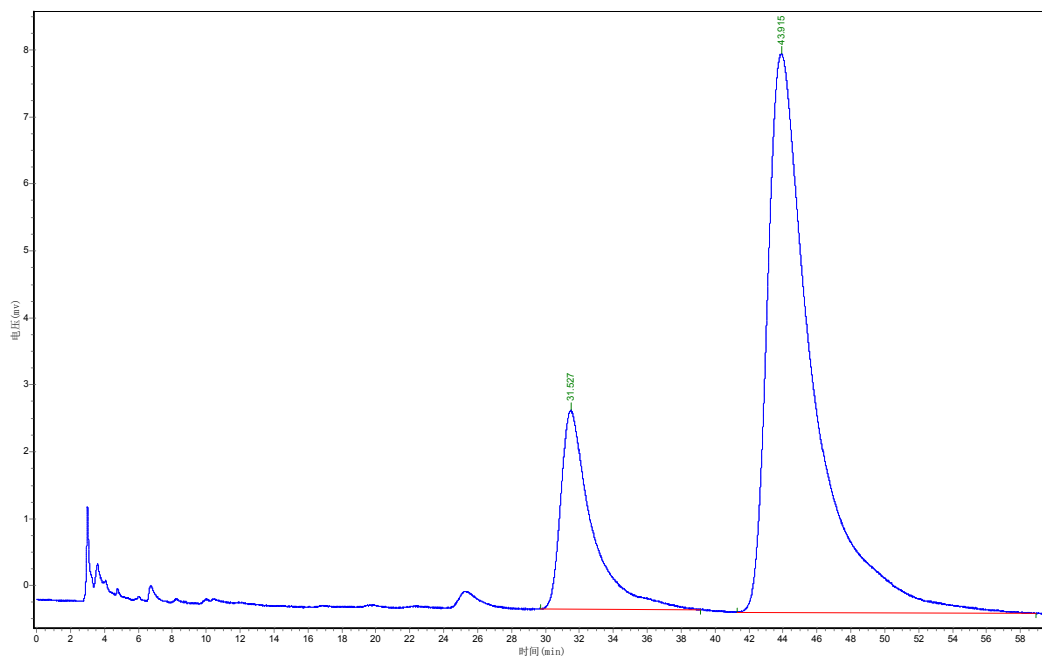

| Peak | RetTime | Height   | Area        | Area%   |
|------|---------|----------|-------------|---------|
| 1    | 31.527  | 2969.728 | 377926.563  | 19.5678 |
| 2    | 43.915  | 8345.824 | 1553439.750 | 80.4322 |

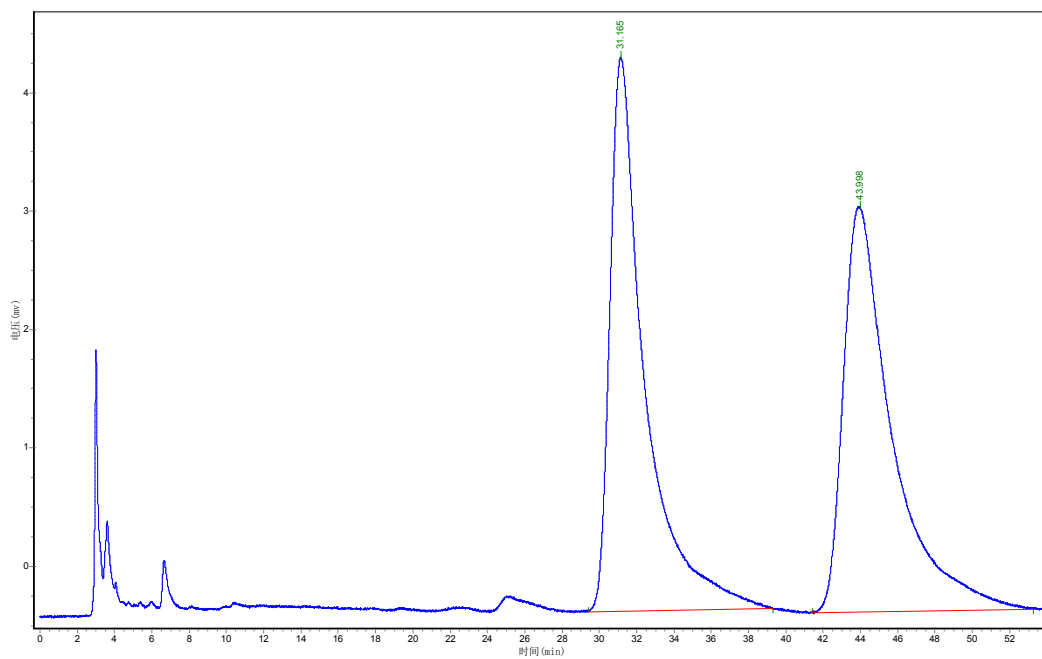

| Peak | RetTime | Height   | Area       | Area%   |
|------|---------|----------|------------|---------|
| 1    | 31.165  | 4670.549 | 608210.875 | 49.6910 |
| 2    | 43.998  | 3418.674 | 615774.500 | 50.3090 |

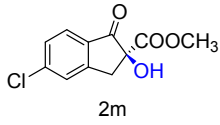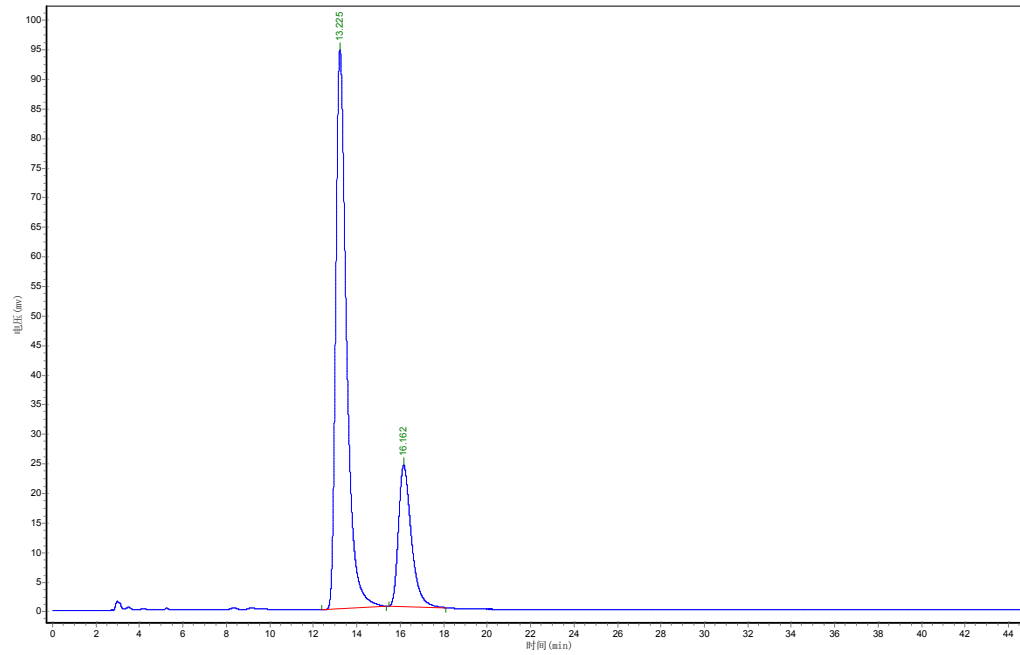

| Peak | RetTime | Height    | Area        | Area%   |
|------|---------|-----------|-------------|---------|
| 1    | 13.225  | 94542.797 | 3266573.000 | 76.9001 |
| 2    | 16.162  | 23935.619 | 981238.125  | 23.0999 |

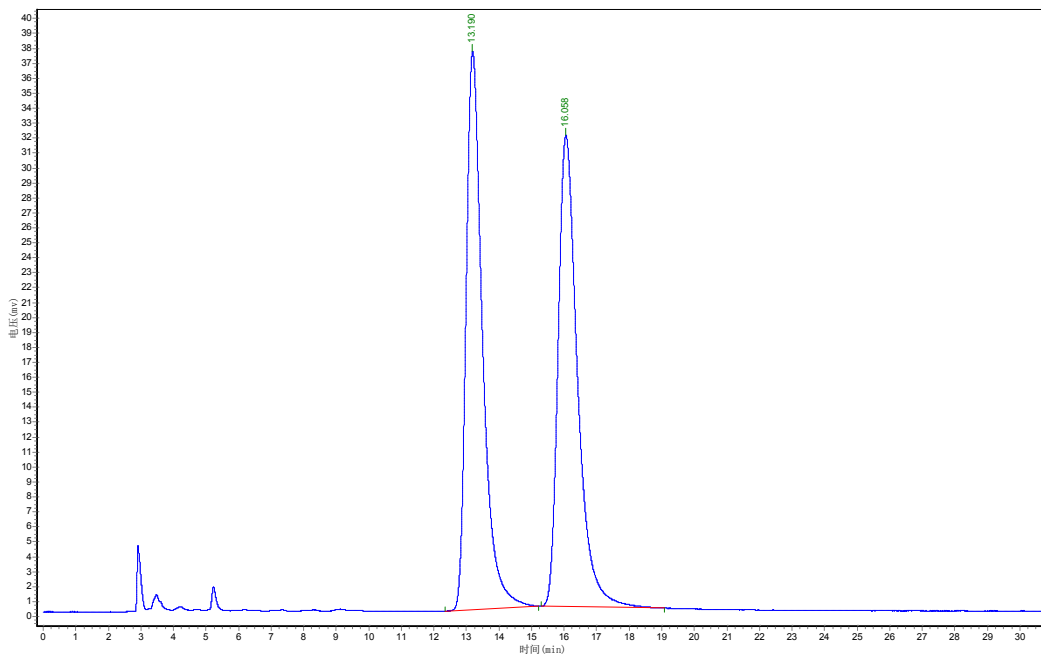

| Peak | RetTime | Height    | Area        | Area%   |
|------|---------|-----------|-------------|---------|
| 1    | 13.190  | 37338.070 | 1311683.625 | 50.1650 |
| 2    | 16.058  | 31516.746 | 1303054.000 | 49.8350 |

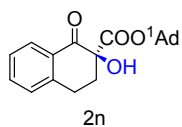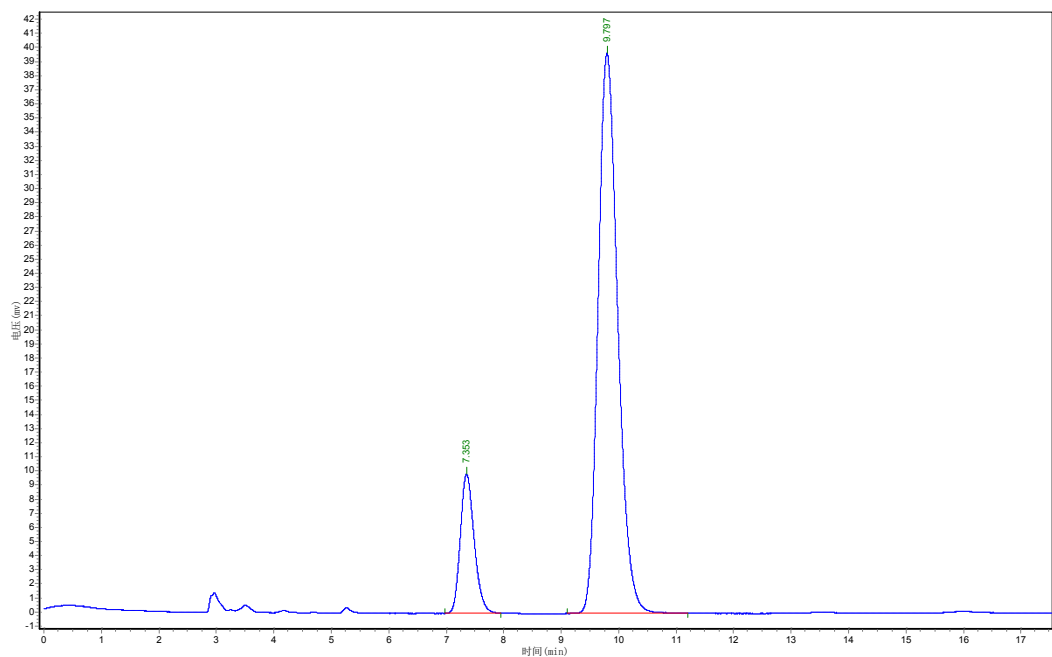

| Peak | RetTime | Height    | Area       | Area%   |
|------|---------|-----------|------------|---------|
| 1    | 7.353   | 9859.950  | 165367.906 | 14.9158 |
| 2    | 9.797   | 39685.785 | 943307.688 | 85.0842 |

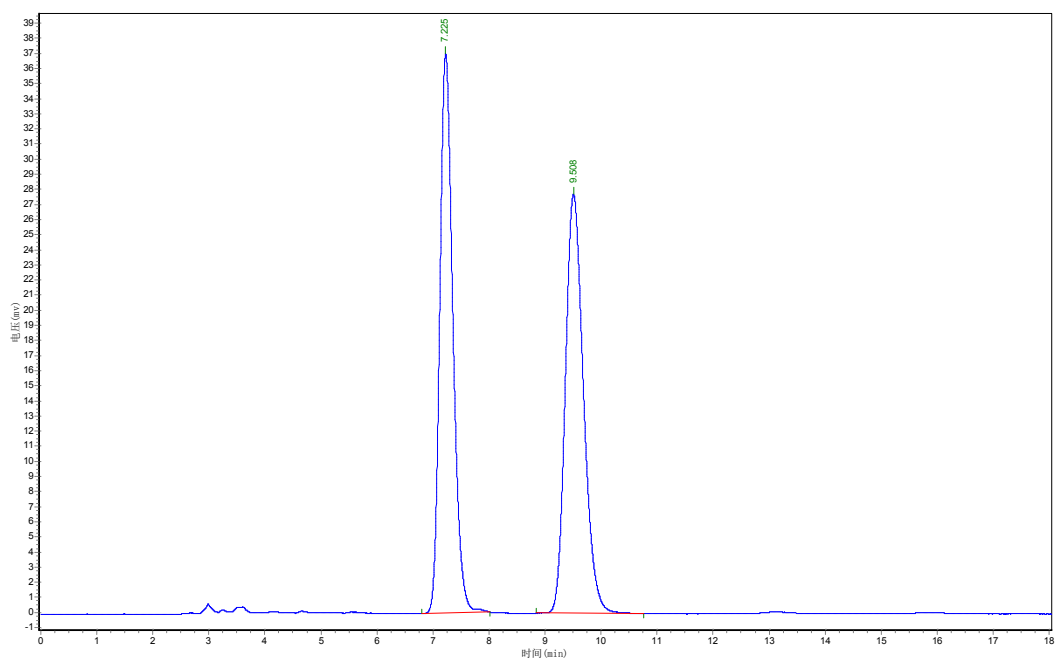

| Peak | RetTime | Height    | Area       | Area%   |
|------|---------|-----------|------------|---------|
| 1    | 7.225   | 37017.117 | 600876.188 | 49.1471 |
| 2    | 9.508   | 27721.977 | 621731.813 | 50.8529 |



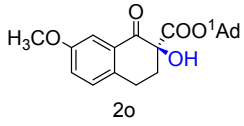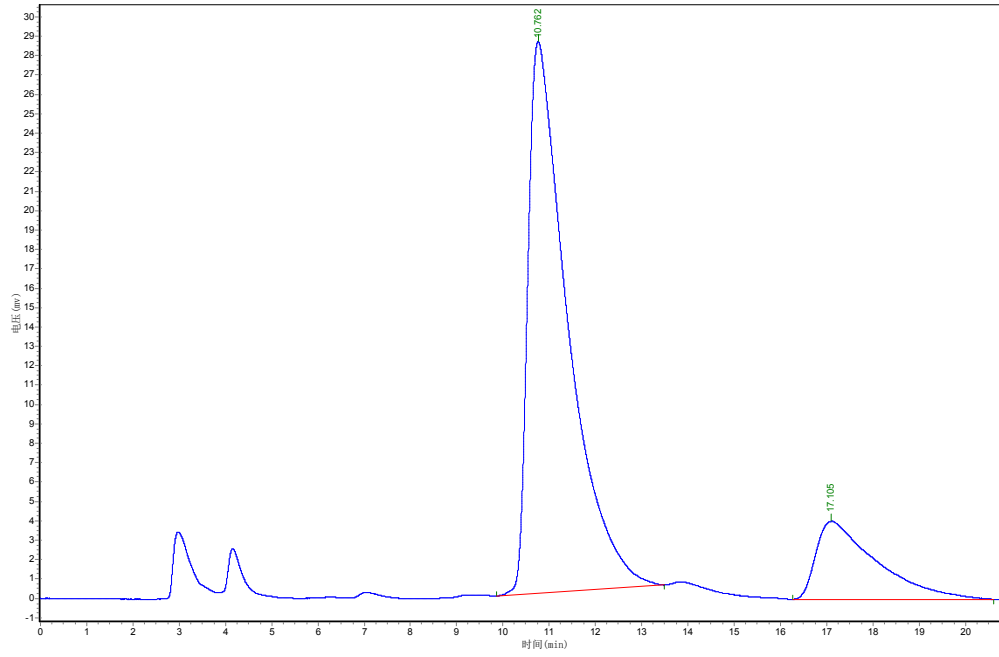

| Peak | RetTime | Height    | Area        | Area%   |
|------|---------|-----------|-------------|---------|
| 1    | 10.762  | 28468.848 | 1705628.000 | 82.4618 |
| 2    | 17.105  | 4021.543  | 362757.781  | 17.5382 |

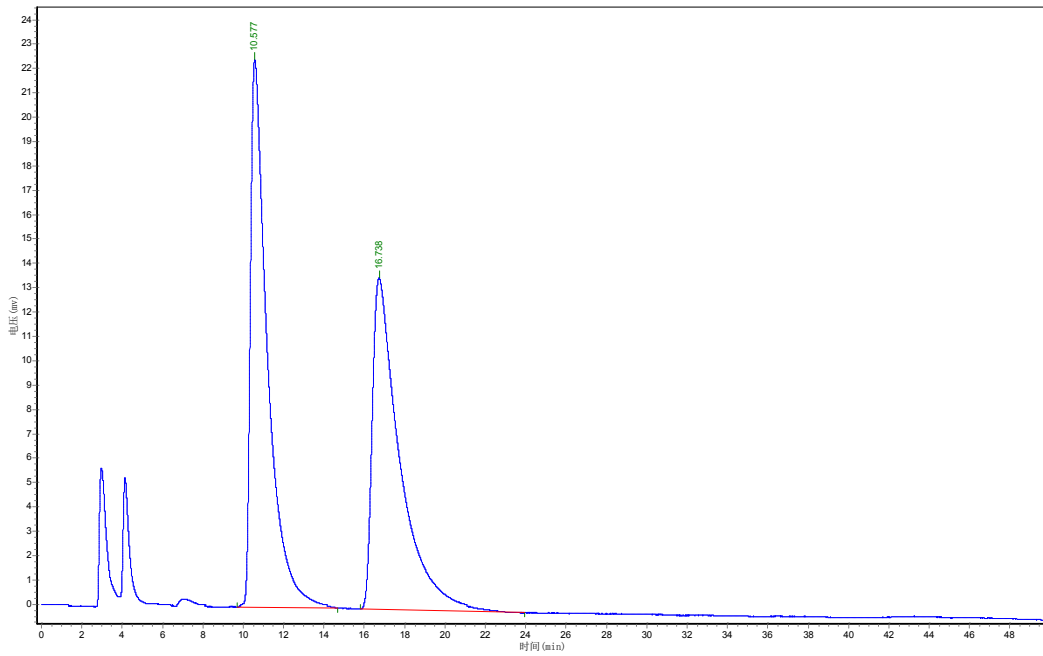

| Peak | RetTime | Height    | Area        | Area%   |
|------|---------|-----------|-------------|---------|
| 1    | 10.577  | 22484.283 | 1322801.750 | 50.6488 |
| 2    | 16.738  | 13609.563 | 1288914.750 | 49.3512 |

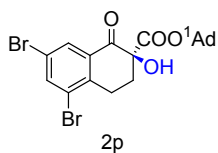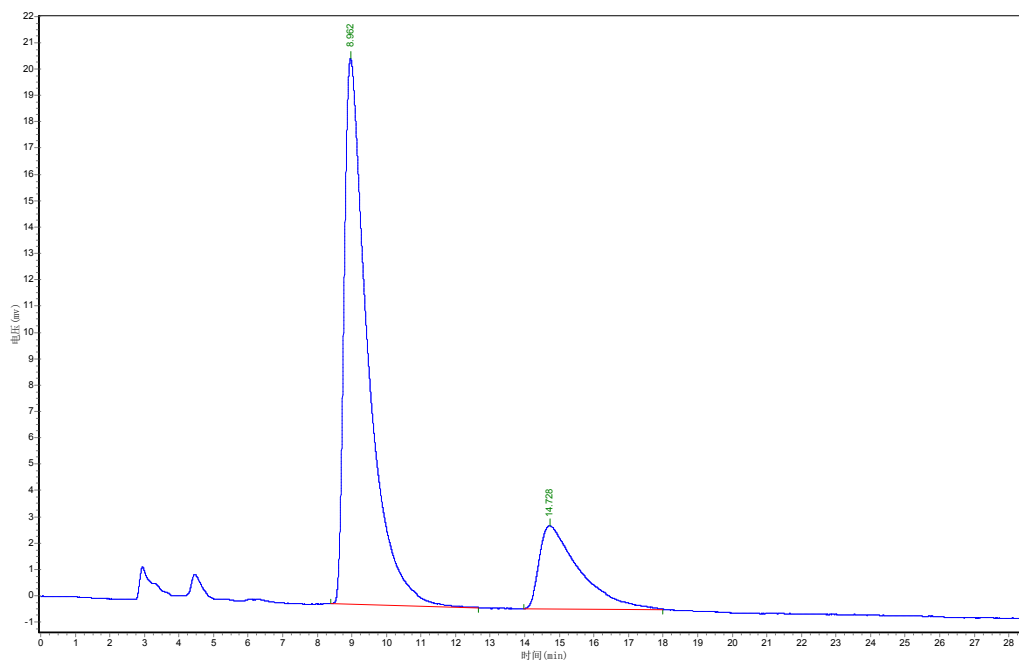

| Peak | RetTime | Height    | Area       | Area%   |
|------|---------|-----------|------------|---------|
| 1    | 8.962   | 20705.207 | 982955.125 | 79.6210 |
| 2    | 14.728  | 3152.496  | 251587.406 | 20.3790 |

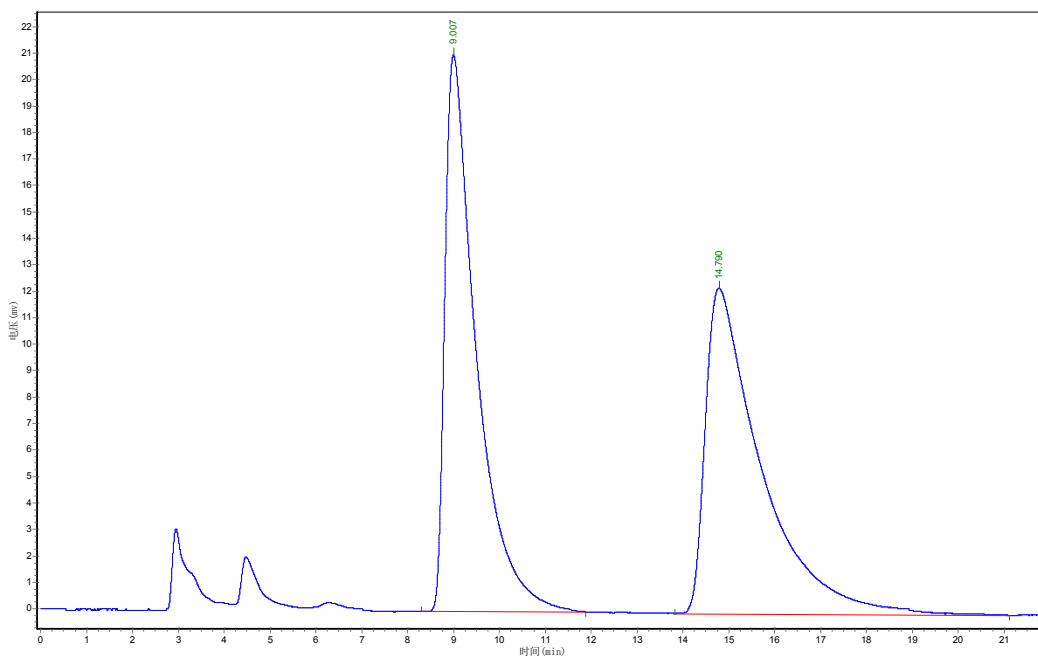

| Peak | RetTime | Height    | Area        | Area%   |
|------|---------|-----------|-------------|---------|
| 1    | 9.007   | 21033.711 | 999876.000  | 49.1205 |
| 2    | 14.790  | 12290.932 | 1035682.188 | 50.8795 |

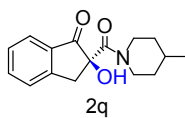

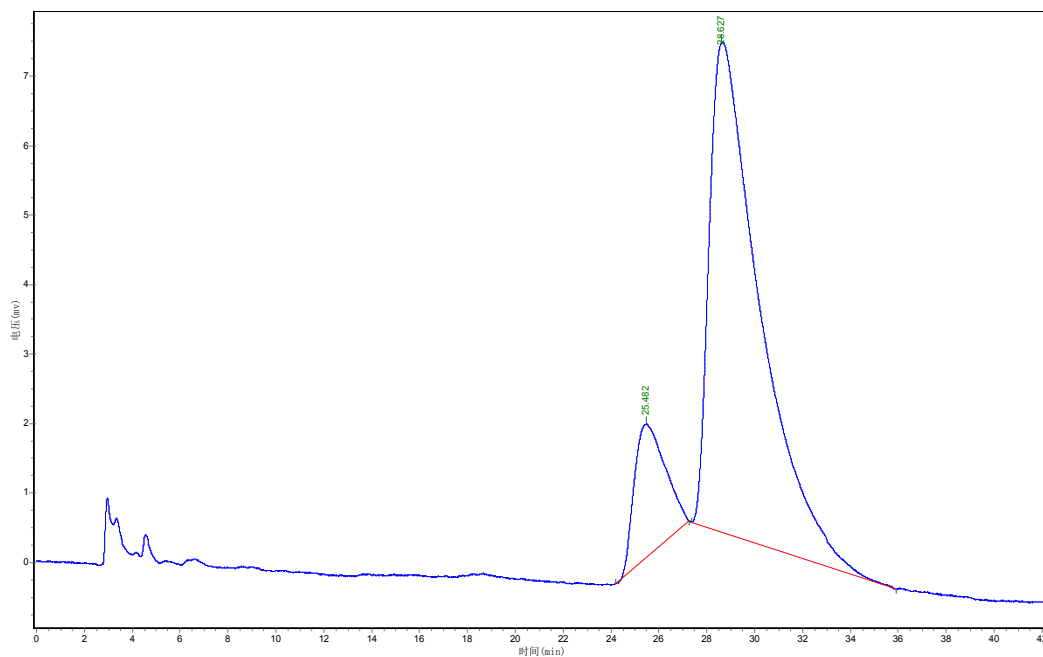

| Peak | RetTime | Height   | Area        | Area%   |
|------|---------|----------|-------------|---------|
| 1    | 25.482  | 1921.454 | 170151.906  | 14.1393 |
| 2    | 28.627  | 7054.237 | 1033243.938 | 85.8607 |

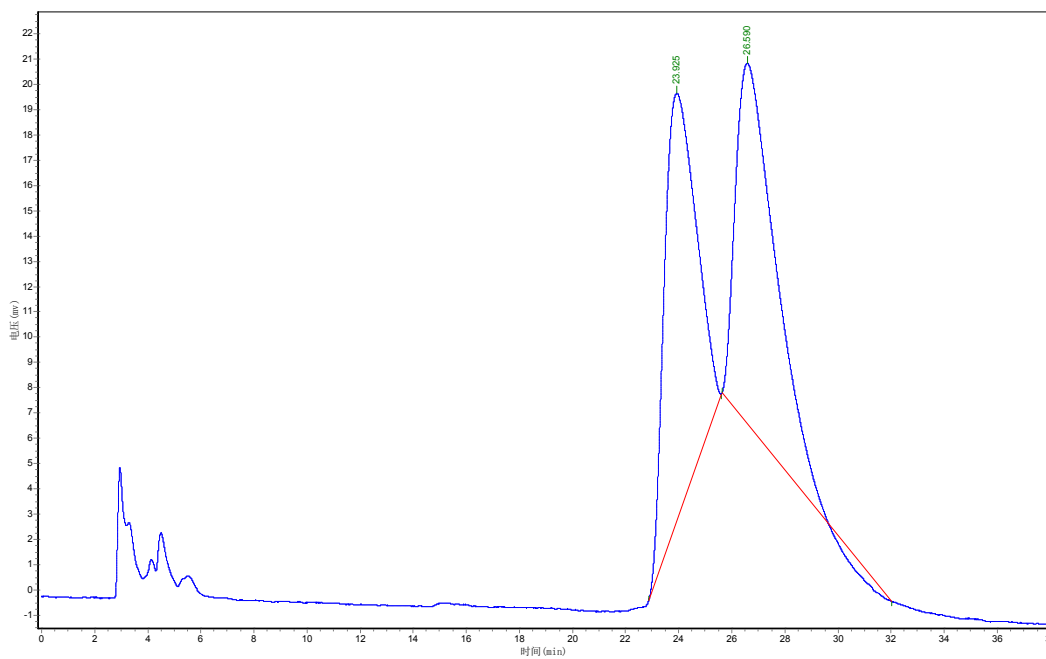

| Peak | RetTime | Height    | Area        | Area%   |
|------|---------|-----------|-------------|---------|
| 1    | 23.925  | 16911.932 | 1397439.125 | 48.8369 |
| 2    | 26.590  | 14261.473 | 1464004.375 | 51.1631 |

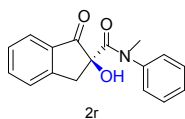

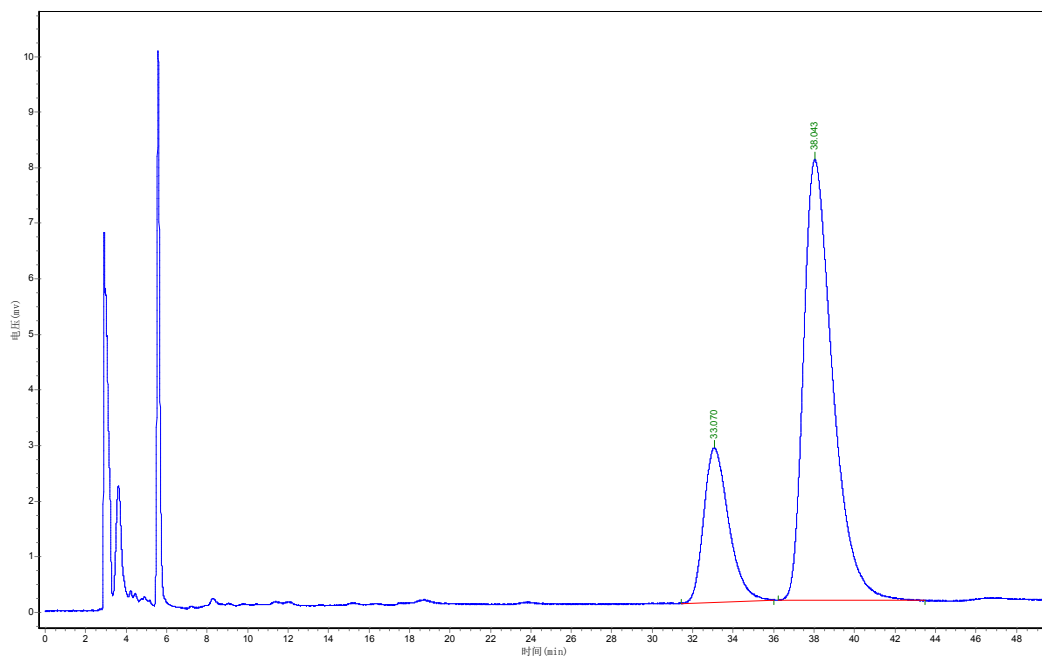

| Peak | RetTime | Height   | Area       | Area%   |
|------|---------|----------|------------|---------|
| 1    | 33.070  | 2781.233 | 238009.188 | 23.1548 |
| 2    | 38.043  | 7931.999 | 789893.625 | 76.8452 |

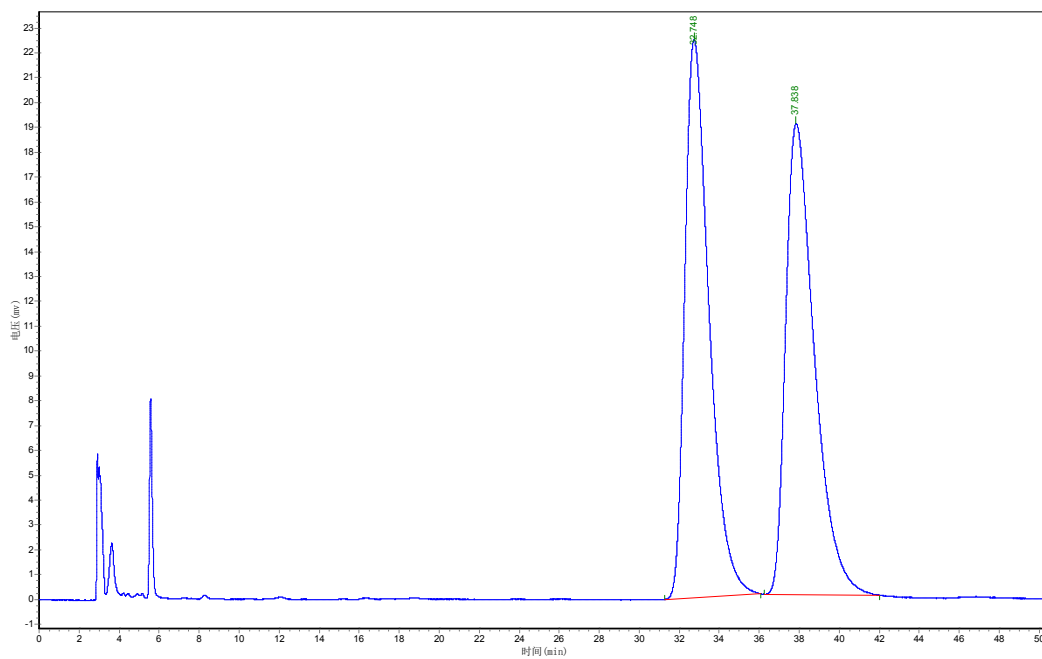

| Peak | RetTime | Height    | Area        | Area%   |
|------|---------|-----------|-------------|---------|
| 1    | 32.748  | 22453.492 | 1888366.375 | 50.0054 |
| 2    | 37.838  | 18960.984 | 1887959.000 | 49.9946 |

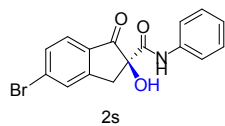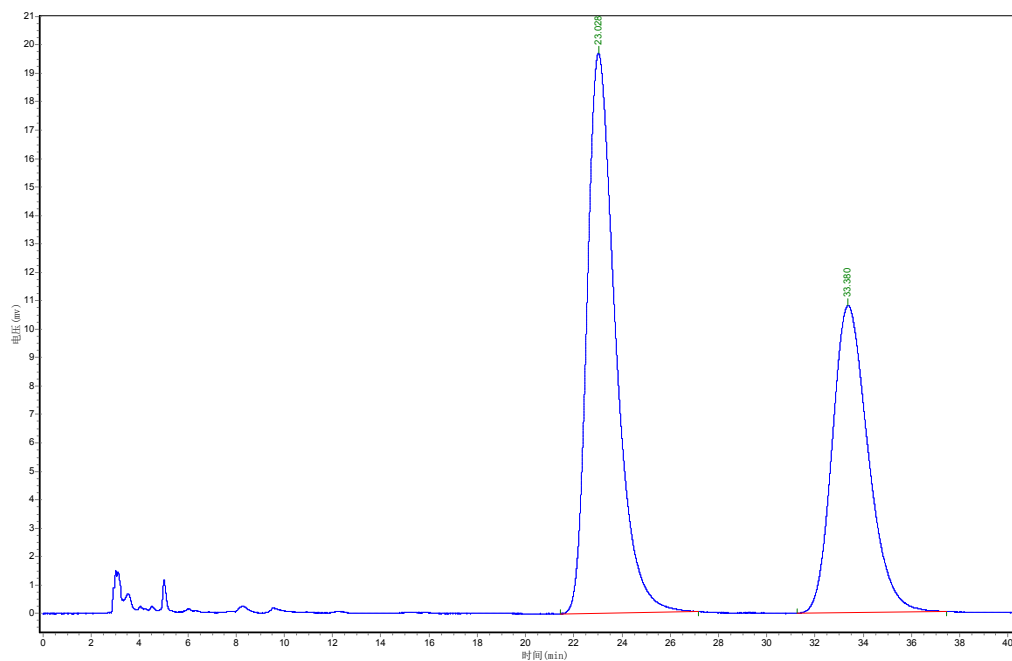

| Peak | RetTime | Height    | Area        | Area%   |
|------|---------|-----------|-------------|---------|
| 1    | 23.028  | 19692.123 | 1603593.500 | 59.0838 |
| 2    | 33.380  | 10797.882 | 1110506.250 | 40.9162 |

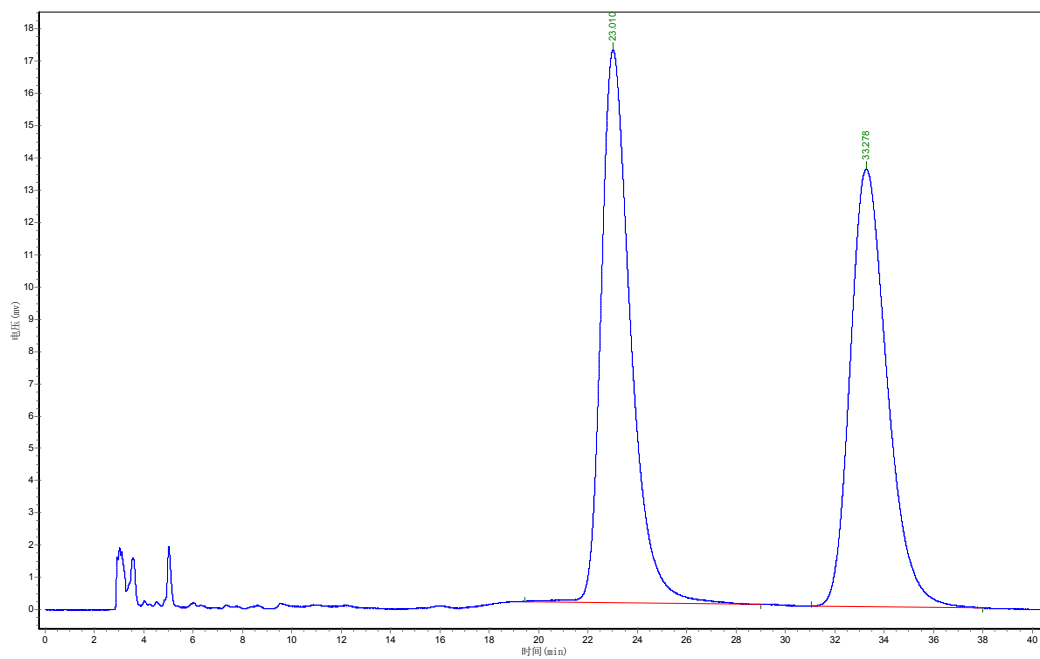

| Peak | RetTime | Height    | Area        | Area%   |
|------|---------|-----------|-------------|---------|
| 1    | 23.010  | 17124.611 | 1416533.875 | 50.1111 |
| 2    | 33.278  | 13572.252 | 1410253.625 | 49.8889 |

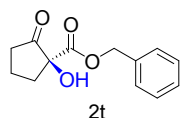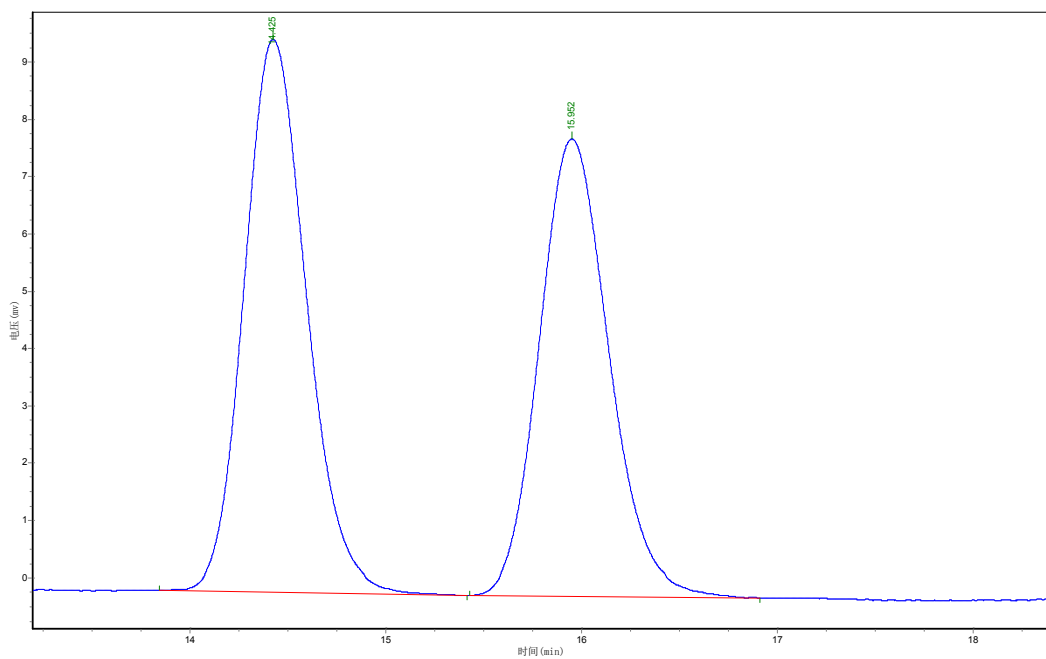

| Peak | RetTime | Height   | Area       | Area%   |
|------|---------|----------|------------|---------|
| 1    | 14.425  | 9653.582 | 214550.156 | 52.0070 |
| 2    | 15.952  | 7987.054 | 197990.500 | 47.9930 |

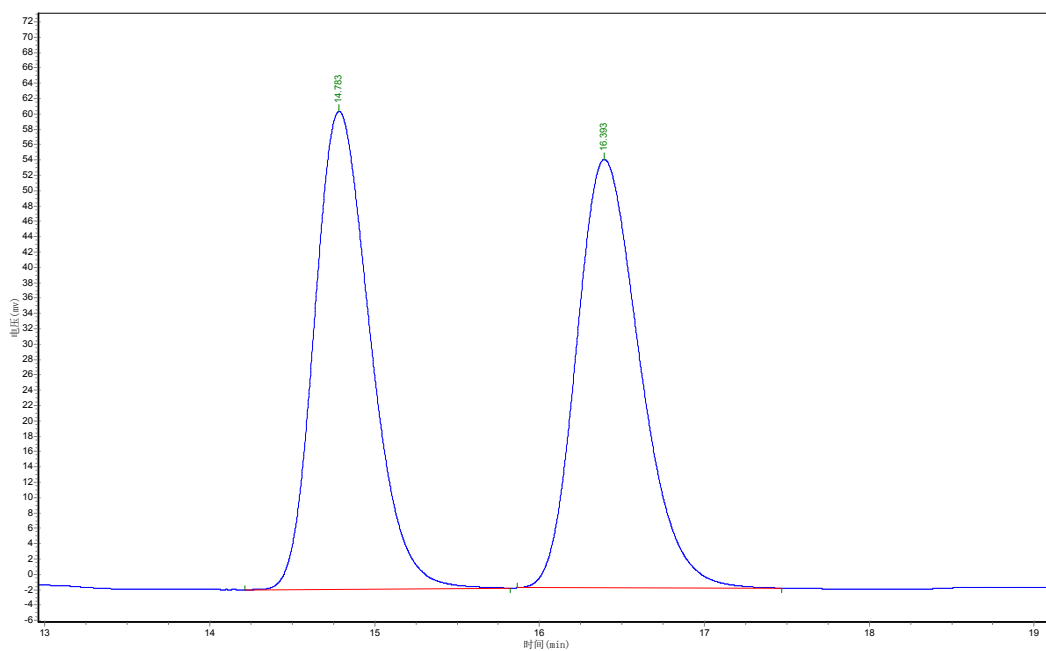

| Peak | RetTime | Height    | Area        | Area%   |
|------|---------|-----------|-------------|---------|
| 1    | 14.783  | 62261.758 | 1459611.875 | 49.5063 |
| 2    | 16.393  | 55818.898 | 1488721.125 | 50.4937 |

## 8. References

1. J. H. Lee, M. S. Yoo, J. H. Jung, S. S. Jew, H. G. Park, B. S. Jeong, *Tetrahedron*, **2007**, *63*, 7906-7915.
2. (a) Y. Wu, R. P. Singh, L. Deng, *J. Am. Chem. Soc.* **2011**, *133*, 12458-12461; (b) Y. Wu, L. Deng, *J. Am. Chem. Soc.* **2012**, *134*, 14334-14337.
3. H. Huo, X. Shen, C. Wang, L. Zhang, P. Röse, L. Chen, K. Harms, M. Marsh, G. Hilt, E. Meggers, *Nature* **2014**, *515*, 100-103.
4. H. Liu, W. Feng, C. W. Kee, Y. Zhao, D. Leow, Y. Pan, C. H. Tan, *Green Chem.* **2010**, *12*, 953-956.
